# Supplementary material for: Completing the SME Carbon Profile: Scalable Prediction of Scope 3 Emissions
Source: Research Square preprint supplement (doi:10.21203/rs.3.rs-8241893/v1), 2025-12-04
Supplement: Supplementary file 1 [file 0381c6e71ec8309d6ba6d416.docx]

# Supporting Information S3 – Transaction Category Mapping and Conversion Factor Calculations

This supporting information provides details on each transaction categories mapping to Greenhouse Gas Protocol Scope 3 categories, their conversion factor, and description. The figure below illustrates how these spend codes map to Scope 3 categories. We then discuss how each Scope 3 category is estimated, before providing a detailed table of expenditure code, heading hierarchy, and conversion factor. Transaction codes organised in a multi-level taxonomy. Each transaction code maps to a unique category path with up to three levels: Heading (Level 1), Sub-heading 1 (Level 2), and Sub-heading 2 (Level 3). Where possible, transactions are classified into the most specific sub-heading; otherwise, they are assigned at a higher level. The final table contains descriptive statistics of estimated emissions categories by industry.

Figure S4. Sankey plot shows TCS to GHG Protocol Mapping. Diagram created using SankeyMATIC.


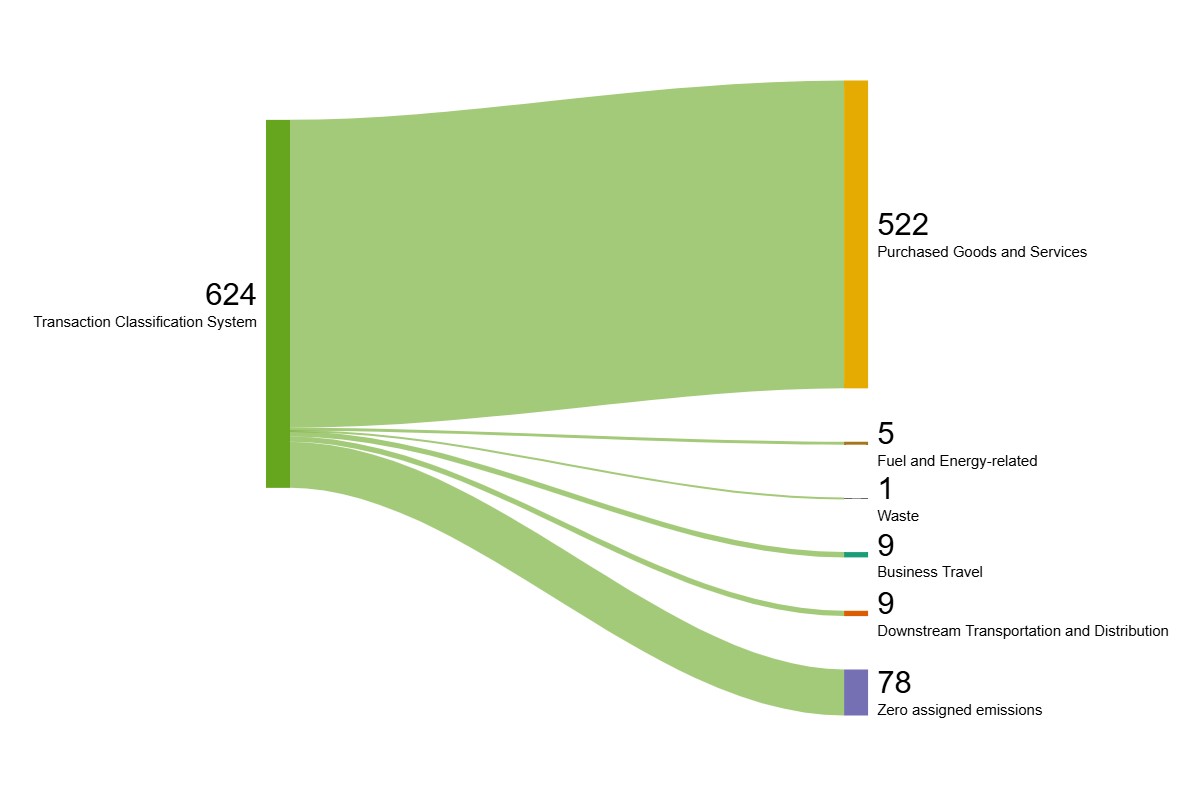


**Estimating Category 1. Purchased Goods & Services**

UKMRIO conversion factors are mapped to 522 transaction classifications, relevant to this Scope 3 category. As noted in Table 1, we assume that transportation costs are embedded within payments for these purchases, thereby implicitly capturing Category 4 (Upstream Transport and Distribution), with these emissions also reflected in each EEMRIO conversion factor.

**Estimating Category 3. Fuel- and Energy-related purchases**

To calculate upstream emissions from fuel and energy consumption, we isolate two relevant categories of spend: “Energy & Utilities” and “Vehicle Fuelling”. The former refers to 4 sub-categories of expenditure, containing energy providers selling electricity, natural gas, and heating oil, whilst the latter refers to diesel and petrol purchased for mobile combustion.

As shown in Phillpotts et al. (2025), two adjustments to "Energy & Utilities" spending are necessary. In instances where UK utility firms are known to provide electricity, gas, and heating oil to consumers, firms are classified under the heading code "Energy & Utilities" (Code 139). Here, spending is disaggregated into fuels (Code 140) and electricity (Code 141). Second, consumption-weighted adjustment factors are required to reflect lower unit costs for higher-usage bands.

To create a set of conversion factors capturing the upstream emissions associated with purchases of different energy and fuel types. We divide well-to-tank emissions per unit figures (CO2e / kwh (or litre); BEIS and DEFRA, 2022) by average price paid by non-domestic consumers per unit (£ / kwh (or litre); DESNZ, 2024) to return emissions produced per pound spent (CO2e / £). These reflect the emissions produced during the extraction, processing, and distribution of fuels and energy. As spending within “Vehicle Fuelling” reflects the consumption of both petrol and diesel, we produce a single conversion factor through a weighted average based on the UK’s consumption split between petrol and diesel (DESNZ and BIES, 2022) and the unit price difference. For gas and oil, we use an average conversion factor given the near zero difference in individual factors. Finally, for electricity, our emission conversion factor is based on the UK grid’s emission intensity (location-based method). We provide this calculation in table 8.

Table S3. Calculation of WTT emission conversion factors

|  | **Scope 1 related** | | | | **Scope 2 related** |
| --- | --- | --- | --- | --- | --- |
|  | **Petrol** | **Diesel** | **Gas** | **Oil** | **Electricity** |
| Emissions per Unit | 0.61 | 0.61 | 0.03 | 0.53 | 0.02 |
| Average Unit Price (£) | 1.31 | 1.35 | 0.03 | 0.43 | 0.15 |
| Emissions per Pound | 0.47 | 0.45 | 1.02 | 1.23 | 0.12 |
| Consumption Split | 68% | 32% |  |  |  |
| **Conversion Factors** | **0.457** | | **1.130** | | **0.125** |

**Estimating Category 6. Business travel**

To calculate emissions from Business Travel, we use 9 spend sub-categories under ‘Travel’, including general travel, air, rail, bus, car rental, and hotels. We are required to assume travel costs are captured directly in the business account, excluding employee-paid expenses later reimbursed. Emissions are calculated using UKMRIO-mapped conversion factors for rail, land, water, and air transport, and accommodation services.

**Estimating Category 9. Downstream transportation and distribution**

Given upstream transport emissions are assumed to be embedded in purchase costs; all spend with logistics and courier merchants is assumed to reflect downstream distribution. Emissions are calculated using 9 spend sub-categories under “Transportation and Logistics”, including freight, delivery, maritime, and rail, mapped to UKMRIO conversion factors for relevant transport and courier sectors.

Table S4. Expenditure codes, headings, emissions factors and associated Scope 3 category

| **Scope 3 Category** | **Transaction Code** | **Heading** | **Sub-heading 1** | **Sub-heading 2** | **Emission Factor** |
| --- | --- | --- | --- | --- | --- |
| 1 | code_1 | Adult |  |  | 0.139712 |
| 1 | code_2 | Arts & Entertainment |  |  | 0.263201 |
| 1 | code_3 | Arts & Entertainment | Celebrities & Entertainment News |  | 0.176778 |
| 1 | code_4 | Arts & Entertainment | Comics & Animation |  | 0.173578 |
| 1 | code_5 | Arts & Entertainment | Comics & Animation | Anime & Manga | 0.173578 |
| 1 | code_6 | Arts & Entertainment | Comics & Animation | Cartoons | 0.173578 |
| 1 | code_7 | Arts & Entertainment | Comics & Animation | Comics | 0.195566 |
| 1 | code_8 | Arts & Entertainment | Entertainment Industry |  | 0.155141 |
| 1 | code_9 | Arts & Entertainment | Entertainment Industry | Film & TV Industry | 0.155141 |
| 1 | code_10 | Arts & Entertainment | Entertainment Industry | Recording Industry | 0.155141 |
| 1 | code_11 | Arts & Entertainment | Events & Listings |  | 0.285517 |
| 1 | code_12 | Arts & Entertainment | Events & Listings | Bars Clubs & Nightlife | 0.302584 |
| 1 | code_13 | Arts & Entertainment | Events & Listings | Concerts & Music Festivals | 0.302584 |
| 1 | code_14 | Arts & Entertainment | Events & Listings | Expos & Conventions | 0.302584 |
| 1 | code_15 | Arts & Entertainment | Events & Listings | Film Festivals | 0.18328 |
| 1 | code_16 | Arts & Entertainment | Events & Listings | Movie Listings & Theater Showtimes | 0.18328 |
| 1 | code_17 | Arts & Entertainment | Fun & Trivia |  | 0.221568 |
| 1 | code_18 | Arts & Entertainment | Fun & Trivia | Flash-Based Entertainment | 0.221568 |
| 1 | code_19 | Arts & Entertainment | Fun & Trivia | Fun Tests & Silly Surveys | 0.221568 |
| 1 | code_20 | Arts & Entertainment | Humor |  | 0.153234 |
| 1 | code_21 | Arts & Entertainment | Humor | Funny Pictures & Videos | 0.153234 |
| 1 | code_22 | Arts & Entertainment | Humor | Political Humor | 0.153234 |
| 1 | code_23 | Arts & Entertainment | Movies |  | 0.152584 |
| 1 | code_24 | Arts & Entertainment | Music & Audio |  | 0.135089 |
| 1 | code_25 | Arts & Entertainment | Music & Audio | CD & Audio Shopping | 0.135089 |
| 1 | code_26 | Arts & Entertainment | Music & Audio | Classical Music | 0.135089 |
| 1 | code_27 | Arts & Entertainment | Music & Audio | Country Music | 0.135089 |
| 1 | code_28 | Arts & Entertainment | Music & Audio | Dance & Electronic Music | 0.135089 |
| 1 | code_29 | Arts & Entertainment | Music & Audio | Experimental & Industrial Music | 0.135089 |
| 1 | code_30 | Arts & Entertainment | Music & Audio | Jazz & Blues | 0.135089 |
| 1 | code_31 | Arts & Entertainment | Music & Audio | Music Education & Instruction | 0.135089 |
| 1 | code_32 | Arts & Entertainment | Music & Audio | Music Equipment & Technology | 0.135089 |
| 1 | code_33 | Arts & Entertainment | Music & Audio | Music Reference | 0.135089 |
| 1 | code_34 | Arts & Entertainment | Music & Audio | Music Streams & Downloads | 0.135089 |
| 1 | code_35 | Arts & Entertainment | Music & Audio | Music Videos | 0.135089 |
| 1 | code_36 | Arts & Entertainment | Music & Audio | Pop Music | 0.135089 |
| 1 | code_37 | Arts & Entertainment | Music & Audio | Radio | 0.135089 |
| 1 | code_38 | Arts & Entertainment | Music & Audio | Religious Music | 0.135089 |
| 1 | code_39 | Arts & Entertainment | Music & Audio | Rock Music | 0.135089 |
| 1 | code_40 | Arts & Entertainment | Music & Audio | Soundtracks | 0.135089 |
| 1 | code_41 | Arts & Entertainment | Music & Audio | Urban & Hip-Hop | 0.135089 |
| 1 | code_42 | Arts & Entertainment | Music & Audio | World Music | 0.135089 |
| 1 | code_43 | Arts & Entertainment | Offbeat |  | 0.201884 |
| 1 | code_44 | Arts & Entertainment | Offbeat | Occult & Paranormal | 0.201884 |
| 1 | code_45 | Arts & Entertainment | Online Media |  | 0.201884 |
| 1 | code_46 | Arts & Entertainment | Online Media | Online Image Galleries | 0.201884 |
| 1 | code_47 | Arts & Entertainment | Performing Arts |  | 0.212149 |
| 1 | code_48 | Arts & Entertainment | Performing Arts | Acting & Theater | 0.212149 |
| 1 | code_49 | Arts & Entertainment | Performing Arts | Circus | 0.212149 |
| 1 | code_50 | Arts & Entertainment | Performing Arts | Dance | 0.212149 |
| 1 | code_51 | Arts & Entertainment | Performing Arts | Magic | 0.212149 |
| 1 | code_52 | Arts & Entertainment | Performing Arts | Opera | 0.212149 |
| 1 | code_53 | Arts & Entertainment | TV & Video |  | 0.152584 |
| 1 | code_54 | Arts & Entertainment | TV & Video | Online Video | 0.152584 |
| 1 | code_55 | Arts & Entertainment | TV & Video | TV Commercials | 0.152584 |
| 1 | code_56 | Arts & Entertainment | TV & Video | TV Shows & Programs | 0.152584 |
| 1 | code_57 | Arts & Entertainment | Visual Art & Design |  | 0.162184 |
| 1 | code_58 | Arts & Entertainment | Visual Art & Design | Architecture | 0.156058 |
| 1 | code_59 | Arts & Entertainment | Visual Art & Design | Art Museums & Galleries | 0.163805 |
| 1 | code_60 | Arts & Entertainment | Visual Art & Design | Design | 0.201884 |
| 1 | code_61 | Arts & Entertainment | Visual Art & Design | Painting | 0.201884 |
| 1 | code_62 | Arts & Entertainment | Visual Art & Design | Photographic & Digital Arts | 0.201884 |
| 1 | code_63 | Autos & Vehicles |  |  | 0.225799 |
| 1 | code_64 | Autos & Vehicles | Bicycles & Accessories |  | 0.33606 |
| 1 | code_65 | Autos & Vehicles | Bicycles & Accessories | Bike Parts & Repair | 0.33606 |
| 1 | code_66 | Autos & Vehicles | Bicycles & Accessories | BMX Bikes | 0.33606 |
| 1 | code_67 | Autos & Vehicles | Boats & Watercraft |  | 0.302606 |
| 1 | code_68 | Autos & Vehicles | Campers & RVs |  | 0.375221 |
| 1 | code_69 | Autos & Vehicles | Classic Vehicles |  | 0.375221 |
| 1 | code_70 | Autos & Vehicles | Commercial Vehicles | Cargo Trucks & Trailers | 0.375221 |
| 1 | code_71 | Autos & Vehicles | Motor Vehicles (By Type) |  | 0.375221 |
| 1 | code_72 | Autos & Vehicles | Motor Vehicles (By Type) | Hybrid & Alternative Vehicles | 0.375221 |
| 1 | code_73 | Autos & Vehicles | Motor Vehicles (By Type) | Motorcycles | 0.375221 |
| 1 | code_74 | Autos & Vehicles | Motor Vehicles (By Type) | Off-Road Vehicles | 0.375221 |
| 1 | code_75 | Autos & Vehicles | Motor Vehicles (By Type) | Trucks & SUVs | 0.375221 |
| 1 | code_76 | Autos & Vehicles | Vehicle Codes & Driving Laws |  | 0.170341 |
| 1 | code_77 | Autos & Vehicles | Vehicle Codes & Driving Laws | Vehicle Licensing & Registration | 0.170341 |
| 1 | code_78 | Autos & Vehicles | Vehicle Parts & Services |  | 0.299548 |
| 3 | code_79 | Autos & Vehicles | Vehicle Parts & Services | Gas Prices & Vehicle Fuelling | 0.457 |
| 1 | code_80 | Autos & Vehicles | Vehicle Parts & Services | Vehicle Parts & Accessories | 0.299548 |
| 1 | code_81 | Autos & Vehicles | Vehicle Parts & Services | Vehicle Repair & Maintenance | 0.297154 |
| 1 | code_82 | Autos & Vehicles | Vehicle Shopping |  | 0.375221 |
| 1 | code_83 | Autos & Vehicles | Vehicle Shopping | Used Vehicles | 0.375221 |
| 1 | code_84 | Autos & Vehicles | Vehicle Shows |  | 0.259202 |
| 1 | code_85 | Beauty & Fitness |  |  | 0.309717 |
| 1 | code_86 | Beauty & Fitness | Beauty Pageants |  | 0.222804 |
| 1 | code_87 | Beauty & Fitness | Body Art |  | 0.291649 |
| 1 | code_88 | Beauty & Fitness | Cosmetic Procedures |  | 0.291649 |
| 1 | code_89 | Beauty & Fitness | Cosmetic Procedures | Cosmetic Surgery | 0.291649 |
| 1 | code_90 | Beauty & Fitness | Cosmetology & Beauty Professionals |  | 0.291649 |
| 1 | code_91 | Beauty & Fitness | Face & Body Care |  | 0.291649 |
| 1 | code_92 | Beauty & Fitness | Face & Body Care | Hygiene & Toiletries | 0.291649 |
| 1 | code_93 | Beauty & Fitness | Face & Body Care | Make-Up & Cosmetics | 0.291649 |
| 1 | code_94 | Beauty & Fitness | Face & Body Care | Perfumes & Fragrances | 0.291649 |
| 1 | code_95 | Beauty & Fitness | Face & Body Care | Skin & Nail Care | 0.291649 |
| 1 | code_96 | Beauty & Fitness | Face & Body Care | Unwanted Body & Facial Hair Removal | 0.291649 |
| 1 | code_97 | Beauty & Fitness | Fashion & Style |  | 0.738472 |
| 1 | code_98 | Beauty & Fitness | Fashion & Style | Fashion Designers & Collections | 0.738472 |
| 1 | code_99 | Beauty & Fitness | Fitness |  | 0.287046 |
| 1 | code_100 | Beauty & Fitness | Hair Care |  | 0.296838 |
| 1 | code_101 | Beauty & Fitness | Hair Care | Hair Loss | 0.296838 |
| 1 | code_102 | Beauty & Fitness | Spas & Beauty Services |  | 0.291649 |
| 1 | code_103 | Beauty & Fitness | Spas & Beauty Services | Massage Therapy | 0.291649 |
| 1 | code_104 | Beauty & Fitness | Weight Loss |  | 0.291932 |
| 1 | code_105 | Books & Literature |  |  | 0.195286 |
| 1 | code_106 | Books & Literature | Children's Literature |  | 0.195286 |
| 1 | code_107 | Books & Literature | E-Books |  | 0.195286 |
| 1 | code_108 | Books & Literature | Fan Fiction |  | 0.195286 |
| 1 | code_109 | Books & Literature | Literary Classics |  | 0.195286 |
| 1 | code_110 | Books & Literature | Poetry |  | 0.195286 |
| 1 | code_111 | Books & Literature | Writers Resources |  | 0.195286 |
| 1 | code_112 | Business & Industrial |  |  | 0.310656 |
| 1 | code_113 | Business & Industrial | Advertising & Marketing | Public Relations | 0.110192 |
| 1 | code_114 | Business & Industrial | Aerospace & Defense | Space Technology | 0.202416 |
| 1 | code_115 | Business & Industrial | Agriculture & Forestry |  | 2.278005 |
| 1 | code_116 | Business & Industrial | Agriculture & Forestry | Agricultural Equipment | 0.423007 |
| 1 | code_117 | Business & Industrial | Agriculture & Forestry | Forestry | 0.327824 |
| 1 | code_118 | Business & Industrial | Agriculture & Forestry | Livestock | 2.314544 |
| 1 | code_119 | Business & Industrial | Automotive Industry |  | 0.309141 |
| 1 | code_120 | Business & Industrial | Business Education |  | 0.10258 |
| 1 | code_121 | Business & Industrial | Business Finance |  | 0.113865 |
| 1 | code_122 | Business & Industrial | Business Finance | Venture Capital | 0.113865 |
| 1 | code_123 | Business & Industrial | Business Operations |  | 0.070301 |
| 1 | code_124 | Business & Industrial | Business Operations | Business Plans & Presentations | 0.108621 |
| 1 | code_125 | Business & Industrial | Business Operations | Management | 0.108621 |
| 1 | code_126 | Business & Industrial | Business Services |  | 0.150649 |
| 1 | code_127 | Business & Industrial | Business Services | Consulting | 0.15233 |
| 1 | code_128 | Business & Industrial | Business Services | Corporate Events | 0.194539 |
| 1 | code_129 | Business & Industrial | Business Services | E-Commerce Services | 0.19147 |
| 1 | code_130 | Business & Industrial | Business Services | Fire & Security Services | 0.153014 |
| 1 | code_131 | Business & Industrial | Business Services | Office Services | 0.152384 |
| 1 | code_132 | Business & Industrial | Business Services | Office Supplies | 0.425337 |
| 1 | code_133 | Business & Industrial | Business Services | Writing & Editing Services | 0.195513 |
| 1 | code_134 | Business & Industrial | Chemicals Industry |  | 1.225531 |
| 1 | code_135 | Business & Industrial | Chemicals Industry | Cleaning Agents | 0.836584 |
| 1 | code_136 | Business & Industrial | Chemicals Industry | Plastics & Polymers | 0.633761 |
| 1 | code_137 | Business & Industrial | Construction & Maintenance |  | 0.333827 |
| 1 | code_138 | Business & Industrial | Construction & Maintenance | Building Materials & Supplies | 0.501233 |
| 3 | code_139 | Business & Industrial | Energy & Utilities |  | - |
| 3 | code_140 | Business & Industrial | Energy & Utilities | Electricity | 0.125 |
| 3 | code_141 | Business & Industrial | Energy & Utilities | Oil & Gas | 1.130 |
| 3 | code_142 | Business & Industrial | Energy & Utilities | Renewable & Alternative Energy | - |
| 1 | code_143 | Business & Industrial | Hospitality Industry |  | 0.307688 |
| 1 | code_144 | Business & Industrial | Hospitality Industry | Event Planning | 0.280247 |
| 1 | code_145 | Business & Industrial | Hospitality Industry | Food Service | 0.31608 |
| 1 | code_146 | Business & Industrial | Industrial Materials & Equipment |  | 0.656415 |
| 1 | code_147 | Business & Industrial | Industrial Materials & Equipment | Heavy Machinery | 0.421459 |
| 1 | code_148 | Business & Industrial | Manufacturing |  | 0.680609 |
| 1 | code_149 | Business & Industrial | Metals & Mining |  | 0.380651 |
| 1 | code_150 | Business & Industrial | Metals & Mining | Precious Metals | 0.761028 |
| 1 | code_151 | Business & Industrial | Pharmaceuticals & Biotech |  | 0.273856 |
| 1 | code_152 | Business & Industrial | Printing & Publishing |  | 0.195286 |
| 1 | code_153 | Business & Industrial | Retail Trade |  | 0.11123 |
| 1 | code_154 | Business & Industrial | Retail Trade | Retail Equipment & Technology | 0.111137 |
| 1 | code_155 | Business & Industrial | Small Business | MLM & Business Opportunities | 0.121549 |
| 1 | code_156 | Business & Industrial | Textiles & Nonwovens |  | 0.762562 |
| 9 | code_157 | Business & Industrial | Transportation & Logistics |  | 1.135895 |
| 9 | code_158 | Business & Industrial | Transportation & Logistics | Freight & Trucking | 0.620678 |
| 9 | code_159 | Business & Industrial | Transportation & Logistics | Mail & Package Delivery | 0.263766 |
| 9 | code_160 | Business & Industrial | Transportation & Logistics | Maritime Transport | 2.406699 |
| 9 | code_161 | Business & Industrial | Transportation & Logistics | Moving & Relocation | 0.620678 |
| 9 | code_162 | Business & Industrial | Transportation & Logistics | Packaging | 0.263766 |
| 9 | code_163 | Business & Industrial | Transportation & Logistics | Parking | 0.339032 |
| 9 | code_164 | Business & Industrial | Transportation & Logistics | Rail Transport | 0.794241 |
| 9 | code_165 | Business & Industrial | Transportation & Logistics | Urban Transport | 0.676149 |
| 1 | code_166 | Computers & Electronics |  |  | 0.250638 |
| 1 | code_167 | Computers & Electronics | CAD & CAM |  | 0.15329 |
| 1 | code_168 | Computers & Electronics | Computer Hardware |  | 0.411838 |
| 1 | code_169 | Computers & Electronics | Computer Hardware | Computer Components | 0.411838 |
| 1 | code_170 | Computers & Electronics | Computer Hardware | Computer Drives & Storage | 0.411838 |
| 1 | code_171 | Computers & Electronics | Computer Hardware | Computer Peripherals | 0.411838 |
| 1 | code_172 | Computers & Electronics | Computer Hardware | Desktop Computers | 0.411838 |
| 1 | code_173 | Computers & Electronics | Computer Hardware | Laptops & Notebooks | 0.411838 |
| 1 | code_174 | Computers & Electronics | Computer Security |  | 0.153359 |
| 1 | code_175 | Computers & Electronics | Computer Security | Hacking & Cracking | 0.153359 |
| 1 | code_176 | Computers & Electronics | Consumer Electronics |  | 0.411838 |
| 1 | code_177 | Computers & Electronics | Consumer Electronics | Audio Equipment | 0.411838 |
| 1 | code_178 | Computers & Electronics | Consumer Electronics | Camera & Photo Equipment | 0.411838 |
| 1 | code_179 | Computers & Electronics | Consumer Electronics | Car Electronics | 0.411838 |
| 1 | code_180 | Computers & Electronics | Consumer Electronics | Drones & RC Aircraft | 0.411838 |
| 1 | code_181 | Computers & Electronics | Consumer Electronics | Game Systems & Consoles | 0.411838 |
| 1 | code_182 | Computers & Electronics | Consumer Electronics | GPS & Navigation | 0.411838 |
| 1 | code_183 | Computers & Electronics | Consumer Electronics | TV & Video Equipment | 0.437809 |
| 1 | code_184 | Computers & Electronics | Electronics & Electrical |  | 0.411838 |
| 1 | code_185 | Computers & Electronics | Electronics & Electrical | Electronic Components | 0.411838 |
| 1 | code_186 | Computers & Electronics | Electronics & Electrical | Power Supplies | 0.411838 |
| 1 | code_187 | Computers & Electronics | Enterprise Technology |  | 0.152469 |
| 1 | code_188 | Computers & Electronics | Enterprise Technology | Data Management | 0.152469 |
| 1 | code_189 | Computers & Electronics | Networking |  | 0.15329 |
| 1 | code_190 | Computers & Electronics | Networking | Data Formats & Protocols | 0.15329 |
| 1 | code_191 | Computers & Electronics | Networking | Network Monitoring & Management | 0.15329 |
| 1 | code_192 | Computers & Electronics | Networking | VPN & Remote Access | 0.15329 |
| 1 | code_193 | Computers & Electronics | Programming |  | 0.15329 |
| 1 | code_194 | Computers & Electronics | Programming | Java (Programming Language) | 0.15329 |
| 1 | code_195 | Computers & Electronics | Software |  | 0.15329 |
| 1 | code_196 | Computers & Electronics | Software | Business & Productivity Software | 0.15329 |
| 1 | code_197 | Computers & Electronics | Software | Device Drivers | 0.15329 |
| 1 | code_198 | Computers & Electronics | Software | Internet Software | 0.15329 |
| 1 | code_199 | Computers & Electronics | Software | Multimedia Software | 0.15329 |
| 1 | code_200 | Computers & Electronics | Software | Operating Systems | 0.15329 |
| 1 | code_201 | Computers & Electronics | Software | Software Utilities | 0.15329 |
| 1 | code_202 | Finance |  |  | 0.102513 |
| 1 | code_203 | Finance | Accounting & Auditing |  | 0.113888 |
| 1 | code_204 | Finance | Accounting & Auditing | Billing & Invoicing | 0.113888 |
| 1 | code_205 | Finance | Accounting & Auditing | Tax Preparation & Planning | 0.113888 |
| 1 | code_206 | Finance | Banking |  | 0.100455 |
| 1 | code_207 | Finance | Credit & Lending |  | 0.113865 |
| 1 | code_208 | Finance | Credit & Lending | Credit Cards | 0.113865 |
| 1 | code_209 | Finance | Credit & Lending | Credit Reporting & Monitoring | 0.113865 |
| 1 | code_210 | Finance | Credit & Lending | Loans | 0.113865 |
| 1 | code_211 | Finance | Financial Planning & Management |  | 0.102753 |
| 1 | code_212 | Finance | Financial Planning & Management | Retirement & Pension | 0.102753 |
| 1 | code_213 | Finance | Grants Scholarships & Financial Aid |  | 0.10596 |
| 1 | code_214 | Finance | Grants Scholarships & Financial Aid | Study Grants & Scholarships | 0.10596 |
| 1 | code_215 | Finance | Insurance |  | 0.088193 |
| 1 | code_216 | Finance | Insurance | Health Insurance | 0.088193 |
| 1 | code_217 | Finance | Investing |  | 0.113865 |
| 1 | code_218 | Finance | Investing | Commodities & Futures Trading | 0.113865 |
| 1 | code_219 | Finance | Investing | Currencies & Foreign Exchange | 0.113865 |
| 1 | code_220 | Finance | Investing | Stocks & Bonds | 0.113865 |
| 1 | code_221 | Food & Drink |  |  | 0.469376 |
| 1 | code_222 | Food & Drink | Beverages |  | 0.552626 |
| 1 | code_223 | Food & Drink | Beverages | Alcoholic Beverages | 0.727946 |
| 1 | code_224 | Food & Drink | Beverages | Coffee & Tea | 0.725362 |
| 1 | code_225 | Food & Drink | Beverages | Juice | 0.42134 |
| 1 | code_226 | Food & Drink | Beverages | Soft Drinks | 0.42134 |
| 1 | code_227 | Food & Drink | Cooking & Recipes |  | 0.758549 |
| 1 | code_228 | Food & Drink | Cooking & Recipes | BBQ & Grilling | 0.811989 |
| 1 | code_229 | Food & Drink | Cooking & Recipes | Desserts | 0.735321 |
| 1 | code_230 | Food & Drink | Cooking & Recipes | Soups & Stews | 0.811989 |
| 1 | code_231 | Food & Drink | Food |  | 0.758549 |
| 1 | code_232 | Food & Drink | Food & Grocery Retailers |  | 0.758549 |
| 1 | code_233 | Food & Drink | Food | Baked Goods | 0.734311 |
| 1 | code_234 | Food & Drink | Food | Breakfast Foods | 0.735321 |
| 1 | code_235 | Food & Drink | Food | Candy & Sweets | 0.81948 |
| 1 | code_236 | Food & Drink | Food | Grains & Pasta | 0.747368 |
| 1 | code_237 | Food & Drink | Food | Meat & Seafood | 0.803618 |
| 1 | code_238 | Food & Drink | Food | Snack Foods | 0.756658 |
| 1 | code_239 | Food & Drink | Restaurants |  | 0.31608 |
| 1 | code_240 | Food & Drink | Restaurants | Fast Food | 0.31608 |
| 1 | code_241 | Food & Drink | Restaurants | Pizzerias | 0.31608 |
| 1 | code_242 | Food & Drink | Restaurants | Restaurant Reviews & Reservations | 0.31608 |
| 1 | code_243 | Games |  |  | 0.219961 |
| 1 | code_244 | Games | Arcade & Coin-Op Games |  | 0.222804 |
| 1 | code_245 | Games | Board Games |  | 0.222804 |
| 1 | code_246 | Games | Board Games | Chess & Abstract Strategy Games | 0.222804 |
| 1 | code_247 | Games | Board Games | Miniatures & Wargaming | 0.222804 |
| 1 | code_248 | Games | Card Games |  | 0.222804 |
| 1 | code_249 | Games | Card Games | Collectible Card Games | 0.222804 |
| 1 | code_250 | Games | Card Games | Poker & Casino Games | 0.094973 |
| 1 | code_251 | Games | Computer & Video Games |  | 0.279959 |
| 1 | code_252 | Games | Computer & Video Games | Casual Games | 0.279959 |
| 1 | code_253 | Games | Computer & Video Games | Driving & Racing Games | 0.279959 |
| 1 | code_254 | Games | Computer & Video Games | Fighting Games | 0.279959 |
| 1 | code_255 | Games | Computer & Video Games | Music & Dance Games | 0.279959 |
| 1 | code_256 | Games | Computer & Video Games | Sandbox Games | 0.279959 |
| 1 | code_257 | Games | Computer & Video Games | Shooter Games | 0.279959 |
| 1 | code_258 | Games | Computer & Video Games | Simulation Games | 0.279959 |
| 1 | code_259 | Games | Computer & Video Games | Sports Games | 0.279959 |
| 1 | code_260 | Games | Computer & Video Games | Strategy Games | 0.279959 |
| 1 | code_261 | Games | Computer & Video Games | Video Game Emulation | 0.279959 |
| 1 | code_262 | Games | Family-Oriented Games & Activities |  | 0.222804 |
| 1 | code_263 | Games | Family-Oriented Games & Activities | Drawing & Coloring | 0.222804 |
| 1 | code_264 | Games | Family-Oriented Games & Activities | Dress-Up & Fashion Games | 0.222804 |
| 1 | code_265 | Games | Gambling |  | 0.094973 |
| 1 | code_266 | Games | Gambling | Lottery | 0.094973 |
| 1 | code_267 | Games | Online Games | Massively Multiplayer Games | 0.279959 |
| 1 | code_268 | Games | Puzzles & Brainteasers |  | 0.222804 |
| 1 | code_269 | Games | Roleplaying Games |  | 0.222804 |
| 1 | code_270 | Games | Table Games |  | 0.222804 |
| 1 | code_271 | Games | Table Games | Billiards | 0.222804 |
| 1 | code_272 | Games | Word Games |  | 0.222804 |
| 1 | code_273 | Health |  |  | 0.258847 |
| 1 | code_274 | Health | Aging & Geriatrics |  | 0.260433 |
| 1 | code_275 | Health | Health Conditions |  | 0.306182 |
| 1 | code_276 | Health | Health Conditions | AIDS & HIV | 0.306182 |
| 1 | code_277 | Health | Health Conditions | Allergies | 0.306182 |
| 1 | code_278 | Health | Health Conditions | Arthritis | 0.306182 |
| 1 | code_279 | Health | Health Conditions | Cancer | 0.306182 |
| 1 | code_280 | Health | Health Conditions | Diabetes | 0.306182 |
| 1 | code_281 | Health | Health Conditions | Ear Nose & Throat | 0.306182 |
| 1 | code_282 | Health | Health Conditions | Eating Disorders | 0.306182 |
| 1 | code_283 | Health | Health Conditions | Endocrine Conditions | 0.306182 |
| 1 | code_284 | Health | Health Conditions | Genetic Disorders | 0.306182 |
| 1 | code_285 | Health | Health Conditions | Heart & Hypertension | 0.306182 |
| 1 | code_286 | Health | Health Conditions | Infectious Diseases | 0.306182 |
| 1 | code_287 | Health | Health Conditions | Neurological Conditions | 0.306182 |
| 1 | code_288 | Health | Health Conditions | Obesity | 0.306182 |
| 1 | code_289 | Health | Health Conditions | Pain Management | 0.306182 |
| 1 | code_290 | Health | Health Conditions | Respiratory Conditions | 0.306182 |
| 1 | code_291 | Health | Health Conditions | Skin Conditions | 0.306182 |
| 1 | code_292 | Health | Health Conditions | Sleep Disorders | 0.306182 |
| 1 | code_293 | Health | Health Education & Medical Training |  | 0.275678 |
| 1 | code_294 | Health | Health Foundations & Medical Research |  | 0.275678 |
| 1 | code_295 | Health | Medical Devices & Equipment |  | 0.299749 |
| 1 | code_296 | Health | Medical Facilities & Services |  | 0.299749 |
| 1 | code_297 | Health | Medical Facilities & Services | Doctors' Offices | 0.291932 |
| 1 | code_298 | Health | Medical Facilities & Services | Hospitals & Treatment Centers | 0.291932 |
| 1 | code_299 | Health | Medical Facilities & Services | Medical Procedures | 0.291932 |
| 1 | code_300 | Health | Medical Facilities & Services | Physical Therapy | 0.291932 |
| 1 | code_301 | Health | Men's Health |  | 0.306182 |
| 1 | code_302 | Health | Mental Health |  | 0.306182 |
| 1 | code_303 | Health | Mental Health | Anxiety & Stress | 0.306182 |
| 1 | code_304 | Health | Mental Health | Depression | 0.306182 |
| 1 | code_305 | Health | Nursing |  | 0.291932 |
| 1 | code_306 | Health | Nursing | Assisted Living & Long Term Care | 0.27296 |
| 1 | code_307 | Health | Nutrition |  | 0.306182 |
| 1 | code_308 | Health | Nutrition | Special & Restricted Diets | 0.306182 |
| 1 | code_309 | Health | Nutrition | Vitamins & Supplements | 0.306182 |
| 1 | code_310 | Health | Oral & Dental Care |  | 0.31269 |
| 1 | code_311 | Health | Pharmacy |  | 0.306182 |
| 1 | code_312 | Health | Pharmacy | Drugs & Medications | 0.306182 |
| 1 | code_313 | Health | Public Health |  | 0.291932 |
| 1 | code_314 | Health | Public Health | Occupational Health & Safety | 0.291932 |
| 1 | code_315 | Health | Reproductive Health |  | 0.306182 |
| 1 | code_316 | Health | Substance Abuse |  | 0.306182 |
| 1 | code_317 | Health | Substance Abuse | Drug & Alcohol Testing | 0.288524 |
| 1 | code_318 | Health | Substance Abuse | Drug & Alcohol Treatment | 0.285968 |
| 1 | code_319 | Health | Substance Abuse | Smoking & Smoking Cessation | 0.306182 |
| 1 | code_320 | Health | Substance Abuse | Steroids & Performance-Enhancing Drugs | 0.306182 |
| 1 | code_321 | Health | Vision Care |  | 0.31269 |
| 1 | code_322 | Health | Vision Care | Eyeglasses & Contacts | 0.31269 |
| 1 | code_323 | Health | Women's Health |  | 0.306182 |
| 1 | code_324 | Hobbies & Leisure |  |  | 0.327003 |
| 1 | code_325 | Hobbies & Leisure | Clubs & Organizations |  | 0.175955 |
| 1 | code_326 | Hobbies & Leisure | Clubs & Organizations | Youth Organizations & Resources | 0.175955 |
| 1 | code_327 | Hobbies & Leisure | Crafts |  | 0.749917 |
| 1 | code_328 | Hobbies & Leisure | Crafts | Fiber & Textile Arts | 0.749917 |
| 1 | code_329 | Hobbies & Leisure | Merit Prizes & Contests |  | 0.221568 |
| 1 | code_330 | Hobbies & Leisure | Outdoors |  | 0.222804 |
| 1 | code_331 | Hobbies & Leisure | Outdoors | Fishing | 0.222804 |
| 1 | code_332 | Hobbies & Leisure | Outdoors | Hiking & Camping | 0.222804 |
| 1 | code_333 | Hobbies & Leisure | Paintball |  | 0.222804 |
| 1 | code_334 | Hobbies & Leisure | Radio Control & Modeling |  | 0.391751 |
| 1 | code_335 | Hobbies & Leisure | Radio Control & Modeling | Model Trains & Railroads | 0.391751 |
| 1 | code_336 | Hobbies & Leisure | Special Occasions |  | 0.250713 |
| 1 | code_337 | Hobbies & Leisure | Special Occasions | Holidays & Seasonal Events | 0.250713 |
| 1 | code_338 | Hobbies & Leisure | Special Occasions | Weddings | 0.269648 |
| 1 | code_339 | Hobbies & Leisure | Water Activities |  | 0.222804 |
| 1 | code_340 | Hobbies & Leisure | Water Activities | Boating | 0.230317 |
| 1 | code_341 | Hobbies & Leisure | Water Activities | Surf & Swim | 0.222804 |
| 1 | code_342 | Home & Garden |  |  | 0.162967 |
| 1 | code_343 | Home & Garden | Bed & Bath |  | 0.115391 |
| 1 | code_344 | Home & Garden | Bed & Bath | Bathroom | 0.115391 |
| 1 | code_345 | Home & Garden | Domestic Services |  | 0.038032 |
| 1 | code_346 | Home & Garden | Domestic Services | Cleaning Services | 0.038032 |
| 1 | code_347 | Home & Garden | Gardening & Landscaping |  | 0.099156 |
| 1 | code_348 | Home & Garden | Home & Interior Decor |  | 0.057796 |
| 1 | code_349 | Home & Garden | Home Appliances |  | 0.074543 |
| 1 | code_350 | Home & Garden | Home Furnishings |  | 0.057578 |
| 1 | code_351 | Home & Garden | Home Furnishings | Curtains & Window Treatments | 0.057578 |
| 1 | code_352 | Home & Garden | Home Furnishings | Kitchen & Dining Furniture | 0.057578 |
| 1 | code_353 | Home & Garden | Home Furnishings | Lamps & Lighting | 0.064357 |
| 1 | code_354 | Home & Garden | Home Furnishings | Living Room Furniture | 0.057578 |
| 1 | code_355 | Home & Garden | Home Furnishings | Rugs & Carpets | 0.084417 |
| 1 | code_356 | Home & Garden | Home Improvement |  | 0.103608 |
| 1 | code_357 | Home & Garden | Home Improvement | Construction & Power Tools | 0.108453 |
| 1 | code_358 | Home & Garden | Home Improvement | Doors & Windows | 0.103619 |
| 1 | code_359 | Home & Garden | Home Improvement | Flooring | 0.103619 |
| 1 | code_360 | Home & Garden | Home Improvement | House Painting & Finishing | 0.041905 |
| 1 | code_361 | Home & Garden | Home Improvement | Plumbing | 0.103608 |
| 1 | code_362 | Home & Garden | Home Safety & Security |  | 0.099156 |
| 1 | code_363 | Home & Garden | Home Storage & Shelving |  | 0.1154 |
| 1 | code_364 | Home & Garden | Home Swimming Pools Saunas & Spas |  | 0.099169 |
| 1 | code_365 | Home & Garden | HVAC & Climate Control |  | 0.103514 |
| 1 | code_366 | Home & Garden | HVAC & Climate Control | Fireplaces & Stoves | 0.103514 |
| 1 | code_367 | Home & Garden | Kitchen & Dining |  | 0.133682 |
| 1 | code_368 | Home & Garden | Kitchen & Dining | Cookware & Diningware | 0.061086 |
| 1 | code_369 | Home & Garden | Kitchen & Dining | Major Kitchen Appliances | 0.047058 |
| 1 | code_370 | Home & Garden | Kitchen & Dining | Small Kitchen Appliances | 0.047058 |
| 1 | code_371 | Home & Garden | Laundry |  | 0.047058 |
| 1 | code_372 | Home & Garden | Laundry | Washers & Dryers | 0.047058 |
| 1 | code_373 | Home & Garden | Nursery & Playroom |  | 0.115475 |
| 1 | code_374 | Home & Garden | Pest Control |  | 0.039885 |
| 1 | code_375 | Home & Garden | Yard & Patio |  | 0.110967 |
| 1 | code_376 | Home & Garden | Yard & Patio | Lawn Mowers | 0.108356 |
| 1 | code_377 | Internet & Telecom |  |  | 0.231717 |
| 1 | code_378 | Internet & Telecom | Communications Equipment |  | 0.296539 |
| 1 | code_379 | Internet & Telecom | Communications Equipment | Radio Equipment | 0.296539 |
| 1 | code_380 | Internet & Telecom | Email & Messaging |  | 0.17321 |
| 1 | code_381 | Internet & Telecom | Email & Messaging | Text & Instant Messaging | 0.17321 |
| 1 | code_382 | Internet & Telecom | Email & Messaging | Voice & Video Chat | 0.17321 |
| 1 | code_383 | Internet & Telecom | Mobile & Wireless |  | 0.27693 |
| 1 | code_384 | Internet & Telecom | Mobile & Wireless | Mobile & Wireless Accessories | 0.27693 |
| 1 | code_385 | Internet & Telecom | Mobile & Wireless | Mobile Apps & Add-Ons | 0.27693 |
| 1 | code_386 | Internet & Telecom | Mobile & Wireless | Mobile Phones | 0.27683 |
| 1 | code_387 | Internet & Telecom | Service Providers |  | 0.17321 |
| 1 | code_388 | Internet & Telecom | Service Providers | Cable & Satellite Providers | 0.17321 |
| 1 | code_389 | Internet & Telecom | Web Services |  | 0.15329 |
| 1 | code_390 | Internet & Telecom | Web Services | Affiliate Programs | 0.15329 |
| 1 | code_391 | Internet & Telecom | Web Services | Web Design & Development | 0.15329 |
| 1 | code_392 | Jobs & Education |  |  | 0.102602 |
| 1 | code_393 | Jobs & Education | Education |  | 0.10258 |
| 1 | code_394 | Jobs & Education | Education | Colleges & Universities | 0.10258 |
| 1 | code_395 | Jobs & Education | Education | Distance Learning | 0.10258 |
| 1 | code_396 | Jobs & Education | Education | Homeschooling | 0.10258 |
| 1 | code_397 | Jobs & Education | Education | Primary & Secondary Schooling (K-12) | 0.10258 |
| 1 | code_398 | Jobs & Education | Education | Standardized & Admissions Tests | 0.10258 |
| 1 | code_399 | Jobs & Education | Education | Teaching & Classroom Resources | 0.10258 |
| 1 | code_400 | Jobs & Education | Education | Training & Certification | 0.10258 |
| 1 | code_401 | Jobs & Education | Education | Vocational & Continuing Education | 0.10258 |
| 1 | code_402 | Jobs & Education | Jobs |  | 0.117628 |
| 1 | code_403 | Jobs & Education | Jobs | Career Resources & Planning | 0.117628 |
| 1 | code_404 | Jobs & Education | Jobs | Job Listings | 0.113208 |
| 1 | code_405 | Jobs & Education | Jobs | Resumes & Portfolios | 0.117628 |
| 1 | code_406 | Law & Government |  |  | 0 |
| 1 | code_407 | Law & Government | Government |  | 0 |
| 1 | code_408 | Law & Government | Government | Courts & Judiciary | 0 |
| 1 | code_409 | Law & Government | Government | Visa & Immigration | 0 |
| 1 | code_410 | Law & Government | Legal |  | 0 |
| 1 | code_411 | Law & Government | Legal | Bankruptcy | 0 |
| 1 | code_412 | Law & Government | Legal | Legal Education | 0 |
| 1 | code_413 | Law & Government | Legal | Legal Services | 0 |
| 1 | code_414 | Law & Government | Military |  | 0 |
| 1 | code_415 | Law & Government | Public Safety |  | 0 |
| 1 | code_416 | Law & Government | Public Safety | Crime & Justice | 0 |
| 1 | code_417 | Law & Government | Public Safety | Emergency Services | 0 |
| 1 | code_418 | Law & Government | Public Safety | Law Enforcement | 0 |
| 1 | code_419 | Law & Government | Public Safety | Security Products & Services | 0 |
| 1 | code_420 | Law & Government | Social Services |  | 0 |
| 1 | code_421 | News |  |  | 0.1609 |
| 1 | code_422 | News | Business News |  | 0.1609 |
| 1 | code_423 | News | Business News | Company News | 0.1609 |
| 1 | code_424 | News | Business News | Financial Markets News | 0.1609 |
| 1 | code_425 | News | Gossip & Tabloid News | Scandals & Investigations | 0.1609 |
| 1 | code_426 | News | Health News |  | 0.1609 |
| 1 | code_427 | News | Politics |  | 0.1609 |
| 1 | code_428 | News | Sports News |  | 0.1609 |
| 1 | code_429 | News | Weather |  | 0.1609 |
| 1 | code_430 | Online Communities |  |  | 0 |
| 1 | code_431 | Online Communities | Blogging Resources & Services |  | 0 |
| 1 | code_432 | Online Communities | Dating & Personals |  | 0 |
| 1 | code_433 | Online Communities | Dating & Personals | Matrimonial Services | 0 |
| 1 | code_434 | Online Communities | Dating & Personals | Personals | 0 |
| 1 | code_435 | Online Communities | Dating & Personals | Photo Rating Sites | 0 |
| 1 | code_436 | Online Communities | File Sharing & Hosting |  | 0 |
| 1 | code_437 | Online Communities | Online Goodies |  | 0 |
| 1 | code_438 | Online Communities | Online Goodies | Clip Art & Animated GIFs | 0 |
| 1 | code_439 | Online Communities | Online Goodies | Skins Themes & Wallpapers | 0 |
| 1 | code_440 | Online Communities | Online Goodies | Social Network Apps & Add-Ons | 0 |
| 1 | code_441 | Online Communities | Photo & Video Sharing |  | 0 |
| 1 | code_442 | Online Communities | Photo & Video Sharing | Photo & Image Sharing | 0 |
| 1 | code_443 | Online Communities | Social Networks |  | 0 |
| 1 | code_444 | Online Communities | Virtual Worlds |  | 0 |
| 1 | code_445 | People & Society |  |  | 0 |
| 1 | code_446 | People & Society | Family & Relationships |  | 0 |
| 1 | code_447 | People & Society | Family & Relationships | Family | 0 |
| 1 | code_448 | People & Society | Family & Relationships | Marriage | 0 |
| 1 | code_449 | People & Society | Family & Relationships | Troubled Relationships | 0 |
| 1 | code_450 | People & Society | Kids & Teens |  | 0 |
| 1 | code_451 | People & Society | Kids & Teens | Children's Interests | 0 |
| 1 | code_452 | People & Society | Kids & Teens | Teen Interests | 0 |
| 1 | code_453 | People & Society | Religion & Belief |  | 0 |
| 1 | code_454 | People & Society | Seniors & Retirement |  | 0 |
| 1 | code_455 | People & Society | Social Issues & Advocacy |  | 0 |
| 1 | code_456 | People & Society | Social Issues & Advocacy | Charity & Philanthropy | 0 |
| 1 | code_457 | People & Society | Social Issues & Advocacy | Discrimination & Identity Relations | 0 |
| 1 | code_458 | People & Society | Social Issues & Advocacy | Green Living & Environmental Issues | 0 |
| 1 | code_459 | People & Society | Social Issues & Advocacy | Human Rights & Liberties | 0 |
| 1 | code_460 | People & Society | Social Issues & Advocacy | Poverty & Hunger | 0 |
| 1 | code_461 | People & Society | Social Issues & Advocacy | Work & Labor Issues | 0 |
| 1 | code_462 | People & Society | Social Sciences |  | 0 |
| 1 | code_463 | People & Society | Social Sciences | Economics | 0 |
| 1 | code_464 | People & Society | Social Sciences | Political Science | 0 |
| 1 | code_465 | People & Society | Social Sciences | Psychology | 0 |
| 1 | code_466 | People & Society | Subcultures & Niche Interests |  | 0 |
| 1 | code_467 | Pets & Animals |  |  | 0.49728 |
| 1 | code_468 | Pets & Animals | Animal Products & Services | Pet Food & Supplies | 0.49728 |
| 1 | code_469 | Pets & Animals | Animal Products & Services | Veterinarians | 0.08693 |
| 1 | code_470 | Pets & Animals | Pets |  | 0.08693 |
| 1 | code_471 | Pets & Animals | Pets | Birds | 0.08693 |
| 1 | code_472 | Pets & Animals | Pets | Cats | 0.08693 |
| 1 | code_473 | Pets & Animals | Pets | Dogs | 0.08693 |
| 1 | code_474 | Pets & Animals | Pets | Exotic Pets | 0.08693 |
| 1 | code_475 | Pets & Animals | Pets | Fish & Aquaria | 0.08693 |
| 1 | code_476 | Pets & Animals | Pets | Horses | 0.08693 |
| 1 | code_477 | Pets & Animals | Pets | Rabbits & Rodents | 0.08693 |
| 1 | code_478 | Pets & Animals | Pets | Reptiles & Amphibians | 0.08693 |
| 1 | code_479 | Pets & Animals | Wildlife |  | 0.08693 |
| 1 | code_480 | Real Estate |  |  | 0.084914 |
| 1 | code_481 | Real Estate | Real Estate Listings |  | 0.084914 |
| 1 | code_482 | Real Estate | Real Estate Listings | Bank-Owned & Foreclosed Properties | 0.084914 |
| 1 | code_483 | Real Estate | Real Estate Listings | Commercial Properties | 0.084914 |
| 1 | code_484 | Real Estate | Real Estate Listings | Lots & Land | 0.084914 |
| 1 | code_485 | Real Estate | Real Estate Listings | Residential Rentals | 0.084914 |
| 1 | code_486 | Real Estate | Real Estate Listings | Residential Sales | 0.084914 |
| 1 | code_487 | Real Estate | Real Estate Listings | Timeshares & Vacation Properties | 0.084914 |
| 1 | code_488 | Real Estate | Real Estate Services |  | 0.084914 |
| 1 | code_489 | Reference |  |  | 0 |
| 1 | code_490 | Reference | Directories & Listings |  | 0 |
| 1 | code_491 | Reference | Directories & Listings | Business & Personal Listings | 0 |
| 1 | code_492 | Reference | General Reference |  | 0 |
| 1 | code_493 | Reference | General Reference | Biographies & Quotations | 0 |
| 1 | code_494 | Reference | General Reference | Calculators & Reference Tools | 0 |
| 1 | code_495 | Reference | General Reference | Dictionaries & Encyclopedias | 0 |
| 1 | code_496 | Reference | General Reference | Forms Guides & Templates | 0 |
| 1 | code_497 | Reference | General Reference | Public Records | 0 |
| 1 | code_498 | Reference | General Reference | Time & Calendars | 0 |
| 1 | code_499 | Reference | Geographic Reference |  | 0 |
| 1 | code_500 | Reference | Geographic Reference | Maps | 0 |
| 1 | code_501 | Reference | Humanities |  | 0 |
| 1 | code_502 | Reference | Humanities | History | 0 |
| 1 | code_503 | Reference | Humanities | Myth & Folklore | 0 |
| 1 | code_504 | Reference | Humanities | Philosophy | 0 |
| 1 | code_505 | Reference | Language Resources |  | 0 |
| 1 | code_506 | Reference | Language Resources | Foreign Language Resources | 0 |
| 1 | code_507 | Reference | Libraries & Museums |  | 0 |
| 1 | code_508 | Reference | Libraries & Museums | Museums | 0 |
| 1 | code_509 | Science |  |  | 0.185857 |
| 1 | code_510 | Science | Astronomy |  | 0.185857 |
| 1 | code_511 | Science | Biological Sciences |  | 0.185857 |
| 1 | code_512 | Science | Biological Sciences | Neuroscience | 0.185857 |
| 1 | code_513 | Science | Chemistry |  | 0.185857 |
| 1 | code_514 | Science | Computer Science |  | 0.185857 |
| 1 | code_515 | Science | Earth Sciences |  | 0.185857 |
| 1 | code_516 | Science | Earth Sciences | Atmospheric Science | 0.185857 |
| 1 | code_517 | Science | Earth Sciences | Geology | 0.185857 |
| 1 | code_518 | Science | Ecology & Environment |  | 0.185857 |
| 1 | code_519 | Science | Ecology & Environment | Climate Change & Global Warming | 0.185857 |
| 1 | code_520 | Science | Engineering & Technology |  | 0.185857 |
| 1 | code_521 | Science | Engineering & Technology | Robotics | 0.185857 |
| 1 | code_522 | Science | Mathematics |  | 0.185857 |
| 1 | code_523 | Science | Mathematics | Statistics | 0.185857 |
| 1 | code_524 | Science | Physics |  | 0.185857 |
| 1 | code_525 | Science | Scientific Institutions |  | 0.185857 |
| 1 | code_526 | Sensitive Subjects |  |  | 0.265295 |
| 1 | code_527 | Shopping |  |  | 0.40695 |
| 1 | code_528 | Shopping | Antiques & Collectibles |  | 0.524893 |
| 1 | code_529 | Shopping | Apparel |  | 0.72111 |
| 1 | code_530 | Shopping | Apparel | Athletic Apparel | 0.736107 |
| 1 | code_531 | Shopping | Apparel | Casual Apparel | 0.729235 |
| 1 | code_532 | Shopping | Apparel | Children's Clothing | 0.729235 |
| 1 | code_533 | Shopping | Apparel | Clothing Accessories | 0.729235 |
| 1 | code_534 | Shopping | Apparel | Costumes | 0.729235 |
| 1 | code_535 | Shopping | Apparel | Eyewear | 0.736107 |
| 1 | code_536 | Shopping | Apparel | Footwear | 0.718746 |
| 1 | code_537 | Shopping | Apparel | Formal Wear | 0.736107 |
| 1 | code_538 | Shopping | Apparel | Headwear | 0.736107 |
| 1 | code_539 | Shopping | Apparel | Men's Clothing | 0.729235 |
| 1 | code_540 | Shopping | Apparel | Swimwear | 0.736107 |
| 1 | code_541 | Shopping | Apparel | Undergarments | 0.736107 |
| 1 | code_542 | Shopping | Apparel | Women's Clothing | 0.729235 |
| 1 | code_543 | Shopping | Auctions |  | 0.50949 |
| 1 | code_544 | Shopping | Classifieds |  | 0.110192 |
| 1 | code_545 | Shopping | Consumer Resources |  | 0 |
| 1 | code_546 | Shopping | Consumer Resources | Consumer Advocacy & Protection | 0 |
| 1 | code_547 | Shopping | Consumer Resources | Coupons & Discount Offers | 0 |
| 1 | code_548 | Shopping | Consumer Resources | Product Reviews & Price Comparisons | 0 |
| 1 | code_549 | Shopping | Entertainment Media |  | 0.222358 |
| 1 | code_550 | Shopping | Entertainment Media | Entertainment Media Rentals | 0.136983 |
| 1 | code_551 | Shopping | Gifts & Special Event Items |  | 0.508223 |
| 1 | code_552 | Shopping | Gifts & Special Event Items | Cards & Greetings | 0.75558 |
| 1 | code_553 | Shopping | Gifts & Special Event Items | Flowers | 0.193032 |
| 1 | code_554 | Shopping | Gifts & Special Event Items | Gifts | 0.508223 |
| 1 | code_555 | Shopping | Luxury Goods |  | 0.627033 |
| 1 | code_556 | Shopping | Mass Merchants & Department Stores |  | 0.486517 |
| 1 | code_557 | Shopping | Photo & Video Services |  | 0.436448 |
| 1 | code_558 | Shopping | Tobacco Products |  | 1.005129 |
| 1 | code_559 | Shopping | Toys |  | 0.619265 |
| 1 | code_560 | Shopping | Toys | Building Toys | 0.619265 |
| 1 | code_561 | Shopping | Toys | Die-cast & Toy Vehicles | 0.619265 |
| 1 | code_562 | Shopping | Toys | Dolls & Accessories | 0.619265 |
| 1 | code_563 | Shopping | Toys | Ride-On Toys & Wagons | 0.619265 |
| 1 | code_564 | Shopping | Toys | Stuffed Toys | 0.619265 |
| 1 | code_565 | Sports |  |  | 0.175955 |
| 1 | code_566 | Sports | Animal Sports |  | 0.175955 |
| 1 | code_567 | Sports | College Sports |  | 0.175955 |
| 1 | code_568 | Sports | Combat Sports |  | 0.175955 |
| 1 | code_569 | Sports | Combat Sports | Boxing | 0.175955 |
| 1 | code_570 | Sports | Combat Sports | Martial Arts | 0.175955 |
| 1 | code_571 | Sports | Combat Sports | Wrestling | 0.175955 |
| 1 | code_572 | Sports | Extreme Sports |  | 0.175955 |
| 1 | code_573 | Sports | Extreme Sports | Drag & Street Racing | 0.175955 |
| 1 | code_574 | Sports | Fantasy Sports |  | 0.175955 |
| 1 | code_575 | Sports | Individual Sports |  | 0.175955 |
| 1 | code_576 | Sports | Individual Sports | Cycling | 0.175955 |
| 1 | code_577 | Sports | Individual Sports | Golf | 0.175955 |
| 1 | code_578 | Sports | Individual Sports | Gymnastics | 0.175955 |
| 1 | code_579 | Sports | Individual Sports | Racquet Sports | 0.175955 |
| 1 | code_580 | Sports | Individual Sports | Skate Sports | 0.175955 |
| 1 | code_581 | Sports | Individual Sports | Track & Field | 0.175955 |
| 1 | code_582 | Sports | International Sports Competitions |  | 0.222804 |
| 1 | code_583 | Sports | International Sports Competitions | Olympics | 0.222804 |
| 1 | code_584 | Sports | Motor Sports |  | 0.222804 |
| 1 | code_585 | Sports | Sporting Goods |  | 0.222804 |
| 1 | code_586 | Sports | Sporting Goods | Sports Memorabilia | 0.222804 |
| 1 | code_587 | Sports | Sporting Goods | Winter Sports Equipment | 0.222804 |
| 1 | code_588 | Sports | Sports Coaching & Training |  | 0.175955 |
| 1 | code_589 | Sports | Team Sports |  | 0.175955 |
| 1 | code_590 | Sports | Team Sports | American Football | 0.175955 |
| 1 | code_591 | Sports | Team Sports | Australian Football | 0.175955 |
| 1 | code_592 | Sports | Team Sports | Baseball | 0.175955 |
| 1 | code_593 | Sports | Team Sports | Basketball | 0.175955 |
| 1 | code_594 | Sports | Team Sports | Cheerleading | 0.175955 |
| 1 | code_595 | Sports | Team Sports | Cricket | 0.175955 |
| 1 | code_596 | Sports | Team Sports | Hockey | 0.175955 |
| 1 | code_597 | Sports | Team Sports | Rugby | 0.175955 |
| 1 | code_598 | Sports | Team Sports | Soccer | 0.175955 |
| 1 | code_599 | Sports | Team Sports | Volleyball | 0.175955 |
| 1 | code_600 | Sports | Water Sports |  | 0.175955 |
| 1 | code_601 | Sports | Water Sports | Surfing | 0.175955 |
| 1 | code_602 | Sports | Water Sports | Swimming | 0.175955 |
| 1 | code_603 | Sports | Winter Sports |  | 0.175955 |
| 1 | code_604 | Sports | Winter Sports | Ice Skating | 0.175955 |
| 1 | code_605 | Sports | Winter Sports | Skiing & Snowboarding | 0.175955 |
| 6 | code_606 | Travel |  |  | 0.601042 |
| 6 | code_607 | Travel | Air Travel |  | 0.947955 |
| 6 | code_608 | Travel | Air Travel | Airport Parking & Transportation | 0.620678 |
| 6 | code_609 | Travel | Bus & Rail |  | 0.676149 |
| 6 | code_610 | Travel | Car Rental & Taxi Services |  | 0.313692 |
| 6 | code_611 | Travel | Cruises & Charters |  | 1.069828 |
| 6 | code_612 | Travel | Hotels & Accommodations |  | 0.269648 |
| 6 | code_613 | Travel | Hotels & Accommodations | Vacation Rentals & Short-Term Stays | 0.269648 |
| 6 | code_614 | Travel | Specialty Travel |  | 1.042665 |
| 1 | code_615 | Travel | Tourist Destinations |  | 0.269648 |
| 1 | code_616 | Travel | Tourist Destinations | Beaches & Islands | 0.250713 |
| 1 | code_617 | Travel | Tourist Destinations | Mountain & Ski Resorts | 0.250713 |
| 1 | code_618 | Travel | Tourist Destinations | Regional Parks & Gardens | 0.250713 |
| 1 | code_619 | Travel | Tourist Destinations | Theme Parks | 0.250713 |
| 1 | code_620 | Travel | Tourist Destinations | Zoos-Aquariums-Preserves | 0.250713 |
| 1 | code_901 | Payroll |  |  | 0 |
| 1 | code_902 | Industry adjustment |  |  | 0 |
| 1 | code_903 | Business & Industrial | Energy & Utilities | Water | 0.34626 |
| 5 | code_904 | Business & Industrial | Energy & Utilities | Waste & Recycling | 1.392327 |

Table S5. Industry interquartile and median emissions estimates by Scope 3 category.

| **SIC** | **Description** | **Category 1. Purchased Goods and Services** | | | **Category 3. Fuel and energy-related activities** | | | **Category 6. Business Travel** | | | **Category 9. Downstream transportation and distribution** | | |
| --- | --- | --- | --- | --- | --- | --- | --- | --- | --- | --- | --- | --- | --- |
|  |  | **Lower 25%** | **Median** | **Upper 25%** | **Lower 25%** | **Median** | **Upper 25%** | **Lower 25%** | **Median** | **Upper 25%** | **Lower 25%** | **Median** | **Upper 25%** |
|  |  | ***kg Co2e*** | ***kg Co2e*** | ***kg Co2e*** | ***kg Co2e*** | ***kg Co2e*** | ***kg Co2e*** | ***kg Co2e*** | ***kg Co2e*** | ***kg Co2e*** | ***kg Co2e*** | ***kg Co2e*** | ***kg Co2e*** |
| **2** | **Forestry and logging** | **14,775** | **36,494** | **92,710** | **6,582** | **2,812** | **3,551** | **573** | **1,196** | **2,417** | **72** | **533** | **2,342** |
| **3** | **Fishing and aquaculture** | **38,438** | **91,763** | **235,545** | **3,330** | **1,504** | **2,328** | **590** | **1,373** | **3,114** | **20** | **217** | **960** |
| **8** | **Other mining and quarrying** | **61,734** | **142,245** | **460,682** | **-** | **-** | **-** | **771** | **1,511** | **3,557** | **423** | **3,815** | **18,208** |
| **10** | **Manufacture of food products** | **36,631** | **119,011** | **444,999** | **16,261** | **4,960** | **13,469** | **224** | **646** | **1,423** | **227** | **2,125** | **12,001** |
| **11** | **Manufacture of beverages** | **40,461** | **91,025** | **256,189** | **11,316** | **4,529** | **8,309** | **368** | **788** | **1,555** | **533** | **2,579** | **8,908** |
| **13** | **Manufacture of textiles** | **15,526** | **46,066** | **136,682** | **4,089** | **1,914** | **2,889** | **257** | **594** | **1,509** | **62** | **555** | **5,916** |
| **14** | **Manufacture of wearing apparel** | **23,537** | **57,946** | **174,765** | **321** | **168** | **874** | **228** | **443** | **980** | **125** | **677** | **7,893** |
| **16** | **Manufacture of wood products** | **18,194** | **45,484** | **146,029** | **4,562** | **2,195** | **3,406** | **455** | **899** | **1,773** | **32** | **265** | **2,469** |
| **17** | **Manufacture of paper and paper products** | **43,798** | **153,379** | **605,264** | **1,103** | **268** | **3,762** | **355** | **1,105** | **2,084** | **1,050** | **10,550** | **55,218** |
| **18** | **Printing and reproduction of recorded media** | **15,249** | **35,972** | **102,040** | **4,870** | **2,666** | **4,033** | **229** | **563** | **1,498** | **125** | **1,034** | **5,327** |
| **20** | **Manufacture of chemicals and chemical products** | **26,841** | **107,952** | **471,067** | **20,404** | **5,361** | **8,463** | **296** | **836** | **1,926** | **468** | **4,040** | **23,130** |
| **22** | **Manufacture of rubber and plastic products** | **57,893** | **179,101** | **482,234** | **14,978** | **5,208** | **10,213** | **466** | **1,102** | **2,457** | **261** | **2,185** | **12,810** |
| **23** | **Manufacture of other non-metallic mineral products** | **18,655** | **62,304** | **203,942** | **10,465** | **3,013** | **5,311** | **423** | **900** | **2,168** | **72** | **876** | **5,665** |
| **24** | **Manufacture of basic metals** | **33,110** | **107,509** | **270,454** | **14,710** | **5,745** | **8,641** | **555** | **1,184** | **2,430** | **224** | **1,559** | **7,482** |
| **25** | **Manufacture of fabricated metal products** | **22,842** | **63,454** | **189,120** | **7,941** | **3,006** | **5,319** | **491** | **1,072** | **2,189** | **59** | **490** | **3,281** |
| **26** | **Manufacture of computer, electronic and optical products** | **24,177** | **75,631** | **247,600** | **10,374** | **2,787** | **5,336** | **296** | **888** | **2,050** | **159** | **1,794** | **8,294** |
| **27** | **Manufacture of electrical equipment** | **17,797** | **46,999** | **146,190** | **5,938** | **2,293** | **3,496** | **522** | **1,121** | **2,269** | **31** | **395** | **4,160** |
| **28** | **Manufacture of machinery and equipment nec** | **40,104** | **110,142** | **318,705** | **11,343** | **4,454** | **6,916** | **586** | **1,361** | **2,874** | **275** | **1,920** | **8,512** |
| **29** | **Manufacture of motor vehicles, trailers and semi-trailers** | **11,888** | **37,870** | **130,836** | **5,469** | **2,192** | **3,852** | **388** | **1,034** | **2,041** | **84** | **1,045** | **5,443** |
| **30** | **Manufacture of other transport equipment** | **13,365** | **34,844** | **120,090** | **4,386** | **2,457** | **3,969** | **792** | **1,883** | **4,175** | **54** | **662** | **4,850** |
| **31** | **Manufacture of furniture** | **15,254** | **42,819** | **141,293** | **5,973** | **2,485** | **4,151** | **448** | **975** | **2,087** | **65** | **514** | **4,180** |
| **32** | **Other manufacturing** | **16,921** | **42,163** | **143,456** | **4,065** | **1,786** | **2,898** | **254** | **687** | **1,672** | **170** | **926** | **5,998** |
| **33** | **Repair and installation of machinery and equipment** | **20,960** | **51,066** | **142,329** | **4,587** | **2,124** | **2,770** | **675** | **1,582** | **2,658** | **29** | **217** | **1,386** |
| **41** | **Construction of buildings** | **15,364** | **40,698** | **122,924** | **3,286** | **1,590** | **2,700** | **381** | **858** | **1,778** | **25** | **198** | **1,334** |
| **42** | **Civil engineering** | **18,210** | **48,492** | **139,961** | **4,408** | **2,002** | **2,840** | **598** | **1,239** | **2,409** | **42** | **358** | **2,233** |
| **43** | **Specialised construction activities** | **13,450** | **28,170** | **73,652** | **2,569** | **1,245** | **1,625** | **488** | **990** | **1,898** | **10** | **59** | **469** |
| **45** | **Wholesale and retail trade and repair of motor vehicles and motorcycles** | **14,222** | **36,068** | **96,459** | **4,249** | **2,224** | **2,750** | **323** | **774** | **1,768** | **28** | **138** | **971** |
| **46** | **Wholesale trade, except of motor vehicles and motorcycles** | **52,040** | **180,582** | **548,907** | **10,511** | **4,339** | **5,739** | **393** | **1,038** | **2,423** | **712** | **5,397** | **24,791** |
| **47** | **Retail trade, except of motor vehicles and motorcycles** | **24,199** | **71,096** | **191,738** | **4,289** | **2,156** | **2,999** | **166** | **437** | **1,023** | **78** | **496** | **3,006** |
| **50** | **Water transport** | **5,125** | **11,808** | **55,610** | **-** | **-** | **-** | **8,201** | **33,299** | **137,604** | **123** | **671** | **73,971** |
| **52** | **Warehousing and support activities for transportation** | **5,129** | **16,400** | **61,304** | **5,876** | **2,029** | **3,546** | **354** | **972** | **2,535** | **22,690** | **62,107** | **187,310** |
| **53** | **Postal and courier activities** | **2,072** | **4,934** | **14,173** | **-** | **-** | **-** | **567** | **1,322** | **2,652** | **4,385** | **9,790** | **33,981** |
| **55** | **Accommodation** | **4,621** | **11,020** | **33,709** | **6,616** | **3,382** | **5,354** | **4,507** | **10,474** | **26,066** | **7** | **27** | **199** |
| **56** | **Food and beverage service activities** | **25,801** | **53,762** | **102,561** | **7,507** | **4,154** | **5,788** | **141** | **360** | **863** | **12** | **70** | **439** |
| **58** | **Publishing activities** | **9,364** | **20,899** | **58,822** | **400** | **162** | **803** | **232** | **585** | **1,550** | **63** | **340** | **3,643** |
| **59** | **Motion picture, video and television programme production, sound recording and music publishing activities** | **7,122** | **14,088** | **30,434** | **837** | **467** | **1,058** | **502** | **1,124** | **2,286** | **10** | **34** | **137** |
| **61** | **Telecommunications** | **12,432** | **28,862** | **119,672** | **660** | **189** | **1,735** | **471** | **1,207** | **2,538** | **24** | **140** | **897** |
| **62** | **Computer programming, consultancy and related activities** | **9,392** | **21,596** | **75,025** | **1,302** | **588** | **1,359** | **219** | **520** | **1,259** | **17** | **78** | **523** |
| **63** | **Information service activities** | **7,757** | **30,426** | **106,424** | **759** | **353** | **1,572** | **282** | **526** | **1,165** | **24** | **123** | **1,182** |
| **71** | **Architectural and engineering activities; technical testing and analysis** | **9,002** | **19,284** | **59,104** | **2,710** | **1,333** | **2,014** | **391** | **866** | **1,853** | **14** | **53** | **422** |
| **72** | **Scientific research and development** | **12,229** | **39,817** | **127,896** | **848** | **365** | **2,221** | **473** | **1,034** | **2,132** | **74** | **459** | **2,430** |
| **73** | **Advertising and market research** | **9,054** | **20,462** | **59,042** | **1,804** | **943** | **1,524** | **317** | **765** | **1,639** | **18** | **73** | **504** |
| **74** | **Other professional, scientific and technical activities** | **7,254** | **15,137** | **34,994** | **1,374** | **795** | **1,140** | **298** | **675** | **1,340** | **13** | **38** | **175** |
| **75** | **Veterinary activities** | **37,349** | **92,700** | **171,194** | **1,834** | **1,005** | **3,405** | **223** | **580** | **1,370** | **43** | **136** | **423** |
| **78** | **Employment activities** | **13,247** | **37,702** | **122,458** | **2,533** | **1,071** | **1,586** | **370** | **951** | **1,896** | **18** | **73** | **561** |
| **81** | **Services to buildings and landscape activities** | **3,505** | **7,809** | **19,591** | **2,465** | **1,178** | **1,468** | **385** | **811** | **1,595** | **8** | **35** | **233** |
| **82** | **Office administrative, office support and other business support activities** | **7,137** | **16,234** | **52,524** | **2,530** | **1,308** | **1,818** | **292** | **707** | **1,570** | **19** | **108** | **1,085** |
| **84** | **Public administration and defence; compulsory social security** | **6,604** | **17,150** | **53,743** | **-** | **-** | **-** | **774** | **1,368** | **2,666** | **14** | **81** | **905** |
| **85** | **Education** | **8,996** | **38,942** | **136,825** | **20,921** | **3,077** | **11,874** | **191** | **501** | **1,212** | **16** | **52** | **194** |
| **86** | **Human health activities** | **20,237** | **75,946** | **181,254** | **3,956** | **1,954** | **3,401** | **144** | **367** | **846** | **16** | **51** | **216** |
| **87** | **Residential care activities** | **40,211** | **86,473** | **188,570** | **17,127** | **8,492** | **12,196** | **182** | **540** | **1,417** | **16** | **75** | **311** |
| **88** | **Social work activities without accommodation** | **3,612** | **12,765** | **35,725** | **4,863** | **2,683** | **3,610** | **134** | **350** | **833** | **15** | **68** | **342** |
| **90** | **Creative, arts and entertainment activities** | **6,238** | **12,782** | **29,861** | **1,622** | **878** | **1,408** | **323** | **762** | **1,536** | **16** | **62** | **364** |
| **91** | **Libraries, archives, museums and other cultural activities** | **9,956** | **24,551** | **65,550** | **668** | **258** | **2,464** | **184** | **617** | **1,449** | **63** | **265** | **1,666** |
| **93** | **Sports activities and amusement and recreation activities** | **6,562** | **14,967** | **40,242** | **3,849** | **1,587** | **3,227** | **203** | **513** | **1,246** | **14** | **70** | **369** |
| **94** | **Activities of membership organisations** | **4,619** | **13,591** | **55,344** | **335** | **149** | **777** | **190** | **557** | **1,480** | **25** | **106** | **396** |
| **96** | **Other personal service activities** | **6,739** | **11,080** | **19,178** | **1,364** | **883** | **1,139** | **86** | **216** | **487** | **6** | **26** | **114** |
