# Supplementary material for: Completing the SME Carbon Profile: Scalable Prediction of Scope 3 Emissions
Source: Research Square preprint supplement (doi:10.21203/rs.3.rs-8241893/v1), 2025-12-04
Supplement: Supplementary file 5 [file c9c6c1815354b62f562a2e76.docx]

# Supporting Information S4 – Stability Results and Binomial Logistic Regression Details

This Supporting Information provides the full test and train results to assess model performance and stability along with binomial model specifications and a summary table of average model performance metrics across all iterations.

Table S6. Performance Metrics for preferred models Test and Train Iterations

|  |  | **Mean** | | **Median** | |
| --- | --- | --- | --- | --- | --- |
| **Fold** | **RSQ** | **AE** | **APE** | **AE** | **APE** |
|  |  | ***kg Co2e*** | ***kg Co2e*** | ***kg Co2e*** | ***kg Co2e*** |
| **Category 1.** |  |  |  |  |  |
| 1 | 0.88 | 55.14 | 63.49 | 8.47 | 28.18 |
| 2 | 0.88 | 52.42 | 67.07 | 8.60 | 28.45 |
| 3 | 0.88 | 57.83 | 74.46 | 8.51 | 28.36 |
| 4 | 0.88 | 55.95 | 70.08 | 8.56 | 28.22 |
| 5 | 0.88 | 56.14 | 110.54 | 8.51 | 28.40 |
|  |  |  |  |  |  |
| **Mean** | 0.88 | 55.50 | 77.13 | 8.53 | 28.32 |
| **Std** | 0.000 | 1.978 | 19.107 | 0.050 | 0.117 |
|  |  |  |  |  |  |
| **Category 3.1** | |  |  |  |  |
| 1 | 0.71 | 4.88 | 77.17 | 1.01 | 48.26 |
| 2 | 0.71 | 4.88 | 76.96 | 1.03 | 49.23 |
| 3 | 0.71 | 4.88 | 75.97 | 1.02 | 48.73 |
| 4 | 0.72 | 4.87 | 75.98 | 1.03 | 48.61 |
| 5 | 0.71 | 4.62 | 76.17 | 1.01 | 47.99 |
|  |  |  |  |  |  |
| **Mean** | 0.71 | 4.83 | 76.45 | 1.02 | 48.56 |
| **Std** | 0.004 | 0.115 | 0.572 | 0.010 | 0.473 |
|  |  |  |  |  |  |
| **Category 3.2** | |  |  |  |  |
| 1 | 0.74 | 0.86 | 73.34 | 0.21 | 48.93 |
| 2 | 0.73 | 0.87 | 74.30 | 0.21 | 48.94 |
| 3 | 0.73 | 0.84 | 73.74 | 0.21 | 48.86 |
| 4 | 0.73 | 0.85 | 74.78 | 0.21 | 48.45 |
| 5 | 0.73 | 0.85 | 73.49 | 0.21 | 48.11 |
|  |  |  |  |  |  |
| **Mean** | 0.73 | 0.85 | 73.93 | 0.21 | 48.66 |
| **Std** | 0.004 | 0.011 | 0.599 | 0.000 | 0.367 |
|  |  |  |  |  |  |
| **Category 6** |  |  |  |  |  |
| 1 | 0.44 | 1.31 | 128.27 | 0.42 | 59.12 |
| 2 | 0.44 | 1.33 | 129.69 | 0.43 | 59.18 |
| 3 | 0.44 | 1.47 | 131.61 | 0.43 | 59.04 |
| 4 | 0.44 | 1.39 | 129.64 | 0.42 | 59.11 |
| 5 | 0.44 | 1.32 | 134.24 | 0.43 | 59.84 |
|  |  |  |  |  |  |
| **Mean** | 0.44 | 1.36 | 130.69 | 0.43 | 59.26 |
| **Std** | 0.000 | 0.067 | 2.313 | 0.005 | 0.329 |
|  |  |  |  |  |  |
| **Category 9** |  |  |  |  |  |
| 1 | 0.47 | 7.19 | 552.10 | 0.18 | 93.47 |
| 2 | 0.47 | 6.51 | 560.20 | 0.18 | 93.91 |
| 3 | 0.47 | 7.47 | 550.28 | 0.18 | 93.88 |
| 4 | 0.47 | 6.00 | 543.39 | 0.18 | 93.84 |
| 5 | 0.47 | 7.05 | 542.22 | 0.19 | 93.74 |
|  |  |  |  |  |  |
| **Mean** | 0.47 | 6.84 | 549.64 | 0.18 | 93.77 |
| **Std** | 0.000 | 0.587 | 7.282 | 0.004 | 0.179 |
|  |  |  |  |  |  |

## Model Specifications: Binomial Logistic Models

Model 4:

Model 5:

Where:

is the log odds of the probability of the outcome variable Y for firm i in industry j. Here, Y = 1 indicates the presence of a hotspot, while Y = 0 denotes its absence

represents the variable effect for industry j

represents the fixed coefficients for firm turnover

Table S7. Model summary metrics for all 624 regression iterations.

|  | | **Model 4** | **Model 5** |
| --- | --- | --- | --- |
|  |  |
| **AIC** | **Min** | 173.87 | 26.66 |
| **Average** | 5,126.82 | 4,855.61 |
| **Max** | 126,246.72 | 125,772.00 |
|  |  |  |  |
| **Median Residual** | **Min** | -0.11 | -0.07 |
| **Average** | -0.00 | -0.00 |
| **Max** | -0.00 | -0.00 |
|  |  |  |  |
| **Log Likelihood** | **Min** | -63,122.36 | -62,882.00 |
| **Average** | -2,562.41 | -2,423.80 |
| **Max** | -85.93 | -9.33 |
|  |  |  |  |
| **Deviance** | **Min** | 14.68 | 12.51 |
| **Average** | 4,907.07 | 4,762.27 |
| **Max** | 125,830.96 | 125,288.32 |
|  |  |  |  |

To convert the predicted log odds into probabilities we use the formula below, this allows us to produce Supporting Information S4:
