# Supplementary material for: Completing the SME Carbon Profile: Scalable Prediction of Scope 3 Emissions
Source: Research Square preprint supplement (doi:10.21203/rs.3.rs-8241893/v1), 2025-12-04
Supplement: Supplementary file 6 [file f5ff6d893b51559c80a831b6.xlsx]

## Sheet: CoverSheet
SUPPORTING INFORMATION FOR:
Phillpotts, A., Owen, A., Norman, J., Trendl, A., Gathergood, J., Jobst, N., Leake, D. Completing the SME Carbon Profile: Scalable Prediction of Scope 3 Emissions. Journal of Industrial Ecology
This supporting information provides the underlying data used to produce Figures 2. We also provide underlying data for Figures S2, S3 and S4 for Supporting Information S1.

## Sheet: Table S1
Table S1. Underlying data for Figure 2 in the main text
SIC_2_2007	SIC Section	Industry Categories	Firm_codes_25%	Firm_codes_median	Firm_codes_75%	Firm_emissions_25%	Firm_emissions_median	Firm_emissions_75%
2	A	5	2	2	3	0.638522	0.735109	0.808074
3	A	5	1	1	2	0.811515	0.882576	0.928652
8	B	5	1	2	3	0.604772	0.730126	0.803054
10	C	5	2	2	3	0.695973	0.784336	0.860196
11	C	5	1	2	3	0.611496	0.708255	0.789279
13	C	6	2	2	3	0.667513	0.766097	0.842826
14	C	5	1	2	2	0.734571	0.803262	0.869462
15	C	4	1	2	2	0.710178	0.795821	0.859572
16	C	5	2	2	3	0.704485	0.78614	0.851802
17	C	5	1	2	3	0.656592	0.755938	0.840758
18	C	6	2	2	3	0.56137	0.654918	0.75812
20	C	5	1	2	2	0.651666	0.744708	0.839959
22	C	5	2	2	3	0.674736	0.762165	0.852487
23	C	6	1	2	3	0.668838	0.755398	0.835094
24	C	6	2	2	3	0.631115	0.728787	0.80767
25	C	6	1	2	3	0.64358	0.742631	0.825558
26	C	5	1	2	3	0.601691	0.72023	0.813336
27	C	6	2	2	3	0.620698	0.728714	0.810169
28	C	5	1	2	3	0.619874	0.725585	0.810817
29	C	6	2	2	3	0.579404	0.685235	0.789286
30	C	5	2	2	3	0.576461	0.68969	0.798177
31	C	6	2	2.5	3	0.567238	0.674899	0.759382
32	C	5	2	2	3	0.627017	0.729191	0.813533
33	C	5	1	2	3	0.665008	0.733393	0.808272
41	F	6	2	2	3	0.712456	0.789956	0.856239
42	F	6	2	2	3	0.687782	0.76567	0.832072
43	F	6	2	2	3	0.699515	0.776511	0.840232
45	G	6	1	2	3	0.656459	0.752906	0.834669
46	G	6	1	2	3	0.682068	0.781546	0.866989
47	G	7	1	2	3	0.691098	0.798331	0.88262
50	H	4	1	1	2	0.768658	0.840419	0.893163
52	H	6	1	2	2	0.743656	0.829203	0.895418
55	I	5	2	2	3	0.619059	0.715745	0.798446
56	I	6	2	2	3	0.745148	0.825095	0.887804
58	J	6	2	2	3	0.627527	0.720651	0.797058
59	J	5	2	2	3	0.590681	0.687584	0.77573
60	J	6	2	2	3	0.62524	0.718766	0.793103
61	J	5	2	2	3	0.631101	0.727764	0.797378
62	J	6	2	2	3	0.628901	0.720151	0.802464
63	J	5	2	2	3	0.688754	0.780315	0.852609
71	M	6	2	2	3	0.601411	0.705083	0.791701
72	M	5	2	2	3	0.608602	0.694574	0.775824
73	M	5	2	3	3	0.558197	0.658385	0.752474
74	M	6	2	2	3	0.649464	0.734665	0.805221
75	M	5	2	2	3	0.554486	0.640917	0.732498
78	N	6	2	2	3	0.603434	0.706812	0.797688
81	N	7	2	3	4	0.587978	0.684052	0.766497
82	N	6	2	2	3	0.619417	0.718912	0.804679
84	O	4	2	3	3	0.509643	0.608929	0.702743
85	P	6	1	2	3	0.657965	0.771586	0.854731
86	Q	6	1	2	2	0.692381	0.772898	0.841529
87	Q	5	1	2	2	0.592782	0.699507	0.797535
88	Q	8	2	3	3	0.547582	0.665631	0.779944
90	R	6	2	2	3	0.608	0.702777	0.786302
91	R	5	2	2	3	0.542924	0.667148	0.77079
93	R	7	2	2	3	0.571951	0.680312	0.773467
94	S	5	2	2	3	0.648796	0.758462	0.865735
96	S	6	1	2	3	0.676243	0.758206	0.832225

## Sheet: Table S2
Table S2. Underlying data for Figure S2 in supporting information S1
pre_restriction_account_usage_interval	pre_restriction_account_usage_midpoint	pre_restriction_account_usage_proportion	post_restriction_account_usage_interval	post_restriction_account_usage_midpoint	post_restriction_account_usage_proportion
(-0.0277, 0.141]	0.05665	0.251877	(0.00102, 0.0195]	0.01026	0.0120434
(0.141, 0.281]	0.211	0.233551	(0.0195, 0.0348]	0.02715	0.0261279
(0.281, 0.422]	0.3515	0.158127	(0.0348, 0.0502]	0.0425	0.0276744
(0.422, 0.562]	0.492	0.101853	(0.0502, 0.0656]	0.0579	0.026961
(0.562, 0.703]	0.6325	0.0686473	(0.0656, 0.081]	0.0733	0.0278618
(0.703, 0.843]	0.773	0.0465215	(0.081, 0.0964]	0.0887	0.0285127
(0.843, 0.984]	0.9135	0.0325401	(0.0964, 0.112]	0.1042	0.0295228
(0.984, 1.124]	1.054	0.0226496	(0.112, 0.127]	0.1195	0.0284346
(1.124, 1.264]	1.194	0.0169872	(0.127, 0.142]	0.1345	0.0279191
(1.264, 1.405]	1.3345	0.0132414	(0.142, 0.158]	0.15	0.0279139
(1.405, 1.545]	1.475	0.0101358	(0.158, 0.173]	0.1655	0.0287209
(1.545, 1.686]	1.6155	0.00816517	(0.173, 0.189]	0.181	0.0280701
(1.686, 1.826]	1.756	0.00588274	(0.189, 0.204]	0.1965	0.0277837
(1.826, 1.967]	1.8965	0.00507621	(0.204, 0.219]	0.2115	0.0258988
(1.967, 2.107]	2.037	0.0038373	(0.219, 0.235]	0.227	0.0256489
(2.107, 2.248]	2.1775	0.00332178	(0.235, 0.25]	0.2425	0.0238838
(2.248, 2.388]	2.318	0.00265243	(0.25, 0.265]	0.2575	0.0232798
(2.388, 2.528]	2.458	0.00211197	(0.265, 0.281]	0.273	0.0237901
(2.528, 2.669]	2.5985	0.00194151	(0.281, 0.296]	0.2885	0.0224259
(2.669, 2.809]	2.739	0.00160476	(0.296, 0.312]	0.304	0.0215719
(2.809, 2.95]	2.8795	0.0012597	(0.312, 0.327]	0.3195	0.0205618
(2.95, 3.09]	3.02	0.00122644	(0.327, 0.342]	0.3345	0.0191143
(3.09, 3.231]	3.1605	0.000918789	(0.342, 0.358]	0.35	0.0188279
(3.231, 3.371]	3.301	0.000715076	(0.358, 0.373]	0.3655	0.0176616
(3.371, 3.512]	3.4415	0.000561251	(0.373, 0.388]	0.3805	0.0174794
(3.512, 3.652]	3.582	0.000569566	(0.388, 0.404]	0.396	0.0172971
(3.652, 3.793]	3.7225	0.000465631	(0.404, 0.419]	0.4115	0.01611
(3.793, 3.933]	3.863	0.000361695	(0.419, 0.435]	0.427	0.015657
(3.933, 4.073]	4.003	0.000357538	(0.435, 0.45]	0.4425	0.0151207
(4.073, 4.214]	4.1435	0.000332593	(0.45, 0.465]	0.4575	0.0148759
(4.214, 4.354]	4.284	0.000270232	(0.465, 0.481]	0.473	0.0138554
(4.354, 4.495]	4.4245	0.000174611	(0.481, 0.496]	0.4885	0.0131889
(4.495, 4.635]	4.565	0.000232815	(0.496, 0.512]	0.504	0.0125901
(4.635, 4.776]	4.7055	0.000174611	(0.512, 0.527]	0.5195	0.0118039
(4.776, 4.916]	4.846	0.000166297	(0.527, 0.542]	0.5345	0.0113613
(4.916, 5.057]	4.9865	0.000120565	(0.542, 0.558]	0.55	0.0108563
(5.057, 5.197]	5.127	0.000116408	(0.558, 0.573]	0.5655	0.0101221
(5.197, 5.337]	5.267	0.00011225	(0.573, 0.588]	0.5805	0.00955976
(5.337, 5.478]	5.4075	8.73057e-05	(0.588, 0.604]	0.596	0.00933587
(5.478, 5.618]	5.548	7.89909e-05	(0.604, 0.619]	0.6115	0.00877353
(5.618, 5.759]	5.6885	7.06761e-05	(0.619, 0.635]	0.627	0.00799771
(5.759, 5.899]	5.829	5.40464e-05	(0.635, 0.65]	0.6425	0.00748744
(5.899, 6.04]	5.9695	6.23612e-05	(0.65, 0.665]	0.6575	0.0072323
(6.04, 6.18]	6.11	5.40464e-05	(0.665, 0.681]	0.673	0.00679493
(6.18, 6.321]	6.2505	3.74167e-05	(0.681, 0.696]	0.6885	0.00665434
(6.321, 6.461]	6.391	7.06761e-05	(0.696, 0.711]	0.7035	0.00690948
(6.461, 6.601]	6.531	3.74167e-05	(0.711, 0.727]	0.719	0.00619093
(6.601, 6.742]	6.6715	8.73057e-05	(0.727, 0.742]	0.7345	0.0060139
(6.742, 6.882]	6.812	2.91019e-05	(0.742, 0.758]	0.75	0.00584208
(6.882, 7.023]	6.9525	4.15742e-05	(0.758, 0.773]	0.7655	0.00535784
(7.023, 7.163]	7.093	2.49445e-05	(0.773, 0.788]	0.7805	0.00566504
(7.163, 7.304]	7.2335	2.07871e-05	(0.788, 0.804]	0.796	0.0054776
(7.304, 7.444]	7.374	2.49445e-05	(0.804, 0.819]	0.8115	0.00450392
(7.444, 7.585]	7.5145	3.74167e-05	(0.819, 0.834]	0.8265	0.00485278
(7.585, 7.725]	7.655	1.66297e-05	(0.834, 0.85]	0.842	0.00468616
(7.725, 7.866]	7.7955	2.91019e-05	(0.85, 0.865]	0.8575	0.00422275
(7.866, 8.006]	7.936	2.07871e-05	(0.865, 0.881]	0.873	0.00435292
(8.006, 8.146]	8.076	1.24722e-05	(0.881, 0.896]	0.8885	0.00416547
(8.146, 8.287]	8.2165	8.31483e-06	(0.896, 0.911]	0.9035	0.0039572
(8.287, 8.427]	8.357	1.24722e-05	(0.911, 0.927]	0.919	0.00370727
(8.427, 8.568]	8.4975	2.07871e-05	(0.927, 0.942]	0.9345	0.00370727
(8.568, 8.708]	8.638	1.66297e-05	(0.942, 0.957]	0.9495	0.00336362
(8.708, 8.849]	8.7785	4.15742e-06	(0.957, 0.973]	0.965	0.00314493
(8.849, 8.989]	8.919	8.31483e-06	(0.973, 0.988]	0.9805	0.00297831
(8.989, 9.13]	9.0595	2.07871e-05	(0.988, 1.004]	0.996	0.00275963
(9.13, 9.27]	9.2	8.31483e-06	(1.004, 1.019]	1.0115	0.00268673
(9.27, 9.41]	9.34	1.24722e-05	(1.019, 1.034]	1.0265	0.00235349
(9.41, 9.551]	9.4805	4.15742e-06	(1.034, 1.05]	1.042	0.00241597
(9.551, 9.691]	9.621	4.15742e-06	(1.05, 1.065]	1.0575	0.00223374
(9.691, 9.832]	9.7615	8.31483e-06	(1.065, 1.08]	1.0725	0.00207753
(9.832, 9.972]	9.902	4.15742e-06	(1.08, 1.096]	1.088	0.00189529
(9.972, 10.113]	10.0425	0	(1.096, 1.111]	1.1035	0.00192653
(10.113, 10.253]	10.183	4.15742e-06	(1.111, 1.127]	1.119	0.00204108
(10.253, 10.394]	10.3235	0	(1.127, 1.142]	1.1345	0.00208274
(10.394, 10.534]	10.464	4.15742e-06	(1.142, 1.157]	1.1495	0.00173909
(10.534, 10.674]	10.604	0	(1.157, 1.173]	1.165	0.00181198
(10.674, 10.815]	10.7445	0	(1.173, 1.188]	1.1805	0.00160891
(10.815, 10.955]	10.885	8.31483e-06	(1.188, 1.203]	1.1955	0.00148916
(10.955, 11.096]	11.0255	4.15742e-06	(1.203, 1.219]	1.211	0.00172867
(11.096, 11.236]	11.166	0	(1.219, 1.234]	1.2265	0.00182239
(11.236, 11.377]	11.3065	8.31483e-06	(1.234, 1.25]	1.242	0.00158809
(11.377, 11.517]	11.447	0	(1.25, 1.265]	1.2575	0.00142667
(11.517, 11.658]	11.5875	4.15742e-06	(1.265, 1.28]	1.2725	0.00139543
(11.658, 11.798]	11.728	0	(1.28, 1.296]	1.288	0.0012913
(11.798, 11.939]	11.8685	4.15742e-06	(1.296, 1.311]	1.3035	0.00148395
(11.939, 12.079]	12.009	0	(1.311, 1.326]	1.3185	0.00143188
(12.079, 12.219]	12.149	4.15742e-06	(1.326, 1.342]	1.334	0.00141105
(12.219, 12.36]	12.2895	4.15742e-06	(1.342, 1.357]	1.3495	0.00134337
(12.36, 12.5]	12.43	8.31483e-06	(1.357, 1.373]	1.365	0.00133816
(12.5, 12.641]	12.5705	0	(1.373, 1.388]	1.3805	0.0012913
(12.641, 12.781]	12.711	4.15742e-06	(1.388, 1.403]	1.3955	0.00128609
(12.781, 12.922]	12.8515	4.15742e-06	(1.403, 1.419]	1.411	0.00118716
(12.922, 13.062]	12.992	0	(1.419, 1.434]	1.4265	0.00107261
(13.062, 13.203]	13.1325	0	(1.434, 1.449]	1.4415	0.00109864
(13.203, 13.343]	13.273	0	(1.449, 1.465]	1.457	0.00109864
(13.343, 13.483]	13.413	0	(1.465, 1.48]	1.4725	0.00101533
(13.483, 13.624]	13.5535	8.31483e-06	(1.48, 1.496]	1.488	0.00104137
(13.624, 13.764]	13.694	0	(1.496, 1.511]	1.5035	0.00105699
(13.764, 13.905]	13.8345	4.15742e-06	(1.511, 1.526]	1.5185	0.000984093
(13.905, 14.045]	13.975	0	(1.526, 1.542]	1.534	0.000911197
(14.045, 14.186]	14.1155	0	(1.542, 1.557]	1.5495	0.00108302
(14.186, 14.326]	14.256	0	(1.557, 1.572]	1.5645	0.000879956
(14.326, 14.467]	14.3965	0	(1.572, 1.588]	1.58	0.000900784
(14.467, 14.607]	14.537	0	(1.588, 1.603]	1.5955	0.000864336
(14.607, 14.747]	14.677	4.15742e-06	(1.603, 1.619]	1.611	0.000895577
(14.747, 14.888]	14.8175	0	(1.619, 1.634]	1.6265	0.000952852
(14.888, 15.028]	14.958	0	(1.634, 1.649]	1.6415	0.000775819
(15.028, 15.169]	15.0985	0	(1.649, 1.665]	1.657	0.000765406
(15.169, 15.309]	15.239	0	(1.665, 1.68]	1.6725	0.00069251
(15.309, 15.45]	15.3795	0	(1.68, 1.695]	1.6875	0.000687303
(15.45, 15.59]	15.52	0	(1.695, 1.711]	1.703	0.000744578
(15.59, 15.731]	15.6605	0	(1.711, 1.726]	1.7185	0.000536305
(15.731, 15.871]	15.801	0	(1.726, 1.742]	1.734	0.000567546
(15.871, 16.012]	15.9415	0	(1.742, 1.757]	1.7495	0.00049465
(16.012, 16.152]	16.082	0	(1.757, 1.772]	1.7645	0.000614407
(16.152, 16.292]	16.222	0	(1.772, 1.788]	1.78	0.000499857
(16.292, 16.433]	16.3625	0	(1.788, 1.803]	1.7955	0.000390513
(16.433, 16.573]	16.503	4.15742e-06	(1.803, 1.818]	1.8105	0.000400927
(16.573, 16.714]	16.6435	0	(1.818, 1.834]	1.826	0.000421754
(16.714, 16.854]	16.784	4.15742e-06	(1.834, 1.849]	1.8415	0.000473823
(16.854, 16.995]	16.9245	0	(1.849, 1.865]	1.857	0.000426961
(16.995, 17.135]	17.065	0	(1.865, 1.88]	1.8725	0.000442582
(17.135, 17.276]	17.2055	0	(1.88, 1.895]	1.8875	0.000458202
(17.276, 17.416]	17.346	4.15742e-06	(1.895, 1.911]	1.903	0.000380099
(17.416, 17.556]	17.486	0	(1.911, 1.926]	1.9185	0.000369686
(17.556, 17.697]	17.6265	0	(1.926, 1.941]	1.9335	0.000281169
(17.697, 17.837]	17.767	0	(1.941, 1.957]	1.949	0.000177033
(17.837, 17.978]	17.9075	0	(1.957, 1.972]	1.9645	0.000203067
(17.978, 18.118]	18.048	0	(1.972, 1.988]	1.98	0.000177033
(18.118, 18.259]	18.1885	0	(1.988, 2.003]	1.9955	0.000177033
(18.259, 18.399]	18.329	0	(2.003, 2.018]	2.0105	0.000192653
(18.399, 18.54]	18.4695	0	(2.018, 2.034]	2.026	9.893e-05
(18.54, 18.68]	18.61	0	(2.034, 2.049]	2.0415	9.37232e-05
(18.68, 18.82]	18.75	0	(2.049, 2.064]	2.0565	0.000145792
(18.82, 18.961]	18.8905	0	(2.064, 2.08]	2.072	0.000119757
(18.961, 19.101]	19.031	0	(2.08, 2.095]	2.0875	0.000124964
(19.101, 19.242]	19.1715	0	(2.095, 2.111]	2.103	0.000177033
(19.242, 19.382]	19.312	0	(2.111, 2.126]	2.1185	8.85163e-05
(19.382, 19.523]	19.4525	0	(2.126, 2.141]	2.1335	9.893e-05
(19.523, 19.663]	19.593	0	(2.141, 2.157]	2.149	0.000104137
(19.663, 19.804]	19.7335	0	(2.157, 2.172]	2.1645	8.33095e-05
(19.804, 19.944]	19.874	0	(2.172, 2.187]	2.1795	8.33095e-05
(19.944, 20.084]	20.014	4.15742e-06	(2.187, 2.203]	2.195	0.000104137
(20.084, 20.225]	20.1545	0	(2.203, 2.218]	2.2105	9.37232e-05
(20.225, 20.365]	20.295	0	(2.218, 2.234]	2.226	9.37232e-05
(20.365, 20.506]	20.4355	0	(2.234, 2.249]	2.2415	0.000104137
(20.506, 20.646]	20.576	0	(2.249, 2.264]	2.2565	3.64479e-05
(20.646, 20.787]	20.7165	0	(2.264, 2.28]	2.272	8.33095e-05
(20.787, 20.927]	20.857	0	(2.28, 2.295]	2.2875	5.20684e-05
(20.927, 21.068]	20.9975	0	(2.295, 2.311]	2.303	2.08274e-05
(21.068, 21.208]	21.138	0	(2.311, 2.326]	2.3185	3.64479e-05
(21.208, 21.349]	21.2785	0	(2.326, 2.341]	2.3335	1.56205e-05
(21.349, 21.489]	21.419	0	(2.341, 2.357]	2.349	5.72753e-05
(21.489, 21.629]	21.559	0	(2.357, 2.372]	2.3645	2.60342e-05
(21.629, 21.77]	21.6995	4.15742e-06	(2.372, 2.387]	2.3795	1.56205e-05
(21.77, 21.91]	21.84	0	(2.387, 2.403]	2.395	3.64479e-05
(21.91, 22.051]	21.9805	0	(2.403, 2.418]	2.4105	5.20684e-05
(22.051, 22.191]	22.121	0	(2.418, 2.434]	2.426	1.04137e-05
(22.191, 22.332]	22.2615	0	(2.434, 2.449]	2.4415	1.04137e-05
(22.332, 22.472]	22.402	0	(2.449, 2.464]	2.4565	0
(22.472, 22.613]	22.5425	0	(2.464, 2.48]	2.472	1.56205e-05
(22.613, 22.753]	22.683	0	(2.48, 2.495]	2.4875	2.08274e-05
(22.753, 22.893]	22.823	0	(2.495, 2.51]	2.5025	0
(22.893, 23.034]	22.9635	0	(2.51, 2.526]	2.518	0
(23.034, 23.174]	23.104	0	(2.526, 2.541]	2.5335	1.56205e-05
(23.174, 23.315]	23.2445	0	(2.541, 2.557]	2.549	3.12411e-05
(23.315, 23.455]	23.385	0	(2.557, 2.572]	2.5645	0
(23.455, 23.596]	23.5255	0	(2.572, 2.587]	2.5795	5.20684e-06
(23.596, 23.736]	23.666	0	(2.587, 2.603]	2.595	0
(23.736, 23.877]	23.8065	0	(2.603, 2.618]	2.6105	0
(23.877, 24.017]	23.947	0	(2.618, 2.633]	2.6255	0
(24.017, 24.157]	24.087	0	(2.633, 2.649]	2.641	5.20684e-06
(24.157, 24.298]	24.2275	0	(2.649, 2.664]	2.6565	0
(24.298, 24.438]	24.368	0	(2.664, 2.68]	2.672	5.20684e-06
(24.438, 24.579]	24.5085	0	(2.68, 2.695]	2.6875	0
(24.579, 24.719]	24.649	0	(2.695, 2.71]	2.7025	5.20684e-06
(24.719, 24.86]	24.7895	0	(2.71, 2.726]	2.718	0
(24.86, 25.0]	24.93	0	(2.726, 2.741]	2.7335	0
(25.0, 25.141]	25.0705	0	(2.741, 2.756]	2.7485	0
(25.141, 25.281]	25.211	0	(2.756, 2.772]	2.764	0
(25.281, 25.422]	25.3515	0	(2.772, 2.787]	2.7795	0
(25.422, 25.562]	25.492	0	(2.787, 2.803]	2.795	0
(25.562, 25.702]	25.632	0	(2.803, 2.818]	2.8105	5.20684e-06
(25.702, 25.843]	25.7725	0	(2.818, 2.833]	2.8255	0
(25.843, 25.983]	25.913	0	(2.833, 2.849]	2.841	0
(25.983, 26.124]	26.0535	0	(2.849, 2.864]	2.8565	0
(26.124, 26.264]	26.194	0	(2.864, 2.879]	2.8715	0
(26.264, 26.405]	26.3345	4.15742e-06	(2.879, 2.895]	2.887	0
(26.405, 26.545]	26.475	0	(2.895, 2.91]	2.9025	0
(26.545, 26.686]	26.6155	0	(2.91, 2.926]	2.918	0
(26.686, 26.826]	26.756	0	(2.926, 2.941]	2.9335	0
(26.826, 26.966]	26.896	0	(2.941, 2.956]	2.9485	0
(26.966, 27.107]	27.0365	0	(2.956, 2.972]	2.964	0
(27.107, 27.247]	27.177	0	(2.972, 2.987]	2.9795	0
(27.247, 27.388]	27.3175	0	(2.987, 3.002]	2.9945	0
(27.388, 27.528]	27.458	0	(3.002, 3.018]	3.01	0
(27.528, 27.669]	27.5985	0	(3.018, 3.033]	3.0255	0
(27.669, 27.809]	27.739	0	(3.033, 3.049]	3.041	0
(27.809, 27.95]	27.8795	0	(3.049, 3.064]	3.0565	0
(27.95, 28.09]	28.02	4.15742e-06	(3.064, 3.079]	3.0715	5.20684e-06

## Sheet: Table S3
Table S3. Underlying data for Figure S3 in supporting information S1
pre_restriction_lbg_fuel_tno_intensity_1_interval	pre_restriction_lbg_fuel_tno_intensity_1_midpoint	pre_restriction_lbg_fuel_tno_intensity_1_proportion	pre_restriction_lbg_utility_tno_intensity_1_interval	pre_restriction_lbg_utility_tno_intensity_1_midpoint	pre_restriction_lbg_utility_tno_intensity_1_proportion	post_restriction_lbg_fuel_tno_intensity_2_interval	post_restriction_lbg_fuel_tno_intensity_2_midpoint	post_restriction_lbg_fuel_tno_intensity_2_proportion	post_restriction_lbg_utility_tno_intensity_2_interval	post_restriction_lbg_utility_tno_intensity_2_midpoint	post_restriction_lbg_utility_tno_intensity_2_proportion
(-0.766, 3.829]	1.5315	0.933035	(-9.508, 47.541]	19.0165	0.998506	(-0.0248, 0.124]	0.0496	0.43538	(-0.0158, 0.0789]	0.03155	0.377498
(3.829, 7.658]	5.7435	0.0457421	(47.541, 95.083]	71.312	0.00112468	(0.124, 0.248]	0.186	0.0892271	(0.0789, 0.158]	0.11845	0.0437641
(7.658, 11.488]	9.573	0.010221	(95.083, 142.624]	118.853	0.000171826	(0.248, 0.372]	0.31	0.0615784	(0.158, 0.237]	0.1975	0.0385299
(11.488, 15.317]	13.4025	0.00389992	(142.624, 190.166]	166.395	6.76889e-05	(0.372, 0.496]	0.434	0.0483463	(0.237, 0.316]	0.2765	0.034492
(15.317, 19.146]	17.2315	0.00191612	(190.166, 237.707]	213.936	4.68616e-05	(0.496, 0.62]	0.558	0.0392477	(0.316, 0.394]	0.355	0.0304961
(19.146, 22.975]	21.0605	0.00115071	(237.707, 285.249]	261.478	2.08274e-05	(0.62, 0.744]	0.682	0.0330504	(0.394, 0.473]	0.4335	0.0270923
(22.975, 26.805]	24.89	0.000744578	(285.249, 332.79]	309.019	0	(0.744, 0.867]	0.8055	0.0288211	(0.473, 0.552]	0.5125	0.0254593
(26.805, 30.634]	28.7195	0.000447788	(332.79, 380.332]	356.561	5.20684e-06	(0.867, 0.991]	0.929	0.0251243	(0.552, 0.631]	0.5915	0.022905
(30.634, 34.463]	32.5485	0.000322824	(380.332, 427.873]	404.102	5.20684e-06	(0.991, 1.115]	1.053	0.0221213	(0.631, 0.71]	0.6705	0.0206976
(34.463, 38.292]	36.3775	0.000249928	(427.873, 475.415]	451.644	2.08274e-05	(1.115, 1.239]	1.177	0.0203267	(0.71, 0.789]	0.7495	0.0193158
(38.292, 42.122]	40.207	0.000234308	(475.415, 522.956]	499.185	0	(1.239, 1.363]	1.301	0.0177485	(0.789, 0.868]	0.8285	0.0178023
(42.122, 45.951]	44.0365	0.000177033	(522.956, 570.498]	546.727	0	(1.363, 1.487]	1.425	0.0162889	(0.868, 0.947]	0.9075	0.0164624
(45.951, 49.78]	47.8655	0.000145792	(570.498, 618.039]	594.269	0	(1.487, 1.611]	1.549	0.0144883	(0.947, 1.025]	0.986	0.0154395
(49.78, 53.609]	51.6945	0.000156205	(618.039, 665.581]	641.81	0	(1.611, 1.735]	1.673	0.0138901	(1.025, 1.104]	1.0645	0.0145541
(53.609, 57.439]	55.524	7.81026e-05	(665.581, 713.122]	689.351	5.20684e-06	(1.735, 1.859]	1.797	0.0120118	(1.104, 1.183]	1.1435	0.0139918
(57.439, 61.268]	59.3535	0.000109344	(713.122, 760.664]	736.893	1.04137e-05	(1.859, 1.983]	1.921	0.0107975	(1.183, 1.262]	1.2225	0.0126878
(61.268, 65.097]	63.1825	0.000145792	(760.664, 808.205]	784.434	0	(1.983, 2.107]	2.045	0.00973865	(1.262, 1.341]	1.3015	0.0119998
(65.097, 68.926]	67.0115	0.000130171	(808.205, 855.747]	831.976	0	(2.107, 2.231]	2.169	0.00917036	(1.341, 1.42]	1.3805	0.0111982
(68.926, 72.756]	70.841	0.000150998	(855.747, 903.288]	879.517	0	(2.231, 2.355]	2.293	0.00844056	(1.42, 1.499]	1.4595	0.0101873
(72.756, 76.585]	74.6705	6.76889e-05	(903.288, 950.83]	927.059	0	(2.355, 2.478]	2.4165	0.00772871	(1.499, 1.578]	1.5385	0.0100796
(76.585, 80.414]	78.4995	0.000145792	(950.83, 998.371]	974.601	0	(2.478, 2.602]	2.54	0.00643062	(1.578, 1.657]	1.6175	0.00954722
(80.414, 84.243]	82.3285	0.000104137	(998.371, 1045.913]	1022.14	0	(2.602, 2.726]	2.664	0.00618536	(1.657, 1.735]	1.696	0.0089251
(84.243, 88.073]	86.158	0.000119757	(1045.913, 1093.454]	1069.68	0	(2.726, 2.85]	2.788	0.00565894	(1.735, 1.814]	1.7745	0.00867984
(88.073, 91.902]	89.9875	9.893e-05	(1093.454, 1140.996]	1117.22	0	(2.85, 2.974]	2.912	0.00542565	(1.814, 1.893]	1.8535	0.00820726
(91.902, 95.731]	93.8165	4.16547e-05	(1140.996, 1188.537]	1164.77	0	(2.974, 3.098]	3.036	0.00468388	(1.893, 1.972]	1.9325	0.00754925
(95.731, 99.56]	97.6455	3.64479e-05	(1188.537, 1236.079]	1212.31	0	(3.098, 3.222]	3.16	0.00457621	(1.972, 2.051]	2.0115	0.00732193
(99.56, 103.39]	101.475	5.72753e-05	(1236.079, 1283.62]	1259.85	0	(3.222, 3.346]	3.284	0.0040139	(2.051, 2.13]	2.0905	0.00679552
(103.39, 107.219]	105.304	3.12411e-05	(1283.62, 1331.162]	1307.39	0	(3.346, 3.47]	3.408	0.00372677	(2.13, 2.209]	2.1695	0.00661008
(107.219, 111.048]	109.133	1.56205e-05	(1331.162, 1378.703]	1354.93	0	(3.47, 3.594]	3.532	0.00353534	(2.209, 2.288]	2.2485	0.00632294
(111.048, 114.877]	112.963	5.20684e-06	(1378.703, 1426.245]	1402.47	0	(3.594, 3.718]	3.656	0.00323026	(2.288, 2.366]	2.327	0.00611956
(114.877, 118.707]	116.792	2.08274e-05	(1426.245, 1473.786]	1450.02	0	(3.718, 3.842]	3.78	0.00305679	(2.366, 2.445]	2.4055	0.00584439
(118.707, 122.536]	120.621	1.04137e-05	(1473.786, 1521.328]	1497.56	5.20684e-06	(3.842, 3.966]	3.904	0.00271581	(2.445, 2.524]	2.4845	0.00589224
(122.536, 126.365]	124.451	1.04137e-05	(1521.328, 1568.869]	1545.1	0	(3.966, 4.089]	4.0275	0.0023569	(2.524, 2.603]	2.5635	0.00486334
(126.365, 130.194]	128.279	1.04137e-05	(1568.869, 1616.411]	1592.64	0	(4.089, 4.213]	4.151	0.00221333	(2.603, 2.682]	2.6425	0.00525217
(130.194, 134.024]	132.109	1.04137e-05	(1616.411, 1663.952]	1640.18	0	(4.213, 4.337]	4.275	0.00202191	(2.682, 2.761]	2.7215	0.00485736
(134.024, 137.853]	135.939	0	(1663.952, 1711.494]	1687.72	0	(4.337, 4.461]	4.399	0.0020578	(2.761, 2.84]	2.8005	0.00497102
(137.853, 141.682]	139.767	1.04137e-05	(1711.494, 1759.035]	1735.26	0	(4.461, 4.585]	4.523	0.00177066	(2.84, 2.919]	2.8795	0.00451639
(141.682, 145.511]	143.596	0	(1759.035, 1806.577]	1782.81	0	(4.585, 4.709]	4.647	0.00141773	(2.919, 2.997]	2.958	0.00413952
(145.511, 149.34]	147.425	5.20684e-06	(1806.577, 1854.118]	1830.35	0	(4.709, 4.833]	4.771	0.00136389	(2.997, 3.076]	3.0365	0.00391819
(149.34, 153.17]	151.255	5.20684e-06	(1854.118, 1901.66]	1877.89	0	(4.833, 4.957]	4.895	0.00128612	(3.076, 3.155]	3.1155	0.0041156
(153.17, 156.999]	155.084	0	(1901.66, 1949.201]	1925.43	0	(4.957, 5.081]	5.019	0.00108274	(3.155, 3.234]	3.1945	0.00360115
(156.999, 160.828]	158.913	5.20684e-06	(1949.201, 1996.743]	1972.97	0	(5.081, 5.205]	5.143	0.000646053	(3.234, 3.313]	3.2735	0.00360115
(160.828, 164.657]	162.743	0	(1996.743, 2044.284]	2020.51	0	(5.205, 5.329]	5.267	0.000520431	(3.313, 3.392]	3.3525	0.00346356
(164.657, 168.487]	166.572	5.20684e-06	(2044.284, 2091.826]	2068.05	0	(5.329, 5.453]	5.391	0.000400792	(3.392, 3.471]	3.4315	0.00324821
(168.487, 172.316]	170.401	0	(2091.826, 2139.367]	2115.6	5.20684e-06	(5.453, 5.577]	5.515	0.000269189	(3.471, 3.55]	3.5105	0.0035174
(172.316, 176.145]	174.231	5.20684e-06	(2139.367, 2186.909]	2163.14	0	(5.577, 5.7]	5.6385	0.000215351	(3.55, 3.629]	3.5895	0.00316446
(176.145, 179.974]	178.06	0	(2186.909, 2234.45]	2210.68	0	(5.7, 5.824]	5.762	0.000269189	(3.629, 3.707]	3.668	0.00290126
(179.974, 183.804]	181.889	5.20684e-06	(2234.45, 2281.992]	2258.22	0	(5.824, 5.948]	5.886	0.000185441	(3.707, 3.786]	3.7465	0.00265001
(183.804, 187.633]	185.719	5.20684e-06	(2281.992, 2329.533]	2305.76	0	(5.948, 6.072]	6.01	0.000227315	(3.786, 3.865]	3.8255	0.00260814
(187.633, 191.462]	189.548	0	(2329.533, 2377.075]	2353.3	0	(6.072, 6.196]	6.134	0.000197405	(3.865, 3.944]	3.9045	0.00246457
(191.462, 195.291]	193.376	0	(2377.075, 2424.616]	2400.85	0	(6.196, 6.32]	6.258	0.000197405	(3.944, 4.023]	3.9835	0.00223127
(195.291, 199.121]	197.206	0	(2424.616, 2472.158]	2448.39	0	(6.32, 6.444]	6.382	0.000125621	(4.023, 4.102]	4.0625	0.00204583
(199.121, 202.95]	201.036	0	(2472.158, 2519.699]	2495.93	0	(6.444, 6.568]	6.506	0.000191423	(4.102, 4.181]	4.1415	0.00251841
(202.95, 206.779]	204.864	1.56205e-05	(2519.699, 2567.241]	2543.47	0	(6.568, 6.692]	6.63	0.000191423	(4.181, 4.26]	4.2205	0.001992
(206.779, 210.608]	208.694	5.20684e-06	(2567.241, 2614.782]	2591.01	0	(6.692, 6.816]	6.754	0.000131603	(4.26, 4.338]	4.299	0.00209369
(210.608, 214.438]	212.523	0	(2614.782, 2662.324]	2638.55	0	(6.816, 6.94]	6.878	0.000191423	(4.338, 4.417]	4.3775	0.00210565
(214.438, 218.267]	216.352	0	(2662.324, 2709.865]	2686.09	0	(6.94, 7.064]	7.002	0.000113657	(4.417, 4.496]	4.4565	0.00221931
(218.267, 222.096]	220.181	0	(2709.865, 2757.407]	2733.64	0	(7.064, 7.188]	7.126	8.97296e-05	(4.496, 4.575]	4.5355	0.00193816
(222.096, 225.925]	224.011	0	(2757.407, 2804.948]	2781.18	0	(7.188, 7.311]	7.2495	7.77656e-05	(4.575, 4.654]	4.6145	0.00174075
(225.925, 229.755]	227.84	5.20684e-06	(2804.948, 2852.49]	2828.72	0	(7.311, 7.435]	7.373	7.17836e-05	(4.654, 4.733]	4.6935	0.00174075
(229.755, 233.584]	231.669	0	(2852.49, 2900.031]	2876.26	0	(7.435, 7.559]	7.497	6.58017e-05	(4.733, 4.812]	4.7725	0.00166299
(233.584, 237.413]	235.499	0	(2900.031, 2947.573]	2923.8	0	(7.559, 7.683]	7.621	7.77656e-05	(4.812, 4.891]	4.8515	0.0016271
(237.413, 241.242]	239.327	0	(2947.573, 2995.114]	2971.34	0	(7.683, 7.807]	7.745	4.78558e-05	(4.891, 4.97]	4.9305	0.00154335
(241.242, 245.072]	243.157	5.20684e-06	(2995.114, 3042.655]	3018.88	0	(7.807, 7.931]	7.869	9.57115e-05	(4.97, 5.048]	5.009	0.00141773
(245.072, 248.901]	246.987	5.20684e-06	(3042.655, 3090.197]	3066.43	0	(7.931, 8.055]	7.993	4.18738e-05	(5.048, 5.127]	5.0875	0.00125023
(248.901, 252.73]	250.815	5.20684e-06	(3090.197, 3137.738]	3113.97	0	(8.055, 8.179]	8.117	4.18738e-05	(5.127, 5.206]	5.1665	0.00131603
(252.73, 256.559]	254.644	0	(3137.738, 3185.28]	3161.51	0	(8.179, 8.303]	8.241	4.18738e-05	(5.206, 5.285]	5.2455	0.00141175
(256.559, 260.389]	258.474	0	(3185.28, 3232.821]	3209.05	0	(8.303, 8.427]	8.365	3.58918e-05	(5.285, 5.364]	5.3245	0.00131603
(260.389, 264.218]	262.303	0	(3232.821, 3280.363]	3256.59	0	(8.427, 8.551]	8.489	3.58918e-05	(5.364, 5.443]	5.4035	0.00115452
(264.218, 268.047]	266.132	5.20684e-06	(3280.363, 3327.904]	3304.13	0	(8.551, 8.675]	8.613	4.78558e-05	(5.443, 5.522]	5.4825	0.00111265
(268.047, 271.876]	269.962	0	(3327.904, 3375.446]	3351.68	0	(8.675, 8.799]	8.737	7.77656e-05	(5.522, 5.601]	5.5615	0.00114854
(271.876, 275.706]	273.791	5.20684e-06	(3375.446, 3422.987]	3399.22	0	(8.799, 8.922]	8.8605	5.98197e-05	(5.601, 5.679]	5.64	0.00108872
(275.706, 279.535]	277.62	0	(3422.987, 3470.529]	3446.76	0	(8.922, 9.046]	8.984	4.78558e-05	(5.679, 5.758]	5.7185	0.000891314
(279.535, 283.364]	281.45	0	(3470.529, 3518.07]	3494.3	0	(9.046, 9.17]	9.108	5.98197e-05	(5.758, 5.837]	5.7975	0.000957115
(283.364, 287.193]	285.279	0	(3518.07, 3565.612]	3541.84	0	(9.17, 9.294]	9.232	4.18738e-05	(5.837, 5.916]	5.8765	0.000891314
(287.193, 291.022]	289.107	0	(3565.612, 3613.153]	3589.38	0	(9.294, 9.418]	9.356	4.18738e-05	(5.916, 5.995]	5.9555	0.000909259
(291.022, 294.852]	292.937	1.04137e-05	(3613.153, 3660.695]	3636.92	0	(9.418, 9.542]	9.48	5.38377e-05	(5.995, 6.074]	6.0345	0.000957115
(294.852, 298.681]	296.766	5.20684e-06	(3660.695, 3708.236]	3684.47	0	(9.542, 9.666]	9.604	8.97296e-05	(6.074, 6.153]	6.1135	0.000771674
(298.681, 302.51]	300.596	0	(3708.236, 3755.778]	3732.01	0	(9.666, 9.79]	9.728	6.58017e-05	(6.153, 6.232]	6.1925	0.000861404
(302.51, 306.339]	304.424	0	(3755.778, 3803.319]	3779.55	0	(9.79, 9.914]	9.852	1.19639e-05	(6.232, 6.311]	6.2715	0.000741764
(306.339, 310.169]	308.254	5.20684e-06	(3803.319, 3850.861]	3827.09	0	(9.914, 10.038]	9.976	2.99099e-05	(6.311, 6.389]	6.35	0.000699891
(310.169, 313.998]	312.083	0	(3850.861, 3898.402]	3874.63	0	(10.038, 10.162]	10.1	5.98197e-05	(6.389, 6.468]	6.4285	0.000693909
(313.998, 317.827]	315.913	0	(3898.402, 3945.944]	3922.17	0	(10.162, 10.286]	10.224	4.78558e-05	(6.468, 6.547]	6.5075	0.00075971
(317.827, 321.656]	319.741	0	(3945.944, 3993.485]	3969.71	0	(10.286, 10.41]	10.348	4.78558e-05	(6.547, 6.626]	6.5865	0.000735782
(321.656, 325.486]	323.571	0	(3993.485, 4041.027]	4017.26	0	(10.41, 10.533]	10.4715	2.99099e-05	(6.626, 6.705]	6.6655	0.000711854
(325.486, 329.315]	327.4	0	(4041.027, 4088.568]	4064.8	0	(10.533, 10.657]	10.595	4.18738e-05	(6.705, 6.784]	6.7445	0.000693909
(329.315, 333.144]	331.229	0	(4088.568, 4136.11]	4112.34	0	(10.657, 10.781]	10.719	4.18738e-05	(6.784, 6.863]	6.8235	0.000580251
(333.144, 336.973]	335.058	0	(4136.11, 4183.651]	4159.88	0	(10.781, 10.905]	10.843	7.17836e-05	(6.863, 6.942]	6.9025	0.000699891
(336.973, 340.803]	338.888	0	(4183.651, 4231.193]	4207.42	0	(10.905, 11.029]	10.967	5.38377e-05	(6.942, 7.02]	6.981	0.000616143
(340.803, 344.632]	342.717	0	(4231.193, 4278.734]	4254.96	0	(11.029, 11.153]	11.091	4.78558e-05	(7.02, 7.099]	7.0595	0.000610161
(344.632, 348.461]	346.546	0	(4278.734, 4326.276]	4302.51	0	(11.153, 11.277]	11.215	2.99099e-05	(7.099, 7.178]	7.1385	0.000490522
(348.461, 352.29]	350.375	0	(4326.276, 4373.817]	4350.05	0	(11.277, 11.401]	11.339	1.19639e-05	(7.178, 7.257]	7.2175	0.000532395
(352.29, 356.12]	354.205	0	(4373.817, 4421.359]	4397.59	0	(11.401, 11.525]	11.463	4.78558e-05	(7.257, 7.336]	7.2965	0.00045463
(356.12, 359.949]	358.034	0	(4421.359, 4468.9]	4445.13	0	(11.525, 11.649]	11.587	5.98197e-05	(7.336, 7.415]	7.3755	0.000538377
(359.949, 363.778]	361.863	5.20684e-06	(4468.9, 4516.442]	4492.67	0	(11.649, 11.773]	11.711	2.99099e-05	(7.415, 7.494]	7.4545	0.000532395
(363.778, 367.607]	365.692	0	(4516.442, 4563.983]	4540.21	0	(11.773, 11.897]	11.835	5.98197e-05	(7.494, 7.573]	7.5335	0.000550341
(367.607, 371.437]	369.522	0	(4563.983, 4611.525]	4587.75	0	(11.897, 12.021]	11.959	1.79459e-05	(7.573, 7.651]	7.612	0.000382846
(371.437, 375.266]	373.351	0	(4611.525, 4659.066]	4635.3	0	(12.021, 12.144]	12.0825	4.18738e-05	(7.651, 7.73]	7.6905	0.000520431
(375.266, 379.095]	377.18	0	(4659.066, 4706.608]	4682.84	0	(12.144, 12.268]	12.206	3.58918e-05	(7.73, 7.809]	7.7695	0.000490522
(379.095, 382.924]	381.01	0	(4706.608, 4754.149]	4730.38	0	(12.268, 12.392]	12.33	1.79459e-05	(7.809, 7.888]	7.8485	0.000508467
(382.924, 386.754]	384.839	5.20684e-06	(4754.149, 4801.691]	4777.92	0	(12.392, 12.516]	12.454	1.79459e-05	(7.888, 7.967]	7.9275	0.000382846
(386.754, 390.583]	388.668	0	(4801.691, 4849.232]	4825.46	0	(12.516, 12.64]	12.578	1.79459e-05	(7.967, 8.046]	8.0065	0.000370882
(390.583, 394.412]	392.498	0	(4849.232, 4896.774]	4873	0	(12.64, 12.764]	12.702	2.39279e-05	(8.046, 8.125]	8.0855	0.000448648
(394.412, 398.241]	396.327	0	(4896.774, 4944.315]	4920.54	0	(12.764, 12.888]	12.826	4.18738e-05	(8.125, 8.204]	8.1645	0.000370882
(398.241, 402.071]	400.156	0	(4944.315, 4991.857]	4968.09	0	(12.888, 13.012]	12.95	3.58918e-05	(8.204, 8.283]	8.2435	0.000370882
(402.071, 405.9]	403.986	0	(4991.857, 5039.398]	5015.63	0	(13.012, 13.136]	13.074	1.79459e-05	(8.283, 8.361]	8.322	0.0003649
(405.9, 409.729]	407.814	0	(5039.398, 5086.94]	5063.17	0	(13.136, 13.26]	13.198	2.39279e-05	(8.361, 8.44]	8.4005	0.000346954
(409.729, 413.558]	411.644	0	(5086.94, 5134.481]	5110.71	0	(13.26, 13.384]	13.322	2.39279e-05	(8.44, 8.519]	8.4795	0.000358918
(413.558, 417.388]	415.473	0	(5134.481, 5182.023]	5158.25	0	(13.384, 13.508]	13.446	2.39279e-05	(8.519, 8.598]	8.5585	0.000323026
(417.388, 421.217]	419.303	0	(5182.023, 5229.564]	5205.79	0	(13.508, 13.632]	13.57	1.79459e-05	(8.598, 8.677]	8.6375	0.000221333
(421.217, 425.046]	423.131	0	(5229.564, 5277.106]	5253.34	0	(13.632, 13.755]	13.6935	2.39279e-05	(8.677, 8.756]	8.7165	0.00030508
(425.046, 428.875]	426.961	0	(5277.106, 5324.647]	5300.88	0	(13.755, 13.879]	13.817	1.19639e-05	(8.756, 8.835]	8.7955	0.000323026
(428.875, 432.704]	430.789	0	(5324.647, 5372.189]	5348.42	0	(13.879, 14.003]	13.941	2.99099e-05	(8.835, 8.914]	8.8745	0.000269189
(432.704, 436.534]	434.619	0	(5372.189, 5419.73]	5395.96	0	(14.003, 14.127]	14.065	5.98197e-06	(8.914, 8.992]	8.953	0.000215351
(436.534, 440.363]	438.448	0	(5419.73, 5467.272]	5443.5	0	(14.127, 14.251]	14.189	2.39279e-05	(8.992, 9.071]	9.0315	0.000287135
(440.363, 444.192]	442.277	0	(5467.272, 5514.813]	5491.04	0	(14.251, 14.375]	14.313	5.98197e-06	(9.071, 9.15]	9.1105	0.000251243
(444.192, 448.021]	446.106	0	(5514.813, 5562.355]	5538.58	0	(14.375, 14.499]	14.437	0	(9.15, 9.229]	9.1895	0.000215351
(448.021, 451.851]	449.936	0	(5562.355, 5609.896]	5586.13	0	(14.499, 14.623]	14.561	1.79459e-05	(9.229, 9.308]	9.2685	0.000233297
(451.851, 455.68]	453.765	0	(5609.896, 5657.438]	5633.67	0	(14.623, 14.747]	14.685	3.58918e-05	(9.308, 9.387]	9.3475	0.000311062
(455.68, 459.509]	457.594	0	(5657.438, 5704.979]	5681.21	0	(14.747, 14.871]	14.809	1.19639e-05	(9.387, 9.466]	9.4265	0.000215351
(459.509, 463.338]	461.423	0	(5704.979, 5752.521]	5728.75	0	(14.871, 14.995]	14.933	2.39279e-05	(9.466, 9.545]	9.5055	0.000221333
(463.338, 467.168]	465.253	0	(5752.521, 5800.062]	5776.29	0	(14.995, 15.119]	15.057	2.99099e-05	(9.545, 9.624]	9.5845	0.000251243
(467.168, 470.997]	469.082	0	(5800.062, 5847.604]	5823.83	0	(15.119, 15.243]	15.181	5.98197e-06	(9.624, 9.702]	9.663	0.000197405
(470.997, 474.826]	472.911	0	(5847.604, 5895.145]	5871.37	0	(15.243, 15.366]	15.3045	1.79459e-05	(9.702, 9.781]	9.7415	0.000227315
(474.826, 478.655]	476.74	0	(5895.145, 5942.687]	5918.92	0	(15.366, 15.49]	15.428	2.99099e-05	(9.781, 9.86]	9.8205	0.000143567
(478.655, 482.485]	480.57	0	(5942.687, 5990.228]	5966.46	0	(15.49, 15.614]	15.552	1.79459e-05	(9.86, 9.939]	9.8995	0.000257225
(482.485, 486.314]	484.399	0	(5990.228, 6037.769]	6014	0	(15.614, 15.738]	15.676	2.99099e-05	(9.939, 10.018]	9.9785	0.000179459
(486.314, 490.143]	488.228	0	(6037.769, 6085.311]	6061.54	0	(15.738, 15.862]	15.8	0	(10.018, 10.097]	10.0575	0.000203387
(490.143, 493.972]	492.058	0	(6085.311, 6132.852]	6109.08	0	(15.862, 15.986]	15.924	1.79459e-05	(10.097, 10.176]	10.1365	0.000149549
(493.972, 497.802]	495.887	0	(6132.852, 6180.394]	6156.62	0	(15.986, 16.11]	16.048	1.19639e-05	(10.176, 10.255]	10.2155	0.000191423
(497.802, 501.631]	499.716	5.20684e-06	(6180.394, 6227.935]	6204.16	0	(16.11, 16.234]	16.172	2.39279e-05	(10.255, 10.333]	10.294	0.000173477
(501.631, 505.46]	503.545	0	(6227.935, 6275.477]	6251.71	0	(16.234, 16.358]	16.296	3.58918e-05	(10.333, 10.412]	10.3725	0.000209369
(505.46, 509.289]	507.375	0	(6275.477, 6323.018]	6299.25	0	(16.358, 16.482]	16.42	1.19639e-05	(10.412, 10.491]	10.4515	0.000143567
(509.289, 513.119]	511.204	0	(6323.018, 6370.56]	6346.79	0	(16.482, 16.606]	16.544	1.19639e-05	(10.491, 10.57]	10.5305	0.000143567
(513.119, 516.948]	515.034	0	(6370.56, 6418.101]	6394.33	0	(16.606, 16.73]	16.668	2.39279e-05	(10.57, 10.649]	10.6095	0.000179459
(516.948, 520.777]	518.862	0	(6418.101, 6465.643]	6441.87	0	(16.73, 16.853]	16.7915	1.19639e-05	(10.649, 10.728]	10.6885	0.000113657
(520.777, 524.606]	522.692	0	(6465.643, 6513.184]	6489.41	0	(16.853, 16.977]	16.915	0	(10.728, 10.807]	10.7675	0.000125621
(524.606, 528.436]	526.521	0	(6513.184, 6560.726]	6536.95	0	(16.977, 17.101]	17.039	1.79459e-05	(10.807, 10.886]	10.8465	0.000137585
(528.436, 532.265]	530.351	0	(6560.726, 6608.267]	6584.5	0	(17.101, 17.225]	17.163	2.39279e-05	(10.886, 10.965]	10.9255	0.000125621
(532.265, 536.094]	534.179	0	(6608.267, 6655.809]	6632.04	0	(17.225, 17.349]	17.287	1.79459e-05	(10.965, 11.043]	11.004	0.000143567
(536.094, 539.923]	538.009	0	(6655.809, 6703.35]	6679.58	0	(17.349, 17.473]	17.411	2.99099e-05	(11.043, 11.122]	11.0825	8.37476e-05
(539.923, 543.753]	541.838	5.20684e-06	(6703.35, 6750.892]	6727.12	0	(17.473, 17.597]	17.535	1.79459e-05	(11.122, 11.201]	11.1615	0.000167495
(543.753, 547.582]	545.668	0	(6750.892, 6798.433]	6774.66	0	(17.597, 17.721]	17.659	2.39279e-05	(11.201, 11.28]	11.2405	0.000137585
(547.582, 551.411]	549.496	0	(6798.433, 6845.975]	6822.2	0	(17.721, 17.845]	17.783	2.39279e-05	(11.28, 11.359]	11.3195	0.000113657
(551.411, 555.24]	553.325	0	(6845.975, 6893.516]	6869.75	0	(17.845, 17.969]	17.907	5.98197e-06	(11.359, 11.438]	11.3985	5.38377e-05
(555.24, 559.07]	557.155	0	(6893.516, 6941.058]	6917.29	0	(17.969, 18.093]	18.031	3.58918e-05	(11.438, 11.517]	11.4775	0.000185441
(559.07, 562.899]	560.985	0	(6941.058, 6988.599]	6964.83	0	(18.093, 18.217]	18.155	2.99099e-05	(11.517, 11.596]	11.5565	0.000149549
(562.899, 566.728]	564.813	0	(6988.599, 7036.141]	7012.37	0	(18.217, 18.341]	18.279	5.98197e-06	(11.596, 11.674]	11.635	7.77656e-05
(566.728, 570.557]	568.642	5.20684e-06	(7036.141, 7083.682]	7059.91	0	(18.341, 18.464]	18.4025	0	(11.674, 11.753]	11.7135	0.000107675
(570.557, 574.386]	572.471	0	(7083.682, 7131.224]	7107.45	0	(18.464, 18.588]	18.526	1.19639e-05	(11.753, 11.832]	11.7925	0.000119639
(574.386, 578.216]	576.301	0	(7131.224, 7178.765]	7154.99	0	(18.588, 18.712]	18.65	1.19639e-05	(11.832, 11.911]	11.8715	9.57115e-05
(578.216, 582.045]	580.13	0	(7178.765, 7226.307]	7202.54	0	(18.712, 18.836]	18.774	5.98197e-06	(11.911, 11.99]	11.9505	8.97296e-05
(582.045, 585.874]	583.959	0	(7226.307, 7273.848]	7250.08	0	(18.836, 18.96]	18.898	0	(11.99, 12.069]	12.0295	0.000131603
(585.874, 589.703]	587.788	0	(7273.848, 7321.39]	7297.62	0	(18.96, 19.084]	19.022	1.19639e-05	(12.069, 12.148]	12.1085	7.77656e-05
(589.703, 593.533]	591.618	0	(7321.39, 7368.931]	7345.16	0	(19.084, 19.208]	19.146	1.79459e-05	(12.148, 12.227]	12.1875	0.000125621
(593.533, 597.362]	595.447	0	(7368.931, 7416.473]	7392.7	0	(19.208, 19.332]	19.27	2.39279e-05	(12.227, 12.305]	12.266	0.000119639
(597.362, 601.191]	599.276	0	(7416.473, 7464.014]	7440.24	0	(19.332, 19.456]	19.394	2.39279e-05	(12.305, 12.384]	12.3445	0.000113657
(601.191, 605.02]	603.106	0	(7464.014, 7511.556]	7487.78	0	(19.456, 19.58]	19.518	2.39279e-05	(12.384, 12.463]	12.4235	0.000101693
(605.02, 608.85]	606.935	0	(7511.556, 7559.097]	7535.33	0	(19.58, 19.704]	19.642	1.19639e-05	(12.463, 12.542]	12.5025	0.000113657
(608.85, 612.679]	610.764	0	(7559.097, 7606.639]	7582.87	0	(19.704, 19.828]	19.766	1.79459e-05	(12.542, 12.621]	12.5815	0.000131603
(612.679, 616.508]	614.593	0	(7606.639, 7654.18]	7630.41	0	(19.828, 19.952]	19.89	0	(12.621, 12.7]	12.6605	0.000113657
(616.508, 620.337]	618.423	0	(7654.18, 7701.722]	7677.95	0	(19.952, 20.075]	20.0135	0	(12.7, 12.779]	12.7395	5.98197e-05
(620.337, 624.167]	622.252	0	(7701.722, 7749.263]	7725.49	0	(20.075, 20.199]	20.137	1.19639e-05	(12.779, 12.858]	12.8185	0.000119639
(624.167, 627.996]	626.082	0	(7749.263, 7796.805]	7773.03	0	(20.199, 20.323]	20.261	5.98197e-06	(12.858, 12.937]	12.8975	4.78558e-05
(627.996, 631.825]	629.91	0	(7796.805, 7844.346]	7820.58	0	(20.323, 20.447]	20.385	1.19639e-05	(12.937, 13.015]	12.976	8.37476e-05
(631.825, 635.654]	633.74	0	(7844.346, 7891.888]	7868.12	0	(20.447, 20.571]	20.509	1.19639e-05	(13.015, 13.094]	13.0545	3.58918e-05
(635.654, 639.484]	637.569	0	(7891.888, 7939.429]	7915.66	0	(20.571, 20.695]	20.633	1.19639e-05	(13.094, 13.173]	13.1335	6.58017e-05
(639.484, 643.313]	641.399	0	(7939.429, 7986.971]	7963.2	0	(20.695, 20.819]	20.757	5.98197e-06	(13.173, 13.252]	13.2125	9.57115e-05
(643.313, 647.142]	645.227	0	(7986.971, 8034.512]	8010.74	0	(20.819, 20.943]	20.881	5.98197e-06	(13.252, 13.331]	13.2915	5.98197e-05
(647.142, 650.971]	649.057	0	(8034.512, 8082.054]	8058.28	0	(20.943, 21.067]	21.005	5.98197e-06	(13.331, 13.41]	13.3705	7.17836e-05
(650.971, 654.801]	652.886	0	(8082.054, 8129.595]	8105.82	0	(21.067, 21.191]	21.129	5.98197e-06	(13.41, 13.489]	13.4495	3.58918e-05
(654.801, 658.63]	656.716	0	(8129.595, 8177.137]	8153.37	0	(21.191, 21.315]	21.253	5.98197e-06	(13.489, 13.568]	13.5285	7.17836e-05
(658.63, 662.459]	660.544	0	(8177.137, 8224.678]	8200.91	0	(21.315, 21.439]	21.377	0	(13.568, 13.646]	13.607	5.98197e-05
(662.459, 666.288]	664.373	0	(8224.678, 8272.22]	8248.45	0	(21.439, 21.563]	21.501	5.98197e-06	(13.646, 13.725]	13.6855	8.37476e-05
(666.288, 670.118]	668.203	0	(8272.22, 8319.761]	8295.99	0	(21.563, 21.686]	21.6245	2.39279e-05	(13.725, 13.804]	13.7645	4.18738e-05
(670.118, 673.947]	672.033	0	(8319.761, 8367.303]	8343.53	0	(21.686, 21.81]	21.748	1.19639e-05	(13.804, 13.883]	13.8435	4.78558e-05
(673.947, 677.776]	675.861	0	(8367.303, 8414.844]	8391.07	0	(21.81, 21.934]	21.872	5.98197e-06	(13.883, 13.962]	13.9225	5.98197e-05
(677.776, 681.605]	679.69	5.20684e-06	(8414.844, 8462.386]	8438.61	0	(21.934, 22.058]	21.996	1.19639e-05	(13.962, 14.041]	14.0015	9.57115e-05
(681.605, 685.435]	683.52	0	(8462.386, 8509.927]	8486.16	0	(22.058, 22.182]	22.12	5.98197e-06	(14.041, 14.12]	14.0805	5.38377e-05
(685.435, 689.264]	687.35	0	(8509.927, 8557.469]	8533.7	0	(22.182, 22.306]	22.244	0	(14.12, 14.199]	14.1595	2.99099e-05
(689.264, 693.093]	691.178	0	(8557.469, 8605.01]	8581.24	0	(22.306, 22.43]	22.368	1.79459e-05	(14.199, 14.278]	14.2385	7.17836e-05
(693.093, 696.922]	695.007	0	(8605.01, 8652.552]	8628.78	0	(22.43, 22.554]	22.492	1.79459e-05	(14.278, 14.356]	14.317	7.77656e-05
(696.922, 700.752]	698.837	0	(8652.552, 8700.093]	8676.32	0	(22.554, 22.678]	22.616	1.79459e-05	(14.356, 14.435]	14.3955	8.37476e-05
(700.752, 704.581]	702.667	0	(8700.093, 8747.635]	8723.86	0	(22.678, 22.802]	22.74	5.98197e-06	(14.435, 14.514]	14.4745	4.18738e-05
(704.581, 708.41]	706.495	0	(8747.635, 8795.176]	8771.41	0	(22.802, 22.926]	22.864	1.79459e-05	(14.514, 14.593]	14.5535	3.58918e-05
(708.41, 712.239]	710.324	0	(8795.176, 8842.718]	8818.95	0	(22.926, 23.05]	22.988	0	(14.593, 14.672]	14.6325	5.98197e-05
(712.239, 716.068]	714.154	0	(8842.718, 8890.259]	8866.49	0	(23.05, 23.174]	23.112	1.79459e-05	(14.672, 14.751]	14.7115	4.78558e-05
(716.068, 719.898]	717.983	0	(8890.259, 8937.8]	8914.03	0	(23.174, 23.297]	23.2355	5.98197e-06	(14.751, 14.83]	14.7905	2.99099e-05
(719.898, 723.727]	721.812	0	(8937.8, 8985.342]	8961.57	0	(23.297, 23.421]	23.359	1.79459e-05	(14.83, 14.909]	14.8695	3.58918e-05
(723.727, 727.556]	725.641	0	(8985.342, 9032.883]	9009.11	0	(23.421, 23.545]	23.483	0	(14.909, 14.987]	14.948	5.38377e-05
(727.556, 731.385]	729.471	0	(9032.883, 9080.425]	9056.65	0	(23.545, 23.669]	23.607	5.98197e-06	(14.987, 15.066]	15.0265	3.58918e-05
(731.385, 735.215]	733.3	0	(9080.425, 9127.966]	9104.2	0	(23.669, 23.793]	23.731	1.19639e-05	(15.066, 15.145]	15.1055	3.58918e-05
(735.215, 739.044]	737.13	0	(9127.966, 9175.508]	9151.74	0	(23.793, 23.917]	23.855	5.98197e-06	(15.145, 15.224]	15.1845	5.98197e-05
(739.044, 742.873]	740.958	0	(9175.508, 9223.049]	9199.28	0	(23.917, 24.041]	23.979	0	(15.224, 15.303]	15.2635	4.18738e-05
(742.873, 746.702]	744.788	0	(9223.049, 9270.591]	9246.82	0	(24.041, 24.165]	24.103	5.98197e-06	(15.303, 15.382]	15.3425	3.58918e-05
(746.702, 750.532]	748.617	0	(9270.591, 9318.132]	9294.36	0	(24.165, 24.289]	24.227	5.98197e-06	(15.382, 15.461]	15.4215	2.39279e-05
(750.532, 754.361]	752.447	0	(9318.132, 9365.674]	9341.9	0	(24.289, 24.413]	24.351	0	(15.461, 15.54]	15.5005	2.39279e-05
(754.361, 758.19]	756.275	0	(9365.674, 9413.215]	9389.44	0	(24.413, 24.537]	24.475	1.19639e-05	(15.54, 15.619]	15.5795	3.58918e-05
(758.19, 762.019]	760.105	0	(9413.215, 9460.757]	9436.99	0	(24.537, 24.661]	24.599	0	(15.619, 15.697]	15.658	2.39279e-05
(762.019, 765.849]	763.934	5.20684e-06	(9460.757, 9508.298]	9484.53	5.20684e-06	(24.661, 24.785]	24.723	1.19639e-05	(15.697, 15.776]	15.7365	2.99099e-05

## Sheet: Table S4
Table S4. Underlying data for Figure S4 in supporting information S1
pre_restriction_lbg_margin_interval	pre_restriction_lbg_margin_midpoint	pre_restriction_lbg_margin_proportion	post_restriction_lbg_margin_interval	post_restriction_lbg_margin_midpoint	post_restriction_lbg_margin_proportion
(-34.642, 177.192]	71.275	0.945984	(0.464, 1.66]	1.062	1.19639e-05
(177.192, 353.721]	265.457	0.0380776	(1.66, 2.657]	2.1585	2.39279e-05
(353.721, 530.25]	441.986	0.0070032	(2.657, 3.653]	3.155	1.79459e-05
(530.25, 706.778]	618.514	0.00295228	(3.653, 4.65]	4.1515	4.18738e-05
(706.778, 883.307]	795.043	0.00151519	(4.65, 5.647]	5.1485	5.98197e-05
(883.307, 1059.836]	971.572	0.00104137	(5.647, 6.643]	6.145	1.19639e-05
(1059.836, 1236.365]	1148.1	0.000671683	(6.643, 7.64]	7.1415	2.99099e-05
(1236.365, 1412.893]	1324.63	0.000452995	(7.64, 8.637]	8.1385	4.18738e-05
(1412.893, 1589.422]	1501.16	0.000338445	(8.637, 9.633]	9.135	4.78558e-05
(1589.422, 1765.951]	1677.69	0.000229101	(9.633, 10.63]	10.1315	4.78558e-05
(1765.951, 1942.479]	1854.21	0.000161412	(10.63, 11.627]	11.1285	8.97296e-05
(1942.479, 2119.008]	2030.74	0.000156205	(11.627, 12.623]	12.125	4.18738e-05
(2119.008, 2295.537]	2207.27	0.000156205	(12.623, 13.62]	13.1215	5.98197e-05
(2295.537, 2472.066]	2383.8	0.000119757	(13.62, 14.617]	14.1185	0.000131603
(2472.066, 2648.594]	2560.33	7.28958e-05	(14.617, 15.613]	15.115	0.000209369
(2648.594, 2825.123]	2736.86	8.33095e-05	(15.613, 16.61]	16.1115	0.000191423
(2825.123, 3001.652]	2913.39	0.000119757	(16.61, 17.607]	17.1085	0.000263207
(3001.652, 3178.18]	3089.92	6.76889e-05	(17.607, 18.603]	18.105	0.000287135
(3178.18, 3354.709]	3266.44	6.24821e-05	(18.603, 19.6]	19.1015	0.000430702
(3354.709, 3531.238]	3442.97	3.64479e-05	(19.6, 20.597]	20.0985	0.00045463
(3531.238, 3707.767]	3619.5	5.20684e-05	(20.597, 21.593]	21.095	0.000514449
(3707.767, 3884.295]	3796.03	5.20684e-05	(21.593, 22.59]	22.0915	0.000616143
(3884.295, 4060.824]	3972.56	4.16547e-05	(22.59, 23.587]	23.0885	0.000658017
(4060.824, 4237.353]	4149.09	4.68616e-05	(23.587, 24.583]	24.085	0.000723818
(4237.353, 4413.881]	4325.62	4.68616e-05	(24.583, 25.58]	25.0815	0.000843458
(4413.881, 4590.41]	4502.15	3.12411e-05	(25.58, 26.577]	26.0785	0.000723818
(4590.41, 4766.939]	4678.67	1.56205e-05	(26.577, 27.573]	27.075	0.000855422
(4766.939, 4943.468]	4855.2	3.12411e-05	(27.573, 28.57]	28.0715	0.000777656
(4943.468, 5119.996]	5031.73	3.64479e-05	(28.57, 29.567]	29.0685	0.000687927
(5119.996, 5296.525]	5208.26	2.60342e-05	(29.567, 30.563]	30.065	0.0007298
(5296.525, 5473.054]	5384.79	1.56205e-05	(30.563, 31.56]	31.0615	0.000568287
(5473.054, 5649.582]	5561.32	2.60342e-05	(31.56, 32.557]	32.0585	0.000681945
(5649.582, 5826.111]	5737.85	1.04137e-05	(32.557, 33.553]	33.055	0.000604179
(5826.111, 6002.64]	5914.38	2.08274e-05	(33.553, 34.55]	34.0515	0.000687927
(6002.64, 6179.169]	6090.9	1.04137e-05	(34.55, 35.547]	35.0485	0.000568287
(6179.169, 6355.697]	6267.43	0	(35.547, 36.543]	36.045	0.000622125
(6355.697, 6532.226]	6443.96	1.56205e-05	(36.543, 37.54]	37.0415	0.000699891
(6532.226, 6708.755]	6620.49	1.04137e-05	(37.54, 38.537]	38.0385	0.000687927
(6708.755, 6885.283]	6797.02	5.20684e-06	(38.537, 39.533]	39.035	0.00078962
(6885.283, 7061.812]	6973.55	0	(39.533, 40.53]	40.0315	0.000652035
(7061.812, 7238.341]	7150.08	2.08274e-05	(40.53, 41.527]	41.0285	0.000777656
(7238.341, 7414.87]	7326.61	0	(41.527, 42.523]	42.025	0.00078962
(7414.87, 7591.398]	7503.13	1.04137e-05	(42.523, 43.52]	43.0215	0.000837476
(7591.398, 7767.927]	7679.66	0	(43.52, 44.516]	44.018	0.000801584
(7767.927, 7944.456]	7856.19	1.04137e-05	(44.516, 45.513]	45.0145	0.000867386
(7944.456, 8120.985]	8032.72	5.20684e-06	(45.513, 46.51]	46.0115	0.000873368
(8120.985, 8297.513]	8209.25	1.04137e-05	(46.51, 47.506]	47.008	0.00087935
(8297.513, 8474.042]	8385.78	5.20684e-06	(47.506, 48.503]	48.0045	0.000945151
(8474.042, 8650.571]	8562.31	5.20684e-06	(48.503, 49.5]	49.0015	0.00110068
(8650.571, 8827.099]	8738.83	5.20684e-06	(49.5, 50.496]	49.998	0.00105283
(8827.099, 9003.628]	8915.36	5.20684e-06	(50.496, 51.493]	50.9945	0.00124425
(9003.628, 9180.157]	9091.89	0	(51.493, 52.49]	51.9915	0.0012622
(9180.157, 9356.686]	9268.42	0	(52.49, 53.486]	52.988	0.0012622
(9356.686, 9533.214]	9444.95	1.04137e-05	(53.486, 54.483]	53.9845	0.00125621
(9533.214, 9709.743]	9621.48	1.04137e-05	(54.483, 55.48]	54.9815	0.00147156
(9709.743, 9886.272]	9798.01	0	(55.48, 56.476]	55.978	0.00144165
(9886.272, 10062.8]	9974.54	5.20684e-06	(56.476, 57.473]	56.9745	0.00147156
(10062.8, 10239.329]	10151.1	0	(57.473, 58.47]	57.9715	0.00162111
(10239.329, 10415.858]	10327.6	5.20684e-06	(58.47, 59.466]	58.968	0.00176468
(10415.858, 10592.387]	10504.1	0	(59.466, 60.463]	59.9645	0.00158522
(10592.387, 10768.915]	10680.7	0	(60.463, 61.46]	60.9615	0.00165701
(10768.915, 10945.444]	10857.2	0	(61.46, 62.456]	61.958	0.00190227
(10945.444, 11121.973]	11033.7	0	(62.456, 63.453]	62.9545	0.00208771
(11121.973, 11298.501]	11210.2	1.04137e-05	(63.453, 64.45]	63.9515	0.00209369
(11298.501, 11475.03]	11386.8	0	(64.45, 65.446]	64.948	0.00218342
(11475.03, 11651.559]	11563.3	0	(65.446, 66.443]	65.9445	0.00227315
(11651.559, 11828.088]	11739.8	0	(66.443, 67.44]	66.9415	0.00232699
(11828.088, 12004.616]	11916.4	0	(67.44, 68.436]	67.938	0.00242868
(12004.616, 12181.145]	12092.9	0	(68.436, 69.433]	68.9345	0.00263207
(12181.145, 12357.674]	12269.4	0	(69.433, 70.43]	69.9315	0.00263805
(12357.674, 12534.202]	12445.9	0	(70.43, 71.426]	70.928	0.00321232
(12534.202, 12710.731]	12622.5	0	(71.426, 72.423]	71.9245	0.00326616
(12710.731, 12887.26]	12799	0	(72.423, 73.42]	72.9215	0.00331999
(12887.26, 13063.789]	12975.5	0	(73.42, 74.416]	73.918	0.00360713
(13063.789, 13240.317]	13152.1	5.20684e-06	(74.416, 75.413]	74.9145	0.0033858
(13240.317, 13416.846]	13328.6	5.20684e-06	(75.413, 76.41]	75.9115	0.00388828
(13416.846, 13593.375]	13505.1	0	(76.41, 77.406]	76.908	0.00398997
(13593.375, 13769.903]	13681.6	5.20684e-06	(77.406, 78.403]	77.9045	0.00458219
(13769.903, 13946.432]	13858.2	0	(78.403, 79.4]	78.9015	0.00489923
(13946.432, 14122.961]	14034.7	0	(79.4, 80.396]	79.898	0.00506075
(14122.961, 14299.49]	14211.2	0	(80.396, 81.393]	80.8945	0.00552136
(14299.49, 14476.018]	14387.8	0	(81.393, 82.39]	81.8915	0.00548547
(14476.018, 14652.547]	14564.3	5.20684e-06	(82.39, 83.386]	82.888	0.00646651
(14652.547, 14829.076]	14740.8	5.20684e-06	(83.386, 84.383]	83.8845	0.00722622
(14829.076, 15005.604]	14917.3	5.20684e-06	(84.383, 85.38]	84.8815	0.00774067
(15005.604, 15182.133]	15093.9	0	(85.38, 86.376]	85.878	0.00807566
(15182.133, 15358.662]	15270.4	0	(86.376, 87.373]	86.8745	0.00870377
(15358.662, 15535.191]	15446.9	5.20684e-06	(87.373, 88.369]	87.871	0.00928402
(15535.191, 15711.719]	15623.5	0	(88.369, 89.366]	88.8675	0.0106898
(15711.719, 15888.248]	15800	0	(89.366, 90.363]	89.8645	0.011958
(15888.248, 16064.777]	15976.5	5.20684e-06	(90.363, 91.359]	90.861	0.0123408
(16064.777, 16241.306]	16153	0	(91.359, 92.356]	91.8575	0.014279
(16241.306, 16417.834]	16329.6	0	(92.356, 93.353]	92.8545	0.0153497
(16417.834, 16594.363]	16506.1	0	(93.353, 94.349]	93.851	0.0174195
(16594.363, 16770.892]	16682.6	5.20684e-06	(94.349, 95.346]	94.8475	0.0195192
(16770.892, 16947.42]	16859.2	0	(95.346, 96.343]	95.8445	0.0223187
(16947.42, 17123.949]	17035.7	5.20684e-06	(96.343, 97.339]	96.841	0.0256567
(17123.949, 17300.478]	17212.2	0	(97.339, 98.336]	97.8375	0.0304722
(17300.478, 17477.007]	17388.7	5.20684e-06	(98.336, 99.333]	98.8345	0.0357243
(17477.007, 17653.535]	17565.3	0	(99.333, 100.329]	99.831	0.0406595
(17653.535, 17830.064]	17741.8	0	(100.329, 101.326]	100.827	0.0381171
(17830.064, 18006.593]	17918.3	0	(101.326, 102.323]	101.825	0.0356765
(18006.593, 18183.121]	18094.9	5.20684e-06	(102.323, 103.319]	102.821	0.0331222
(18183.121, 18359.65]	18271.4	5.20684e-06	(103.319, 104.316]	103.817	0.031178
(18359.65, 18536.179]	18447.9	0	(104.316, 105.313]	104.814	0.0284443
(18536.179, 18712.708]	18624.4	0	(105.313, 106.309]	105.811	0.025878
(18712.708, 18889.236]	18801	5.20684e-06	(106.309, 107.306]	106.808	0.0248431
(18889.236, 19065.765]	18977.5	0	(107.306, 108.303]	107.804	0.023892
(19065.765, 19242.294]	19154	0	(108.303, 109.299]	108.801	0.0221453
(19242.294, 19418.822]	19330.6	0	(109.299, 110.296]	109.797	0.0201353
(19418.822, 19595.351]	19507.1	0	(110.296, 111.293]	110.794	0.0180775
(19595.351, 19771.88]	19683.6	0	(111.293, 112.289]	111.791	0.0167017
(19771.88, 19948.409]	19860.1	0	(112.289, 113.286]	112.787	0.0155591
(19948.409, 20124.937]	20036.7	0	(113.286, 114.283]	113.784	0.0145781
(20124.937, 20301.466]	20213.2	0	(114.283, 115.279]	114.781	0.0135791
(20301.466, 20477.995]	20389.7	0	(115.279, 116.276]	115.778	0.0131304
(20477.995, 20654.523]	20566.3	0	(116.276, 117.273]	116.774	0.0117187
(20654.523, 20831.052]	20742.8	0	(117.273, 118.269]	117.771	0.0109829
(20831.052, 21007.581]	20919.3	0	(118.269, 119.266]	118.767	0.0105043
(21007.581, 21184.11]	21095.8	0	(119.266, 120.263]	119.764	0.0098224
(21184.11, 21360.638]	21272.4	0	(120.263, 121.259]	120.761	0.00882939
(21360.638, 21537.167]	21448.9	0	(121.259, 122.256]	121.757	0.00866788
(21537.167, 21713.696]	21625.4	0	(122.256, 123.253]	122.754	0.00767487
(21713.696, 21890.224]	21802	0	(123.253, 124.249]	123.751	0.00744157
(21890.224, 22066.753]	21978.5	0	(124.249, 125.246]	124.748	0.00675364
(22066.753, 22243.282]	22155	0	(125.246, 126.243]	125.744	0.00631696
(22243.282, 22419.811]	22331.5	0	(126.243, 127.239]	126.741	0.00589224
(22419.811, 22596.339]	22508.1	0	(127.239, 128.236]	127.737	0.00568885
(22596.339, 22772.868]	22684.6	0	(128.236, 129.233]	128.734	0.00525217
(22772.868, 22949.397]	22861.1	0	(129.233, 130.229]	129.731	0.00499495
(22949.397, 23125.925]	23037.7	0	(130.229, 131.226]	130.727	0.00451041
(23125.925, 23302.454]	23214.2	0	(131.226, 132.222]	131.724	0.00422327
(23302.454, 23478.983]	23390.7	0	(132.222, 133.219]	132.72	0.00398399
(23478.983, 23655.512]	23567.2	0	(133.219, 134.216]	133.718	0.00404381
(23655.512, 23832.04]	23743.8	0	(134.216, 135.212]	134.714	0.00366695
(23832.04, 24008.569]	23920.3	0	(135.212, 136.209]	135.71	0.00352936
(24008.569, 24185.098]	24096.8	0	(136.209, 137.206]	136.707	0.00315848
(24185.098, 24361.627]	24273.4	0	(137.206, 138.202]	137.704	0.00333794
(24361.627, 24538.155]	24449.9	0	(138.202, 139.199]	138.701	0.00316446
(24538.155, 24714.684]	24626.4	0	(139.199, 140.196]	139.697	0.00287733
(24714.684, 24891.213]	24802.9	0	(140.196, 141.192]	140.694	0.00256627
(24891.213, 25067.741]	24979.5	0	(141.192, 142.189]	141.69	0.00263805
(25067.741, 25244.27]	25156	0	(142.189, 143.186]	142.688	0.00236288
(25244.27, 25420.799]	25332.5	0	(143.186, 144.182]	143.684	0.00244663
(25420.799, 25597.328]	25509.1	0	(144.182, 145.179]	144.68	0.00221931
(25597.328, 25773.856]	25685.6	0	(145.179, 146.176]	145.678	0.00201592
(25773.856, 25950.385]	25862.1	0	(146.176, 147.172]	146.674	0.00190825
(25950.385, 26126.914]	26038.6	0	(147.172, 148.169]	147.671	0.00203387
(26126.914, 26303.442]	26215.2	0	(148.169, 149.166]	148.667	0.00181852
(26303.442, 26479.971]	26391.7	0	(149.166, 150.162]	149.664	0.00174674
(26479.971, 26656.5]	26568.2	0	(150.162, 151.159]	150.661	0.00170486
(26656.5, 26833.029]	26744.8	0	(151.159, 152.156]	151.657	0.00157326
(26833.029, 27009.557]	26921.3	0	(152.156, 153.152]	152.654	0.00157326
(27009.557, 27186.086]	27097.8	5.20684e-06	(153.152, 154.149]	153.65	0.00161513
(27186.086, 27362.615]	27274.4	0	(154.149, 155.146]	154.647	0.00132202
(27362.615, 27539.143]	27450.9	0	(155.146, 156.142]	155.644	0.00148951
(27539.143, 27715.672]	27627.4	0	(156.142, 157.139]	156.641	0.00147755
(27715.672, 27892.201]	27803.9	0	(157.139, 158.136]	157.637	0.00119639
(27892.201, 28068.73]	27980.5	0	(158.136, 159.132]	158.634	0.00108872
(28068.73, 28245.258]	28157	0	(159.132, 160.129]	159.63	0.00105881
(28245.258, 28421.787]	28333.5	0	(160.129, 161.126]	160.627	0.00110068
(28421.787, 28598.316]	28510.1	0	(161.126, 162.122]	161.624	0.00101693
(28598.316, 28774.844]	28686.6	0	(162.122, 163.119]	162.62	0.00105881
(28774.844, 28951.373]	28863.1	0	(163.119, 164.116]	163.618	0.00104684
(28951.373, 29127.902]	29039.6	0	(164.116, 165.112]	164.614	0.000993007
(29127.902, 29304.431]	29216.2	0	(165.112, 166.109]	165.611	0.00107675
(29304.431, 29480.959]	29392.7	0	(166.109, 167.106]	166.607	0.000981043
(29480.959, 29657.488]	29569.2	0	(167.106, 168.102]	167.604	0.000897296
(29657.488, 29834.017]	29745.8	0	(168.102, 169.099]	168.601	0.000777656
(29834.017, 30010.545]	29922.3	0	(169.099, 170.096]	169.597	0.00087935
(30010.545, 30187.074]	30098.8	0	(170.096, 171.092]	170.594	0.00078962
(30187.074, 30363.603]	30275.3	0	(171.092, 172.089]	171.59	0.00075971
(30363.603, 30540.132]	30451.9	0	(172.089, 173.085]	172.587	0.000652035
(30540.132, 30716.66]	30628.4	0	(173.085, 174.082]	173.583	0.00081953
(30716.66, 30893.189]	30804.9	0	(174.082, 175.079]	174.581	0.000610161
(30893.189, 31069.718]	30981.5	0	(175.079, 176.075]	175.577	0.000783638
(31069.718, 31246.246]	31158	0	(176.075, 177.072]	176.573	0.000717836
(31246.246, 31422.775]	31334.5	0	(177.072, 178.069]	177.57	0.000669981
(31422.775, 31599.304]	31511	0	(178.069, 179.065]	178.567	0.000574269
(31599.304, 31775.833]	31687.6	0	(179.065, 180.062]	179.564	0.000681945
(31775.833, 31952.361]	31864.1	0	(180.062, 181.059]	180.56	0.000544359
(31952.361, 32128.89]	32040.6	0	(181.059, 182.055]	181.557	0.000580251
(32128.89, 32305.419]	32217.2	0	(182.055, 183.052]	182.553	0.000669981
(32305.419, 32481.948]	32393.7	0	(183.052, 184.049]	183.55	0.000562305
(32481.948, 32658.476]	32570.2	0	(184.049, 185.045]	184.547	0.000532395
(32658.476, 32835.005]	32746.7	0	(185.045, 186.042]	185.543	0.000466594
(32835.005, 33011.534]	32923.3	0	(186.042, 187.039]	186.541	0.000538377
(33011.534, 33188.062]	33099.8	0	(187.039, 188.035]	187.537	0.000538377
(33188.062, 33364.591]	33276.3	0	(188.035, 189.032]	188.534	0.000400792
(33364.591, 33541.12]	33452.9	0	(189.032, 190.029]	189.53	0.000568287
(33541.12, 33717.649]	33629.4	0	(190.029, 191.025]	190.527	0.000412756
(33717.649, 33894.177]	33805.9	0	(191.025, 192.022]	191.524	0.000340972
(33894.177, 34070.706]	33982.4	0	(192.022, 193.019]	192.52	0.00039481
(34070.706, 34247.235]	34159	0	(193.019, 194.015]	193.517	0.000496504
(34247.235, 34423.763]	34335.5	0	(194.015, 195.012]	194.513	0.000460612
(34423.763, 34600.292]	34512	0	(195.012, 196.009]	195.51	0.000382846
(34600.292, 34776.821]	34688.6	0	(196.009, 197.005]	196.507	0.000406774
(34776.821, 34953.35]	34865.1	0	(197.005, 198.002]	197.504	0.000370882
(34953.35, 35129.878]	35041.6	0	(198.002, 198.999]	198.5	0.000287135
(35129.878, 35306.407]	35218.1	5.20684e-06	(198.999, 199.995]	199.497	0.000388828
