# Supplementary material for: Completing the SME Carbon Profile: Scalable Prediction of Scope 3 Emissions
Source: Research Square preprint supplement (doi:10.21203/rs.3.rs-8241893/v1), 2025-12-04
Supplement: Supplementary file 7 [file ffe01b666233d0131fbe8f01.xlsx]

## Sheet: Full Hotspot Mapper
Supporting Information S5			Code	1	2	3	4	5	6	7	8	9	10	11	12	13	14	15	16	17	18	19	20	21	22	23	24	25	26	27	28	29	30	31	32	33	34	35	36	37	38	39	40	41	42	43	44	45	46
			Heading 1	Adult	Arts & Entertainment	Arts & Entertainment	Arts & Entertainment	Arts & Entertainment	Arts & Entertainment	Arts & Entertainment	Arts & Entertainment	Arts & Entertainment	Arts & Entertainment	Arts & Entertainment	Arts & Entertainment	Arts & Entertainment	Arts & Entertainment	Arts & Entertainment	Arts & Entertainment	Arts & Entertainment	Arts & Entertainment	Arts & Entertainment	Arts & Entertainment	Arts & Entertainment	Arts & Entertainment	Arts & Entertainment	Arts & Entertainment	Arts & Entertainment	Arts & Entertainment	Arts & Entertainment	Arts & Entertainment	Arts & Entertainment	Arts & Entertainment	Arts & Entertainment	Arts & Entertainment	Arts & Entertainment	Arts & Entertainment	Arts & Entertainment	Arts & Entertainment	Arts & Entertainment	Arts & Entertainment	Arts & Entertainment	Arts & Entertainment	Arts & Entertainment	Arts & Entertainment	Arts & Entertainment	Arts & Entertainment	Arts & Entertainment	Arts & Entertainment
			Subheading 1			Celebrities & Entertainment News	Comics & Animation	Comics & Animation	Comics & Animation	Comics & Animation	Entertainment Industry	Entertainment Industry	Entertainment Industry	Events & Listings	Events & Listings	Events & Listings	Events & Listings	Events & Listings	Events & Listings	Fun & Trivia	Fun & Trivia	Fun & Trivia	Humor	Humor	Humor	Movies	Music & Audio	Music & Audio	Music & Audio	Music & Audio	Music & Audio	Music & Audio	Music & Audio	Music & Audio	Music & Audio	Music & Audio	Music & Audio	Music & Audio	Music & Audio	Music & Audio	Music & Audio	Music & Audio	Music & Audio	Music & Audio	Music & Audio	Offbeat	Offbeat	Online Media	Online Media
			Subheading 2					Anime & Manga	Cartoons	Comics		Film & TV Industry	Recording Industry		Bars Clubs & Nightlife	Concerts & Music Festivals	Expos & Conventions	Film Festivals	Movie Listings & Theater Showtimes		Flash-Based Entertainment	Fun Tests & Silly Surveys		Funny Pictures & Videos	Political Humor			CD & Audio Shopping	Classical Music	Country Music	Dance & Electronic Music	Experimental & Industrial Music	Jazz & Blues	Music Education & Instruction	Music Equipment & Technology	Music Reference	Music Streams & Downloads	Music Videos	Pop Music	Radio	Religious Music	Rock Music	Soundtracks	Urban & Hip-Hop	World Music		Occult & Paranormal		Online Image Galleries
			Aggregated	Adult	Arts & Entertainment	Arts & Entertainment	Arts & Entertainment	Arts & Entertainment	Arts & Entertainment	Arts & Entertainment	Arts & Entertainment	Arts & Entertainment	Arts & Entertainment	Arts & Entertainment	Arts & Entertainment	Arts & Entertainment	Arts & Entertainment	Arts & Entertainment	Arts & Entertainment	Arts & Entertainment	Arts & Entertainment	Arts & Entertainment	Arts & Entertainment	Arts & Entertainment	Arts & Entertainment	Arts & Entertainment	Music & Audio	Music & Audio	Music & Audio	Music & Audio	Music & Audio	Music & Audio	Music & Audio	Music & Audio	Music & Audio	Music & Audio	Music & Audio	Music & Audio	Music & Audio	Music & Audio	Music & Audio	Music & Audio	Music & Audio	Music & Audio	Music & Audio	Arts & Entertainment	Arts & Entertainment	Arts & Entertainment	Arts & Entertainment
Section	Division	Description
A. AGRICULTURE, FORESTRY AND FISHING
A	1	Crop and animal production, hunting and related service activities		0	0	0	0	0	0	0	0	0	0	0	0	0	0	0	0	0	0	0	0	0	0	0	0	0	0	0	0	0	0	0	0	0	0	0	0	0	0	0	0	0	0	0	0	0	0
A	2	Forestry and logging		0	0.001	0	0	0	0	0	0	0	0	0.003	0	0	0	0	0	0	0	0	0	0	0	0	0	0	0	0	0	0	0	0	0	0	0	0	0	0	0	0	0	0	0	0	0	0	0
A	3	Fishing and aquaculture		0	0.003	0	0	0	0	0	0	0	0	0	0	0	0	0	0	0	0	0	0	0	0	0	0	0	0	0	0	0	0	0	0	0	0	0	0	0	0	0	0	0	0	0	0	0	0
B. MINING AND QUARRYING
B	5	Mining of coal and lignite		0	0	0	0	0	0	0	0	0	0	0	0	0	0	0	0	0	0	0	0	0	0	0	0	0	0	0	0	0	0	0	0	0	0	0	0	0	0	0	0	0	0	0	0	0	0
B	6	Extraction of crude petroleum and natural gas		0	0	0	0	0	0	0	0	0	0	0	0	0	0	0	0	0	0	0	0	0	0	0	0	0	0	0	0	0	0	0	0	0	0	0	0	0	0	0	0	0	0	0	0	0	0
B	7	Mining of metal ores		0	0	0	0	0	0	0	0	0	0	0	0	0	0	0	0	0	0	0	0	0	0	0	0	0	0	0	0	0	0	0	0	0	0	0	0	0	0	0	0	0	0	0	0	0	0
B	8	Other mining and quarrying		0	0.002	0	0	0	0	0	0	0.001	0	0	0.001	0	0	0	0	0	0	0	0	0	0	0.001	0.001	0	0	0	0	0	0	0	0	0	0	0	0	0	0	0	0	0	0	0	0	0.001	0
B	9	Mining support service activities		0	0	0	0	0	0	0	0	0	0	0	0	0	0	0	0	0	0	0	0	0	0	0	0	0	0	0	0	0	0	0	0	0	0	0	0	0	0	0	0	0	0	0	0	0	0
C. MANUFACTURING
C	10	Manufacture of food products		0	0.002	0	0	0	0	0	0	0	0	0	0	0	0	0	0	0	0	0	0	0	0	0	0	0	0	0	0	0	0	0	0	0	0	0	0	0	0	0	0	0	0	0	0	0	0
C	11	Manufacture of beverages		0	0.005	0	0	0	0	0	0	0	0	0	0.014	0	0	0	0	0	0	0	0	0	0	0	0	0	0	0	0	0	0	0	0	0	0	0	0	0	0	0	0	0	0	0	0	0	0
C	12	Manufacture of tobacco products		0	0	0	0	0	0	0	0	0	0	0	0	0	0	0	0	0	0	0	0	0	0	0	0	0	0	0	0	0	0	0	0	0	0	0	0	0	0	0	0	0	0	0	0	0	0
C	13	Manufacture of textiles		0	0.004	0	0	0	0	0	0	0	0	0	0	0	0	0	0	0	0	0	0	0	0	0	0	0	0	0	0	0	0	0	0.002	0	0	0	0	0	0	0	0	0	0	0	0	0	0
C	14	Manufacture of wearing apparel		0	0.005	0	0	0	0	0	0	0.005	0	0	0	0	0	0	0	0	0	0	0	0	0	0	0	0	0	0	0	0	0	0	0	0	0	0	0	0	0	0	0	0	0	0	0	0	0
C	15	Manufacture of leather and related products		0	0.003	0	0	0	0	0	0.001	0.001	0.001	0	0.001	0	0	0	0	0	0	0	0	0	0	0.001	0.001	0	0	0	0	0	0	0	0.001	0	0	0	0	0	0	0	0	0	0	0	0	0.001	0
C	16	Manufacture of wood and of products of wood and cork, except furniture; manufacture of articles of straw and plaiting materials		0	0.002	0	0	0	0	0	0.001	0.002	0	0.001	0	0	0	0	0	0	0	0	0	0	0	0.001	0	0	0	0	0	0	0	0	0	0	0	0	0	0	0	0	0	0	0	0	0	0.002	0
C	17	Manufacture of paper and paper products		0	0.001	0	0	0	0	0	0	0.001	0	0	0.001	0	0	0	0	0	0	0	0	0	0	0	0	0	0	0	0	0	0	0	0	0	0	0	0	0	0	0	0	0	0	0	0	0.001	0
C	18	Printing and reproduction of recorded media		0	0.008	0	0	0	0	0	0	0.002	0.001	0	0	0	0	0	0	0	0	0	0	0	0	0	0.001	0	0	0	0	0	0	0	0	0	0	0	0	0	0	0	0	0	0	0	0	0.002	0
C	19	Manufacture of coke and refined petroleum products		0	0	0	0	0	0	0	0	0	0	0	0	0	0	0	0	0	0	0	0	0	0	0	0	0	0	0	0	0	0	0	0	0	0	0	0	0	0	0	0	0	0	0	0	0	0
C	20	Manufacture of chemicals and chemical products		0	0.001	0	0	0	0	0	0	0	0	0	0	0	0	0	0	0	0	0	0	0	0	0	0	0	0	0	0	0	0	0	0	0	0	0	0	0	0	0	0	0	0	0	0	0	0
C	21	Manufacture of basic pharmaceutical products and pharmaceutical preparations		0	0	0	0	0	0	0	0	0	0	0	0	0	0	0	0	0	0	0	0	0	0	0	0	0	0	0	0	0	0	0	0	0	0	0	0	0	0	0	0	0	0	0	0	0	0
C	22	Manufacture of rubber and plastic products		0	0	0	0	0	0	0	0	0	0	0	0	0	0	0	0	0	0	0	0	0	0	0	0	0	0	0	0	0	0	0	0	0	0	0	0	0	0	0	0	0	0	0	0	0.002	0
C	23	Manufacture of other non-metallic mineral products		0	0.002	0	0	0	0	0	0	0	0	0	0	0	0	0	0	0	0	0	0	0	0	0	0	0	0	0	0	0	0	0	0	0	0	0	0	0	0	0	0	0	0	0	0	0.002	0
C	24	Manufacture of basic metals		0	0.001	0	0	0	0	0	0	0	0	0	0.004	0	0	0	0	0	0	0	0	0	0	0	0	0	0	0	0	0	0	0	0	0	0	0	0	0	0	0	0	0.004	0	0	0	0	0
C	25	Manufacture of fabricated metal products, except machinery and equipment		0	0.001	0	0	0	0	0	0	0.001	0	0	0	0	0	0	0	0	0	0	0	0	0	0	0	0	0	0	0	0	0	0	0	0	0	0	0	0	0	0	0	0	0	0	0	0	0
C	26	Manufacture of computer, electronic and optical products		0	0.003	0	0	0	0	0	0	0.003	0	0	0	0	0	0	0	0	0	0	0	0	0	0	0	0	0	0	0	0	0	0	0	0	0	0	0	0	0	0	0	0	0	0	0	0	0
C	27	Manufacture of electrical equipment		0	0.005	0	0	0	0	0	0.001	0.002	0	0	0.001	0	0	0	0	0	0	0	0	0	0	0.001	0	0	0	0	0	0	0	0	0.001	0	0	0	0	0	0	0	0	0	0	0	0	0.003	0
C	28	Manufacture of machinery and equipment nec		0	0.001	0	0	0	0	0	0	0	0	0	0	0	0	0	0	0	0	0	0	0	0	0	0	0.001	0	0	0	0	0	0	0	0	0	0	0	0	0	0	0	0	0	0	0	0	0
C	29	Manufacture of motor vehicles, trailers and semi-trailers		0	0	0	0	0	0	0	0	0	0	0	0	0	0	0	0	0	0	0	0	0	0	0	0.002	0	0	0	0	0	0	0	0	0	0	0	0	0	0	0	0	0	0	0	0	0	0
C	30	Manufacture of other transport equipment		0	0.008	0	0	0	0	0	0	0	0	0	0	0	0	0	0	0	0	0	0	0	0	0	0	0	0	0	0	0	0	0	0	0	0	0	0	0	0	0	0	0	0	0	0	0	0
C	31	Manufacture of furniture		0	0.007	0	0	0	0	0	0	0	0	0	0	0	0	0	0	0	0	0	0	0	0	0	0.001	0	0	0	0	0	0	0	0	0	0	0	0	0	0	0	0	0	0	0	0	0.004	0
C	32	Other manufacturing		0	0.002	0	0	0	0	0	0	0	0	0	0.001	0	0	0	0	0	0	0	0	0	0	0	0.001	0	0	0	0	0	0	0	0.049	0	0	0	0	0	0	0	0	0.001	0	0	0	0.007	0
C	33	Repair and installation of machinery and equipment		0	0.001	0	0	0	0	0	0	0.001	0	0	0	0	0	0	0	0	0	0	0	0	0	0	0.006	0	0	0	0	0	0	0	0	0	0	0	0	0	0	0	0	0	0	0	0	0	0
D. ELECTRICITY, GAS, STEAM AND AIR CONDITIONING SUPPLY
D	35	Electricity, gas, steam and air conditioning supply		0	0	0	0	0	0	0	0	0	0	0	0	0	0	0	0	0	0	0	0	0	0	0	0	0	0	0	0	0	0	0	0	0	0	0	0	0	0	0	0	0	0	0	0	0	0
E. WATER SUPPLY; SEWERAGE, WASTE MANAGEMENT AND REMEDIATION ACTIVITIES
E	36	Water collection, treatment and supply		0	0	0	0	0	0	0	0	0	0	0	0	0	0	0	0	0	0	0	0	0	0	0	0	0	0	0	0	0	0	0	0	0	0	0	0	0	0	0	0	0	0	0	0	0	0
E	37	Sewerage		0	0	0	0	0	0	0	0	0	0	0	0	0	0	0	0	0	0	0	0	0	0	0	0	0	0	0	0	0	0	0	0	0	0	0	0	0	0	0	0	0	0	0	0	0	0
E	38	Waste collection, treatment and disposal activities; materials recovery		0	0	0	0	0	0	0	0	0	0	0	0	0	0	0	0	0	0	0	0	0	0	0	0	0	0	0	0	0	0	0	0	0	0	0	0	0	0	0	0	0	0	0	0	0	0
E	39	Remediation activities and other waste management services		0	0	0	0	0	0	0	0	0	0	0	0	0	0	0	0	0	0	0	0	0	0	0	0	0	0	0	0	0	0	0	0	0	0	0	0	0	0	0	0	0	0	0	0	0	0
F. CONSTRUCTION
F	41	Construction of buildings		0	0.003	0	0	0	0	0	0	0.001	0	0	0.002	0	0	0	0	0	0	0	0	0	0	0.001	0.001	0	0	0	0	0	0	0	0	0	0	0	0	0	0	0	0	0	0	0	0	0	0
F	42	Civil engineering		0	0.002	0	0	0	0	0	0	0	0	0	0	0	0	0	0	0	0	0	0	0	0	0	0	0	0	0	0	0	0	0	0	0	0	0	0	0	0	0	0	0	0	0	0	0	0
F	43	Specialised construction activities		0	0.003	0	0	0	0	0	0	0.001	0	0	0.001	0	0	0	0	0	0	0	0	0	0	0	0	0	0	0	0	0	0	0	0	0	0	0	0	0	0	0	0	0	0	0	0	0.001	0
G. WHOLESALE AND RETAIL TRADE; REPAIR OF MOTOR VEHICLES AND MOTORCYCLES
G	45	Wholesale and retail trade and repair of motor vehicles and motorcycles		0	0.003	0	0	0	0	0	0	0	0	0	0.001	0	0	0	0	0	0	0	0	0	0	0	0	0	0	0	0	0	0	0	0.001	0	0	0	0	0	0	0	0	0	0	0	0	0.002	0
G	46	Wholesale trade, except of motor vehicles and motorcycles		0	0.003	0	0	0	0	0	0	0.001	0	0	0	0	0	0	0	0	0	0	0	0	0	0	0.001	0.013	0	0	0	0	0	0	0.001	0	0	0	0	0	0	0	0	0	0	0	0	0	0
G	47	Retail trade, except of motor vehicles and motorcycles		0	0.004	0	0	0	0	0	0	0.001	0	0	0.001	0	0	0	0	0	0	0	0	0	0	0	0.001	0.001	0	0	0	0	0	0	0.007	0	0	0	0	0	0	0	0	0	0	0	0	0.002	0
H. TRANSPORTATION AND STORAGE
H	49	Land transport and transport via pipelines		0	0	0	0	0	0	0	0	0	0	0	0	0	0	0	0	0	0	0	0	0	0	0	0	0	0	0	0	0	0	0	0	0	0	0	0	0	0	0	0	0	0	0	0	0	0
H	50	Water transport		0	0.002	0	0	0	0	0	0	0.001	0	0	0.001	0	0	0	0	0	0	0	0	0	0	0	0.001	0	0	0	0	0	0	0	0	0	0	0	0	0	0	0	0	0	0	0	0	0.001	0
H	51	Air transport		0	0	0	0	0	0	0	0	0	0	0	0	0	0	0	0	0	0	0	0	0	0	0	0	0	0	0	0	0	0	0	0	0	0	0	0	0	0	0	0	0	0	0	0	0	0
H	52	Warehousing and support activities for transportation		0	0.003	0	0	0	0	0	0	0.002	0	0	0.002	0	0	0	0	0	0	0	0	0	0	0	0	0	0	0	0	0	0	0	0	0	0	0	0	0	0	0	0	0	0	0	0	0	0
H	53	Postal and courier activities		0	0	0	0	0	0	0	0	0	0	0	0	0	0	0	0	0	0	0	0	0	0	0	0	0	0	0	0	0	0	0	0	0	0	0	0	0	0	0	0	0	0	0	0	0	0
I. ACCOMMODATION AND FOOD SERVICE ACTIVITIES
I	55	Accommodation		0	0.004	0	0	0	0	0	0	0.001	0	0	0.006	0	0	0	0	0	0	0	0	0	0	0	0.001	0	0	0	0	0	0	0	0	0	0	0	0	0	0	0	0	0	0	0	0	0	0
I	56	Food and beverage service activities		0	0.004	0	0	0	0	0	0	0	0	0	0.207	0	0	0	0	0	0	0	0	0	0	0	0	0	0	0	0	0	0	0	0	0	0	0	0	0	0	0	0	0	0	0	0	0	0
J. INFORMATION AND COMMUNICATION
J	58	Publishing activities		0	0.017	0	0	0	0	0	0.003	0.003	0	0	0	0	0	0	0	0	0	0	0	0	0	0	0.003	0	0	0	0	0	0	0	0.003	0	0	0	0	0	0	0	0	0	0	0	0	0	0
J	59	Motion picture, video and television programme production, sound recording and music publishing activities		0	0.031	0	0	0	0	0	0.004	0.849	0.037	0	0	0	0	0	0	0	0	0	0	0	0	0.004	0.002	0	0	0	0	0	0	0	0	0	0	0	0	0	0	0	0	0	0	0	0	0.004	0
J	60	Programming and broadcasting activities		0	0.045	0	0	0	0	0	0.01	0.749	0	0	0	0	0	0	0	0	0	0	0	0	0	0	0	0.005	0	0	0	0	0	0	0	0	0	0	0	0.168	0	0	0	0	0	0	0	0	0
J	61	Telecommunications		0	0.015	0	0	0	0	0	0	0.007	0	0	0	0	0	0	0	0	0	0	0	0	0	0	0	0	0	0	0	0	0	0	0	0	0	0	0	0	0	0	0	0	0	0	0	0	0
J	62	Computer programming, consultancy and related activities		0	0.009	0	0	0	0	0	0	0.002	0.001	0	0.003	0	0	0	0	0	0	0	0	0	0	0.001	0.001	0.001	0	0	0	0	0	0	0	0	0	0	0	0	0	0	0	0	0	0	0	0.002	0
J	63	Information service activities		0	0.023	0	0	0	0	0	0	0.008	0	0	0.008	0	0	0	0	0	0	0	0.008	0	0	0	0	0	0	0	0	0	0	0	0	0	0	0	0	0	0	0	0	0	0	0	0	0	0
K. FINANCIAL AND INSURANCE ACTIVITIES
K	64	Financial service activities, except insurance and pension funding		0	0	0	0	0	0	0	0	0	0	0	0	0	0	0	0	0	0	0	0	0	0	0	0	0	0	0	0	0	0	0	0	0	0	0	0	0	0	0	0	0	0	0	0	0	0
K	65	Insurance, reinsurance and pension funding, except compulsory social security		0	0	0	0	0	0	0	0	0	0	0	0	0	0	0	0	0	0	0	0	0	0	0	0	0	0	0	0	0	0	0	0	0	0	0	0	0	0	0	0	0	0	0	0	0	0
K	66	Activities auxiliary to financial services and insurance activities		0	0	0	0	0	0	0	0	0	0	0	0	0	0	0	0	0	0	0	0	0	0	0	0	0	0	0	0	0	0	0	0	0	0	0	0	0	0	0	0	0	0	0	0	0	0
L. REAL ESTATE ACTIVITIES
L	68	Real estate activities		0	0	0	0	0	0	0	0	0	0	0	0	0	0	0	0	0	0	0	0	0	0	0	0	0	0	0	0	0	0	0	0	0	0	0	0	0	0	0	0	0	0	0	0	0	0
M. PROFESSIONAL, SCIENTIFIC AND TECHNICAL ACTIVITIES
M	69	Legal and accounting activities		0	0	0	0	0	0	0	0	0	0	0	0	0	0	0	0	0	0	0	0	0	0	0	0	0	0	0	0	0	0	0	0	0	0	0	0	0	0	0	0	0	0	0	0	0	0
M	70	Activities of head offices; management consultancy activities		0	0	0	0	0	0	0	0	0	0	0	0	0	0	0	0	0	0	0	0	0	0	0	0	0	0	0	0	0	0	0	0	0	0	0	0	0	0	0	0	0	0	0	0	0	0
M	71	Architectural and engineering activities; technical testing and analysis		0	0.006	0	0	0	0	0	0	0.003	0.001	0	0.002	0	0	0	0	0	0	0	0	0	0	0.001	0.001	0.001	0	0	0	0	0	0	0	0	0	0	0	0	0	0	0	0	0	0	0	0	0
M	72	Scientific research and development		0	0.012	0	0	0	0	0	0	0.001	0	0	0	0	0	0	0	0	0	0	0	0	0	0	0	0	0	0	0	0	0	0	0	0	0	0	0	0	0	0	0	0	0	0	0	0	0
M	73	Advertising and market research		0	0.021	0	0	0	0	0	0	0.015	0.001	0.001	0.002	0.001	0	0	0	0	0	0	0.001	0	0	0	0	0	0	0	0	0	0	0	0	0	0	0	0	0.005	0	0	0	0	0	0	0	0.011	0
M	74	Other professional, scientific and technical activities		0	0.008	0	0	0	0	0	0	0.004	0	0	0	0	0	0	0	0	0	0	0	0	0	0	0.001	0	0	0	0	0	0	0	0	0	0	0	0	0	0	0	0	0	0	0	0	0.013	0
M	75	Veterinary activities		0	0.013	0	0	0	0	0	0	0.003	0	0	0.003	0	0	0	0	0	0	0	0	0	0	0.003	0	0	0	0	0	0	0	0	0	0	0	0	0	0	0	0	0	0	0	0	0	0	0
N. ADMINISTRATIVE AND SUPPORT SERVICE ACTIVITIES
N	77	Rental and leasing activities		0	0	0	0	0	0	0	0	0	0	0	0	0	0	0	0	0	0	0	0	0	0	0	0	0	0	0	0	0	0	0	0	0	0	0	0	0	0	0	0	0	0	0	0	0	0
N	78	Employment activities		0	0.011	0	0	0	0	0	0.001	0.037	0.001	0	0.002	0	0	0	0	0	0	0	0	0	0	0.001	0.003	0	0	0	0	0	0	0	0	0	0	0	0	0	0	0.001	0	0	0	0	0	0	0
N	79	Travel agency, tour operator and other reservation service and related activities		0	0	0	0	0	0	0	0	0	0	0	0	0	0	0	0	0	0	0	0	0	0	0	0	0	0	0	0	0	0	0	0	0	0	0	0	0	0	0	0	0	0	0	0	0	0
N	80	Security and investigation activities		0	0	0	0	0	0	0	0	0	0	0	0	0	0	0	0	0	0	0	0	0	0	0	0	0	0	0	0	0	0	0	0	0	0	0	0	0	0	0	0	0	0	0	0	0	0
N	81	Services to buildings and landscape activities		0	0.006	0	0	0	0	0	0	0.002	0	0	0.002	0	0	0	0	0	0	0	0	0	0	0	0.001	0	0	0	0	0	0	0	0	0	0	0	0	0	0	0	0	0	0	0	0	0	0
N	82	Office administrative, office support and other business support activities		0	0.008	0	0	0	0	0	0.001	0.004	0	0	0.003	0	0.001	0	0	0	0	0	0	0	0	0	0	0	0	0	0	0	0	0	0	0	0	0	0	0.001	0	0	0	0	0	0	0	0.003	0
O. PUBLIC ADMINISTRATION AND DEFENCE; COMPULSORY SOCIAL SECURITY
O	84	Public administration and defence; compulsory social security		0	0.014	0	0	0	0	0	0	0.001	0	0	0.001	0	0	0	0	0	0	0	0	0	0	0.001	0.001	0	0	0	0	0	0	0	0	0	0	0	0	0	0	0	0	0	0	0	0	0.001	0
P. EDUCATION
P	85	Education		0	0.006	0	0	0	0	0	0	0.002	0	0	0.001	0	0	0	0	0	0	0	0	0	0	0.001	0.001	0	0	0	0	0	0	0	0	0	0	0	0	0	0	0	0	0	0	0	0	0.001	0
Q. HUMAN HEALTH AND SOCIAL WORK ACTIVITIES
Q	86	Human health activities		0	0.005	0	0	0	0	0	0	0.001	0	0	0	0	0	0	0	0	0	0	0	0	0	0.001	0	0	0	0	0	0	0	0	0	0	0	0	0	0	0	0	0	0	0	0	0	0	0
Q	87	Residential care activities		0	0.007	0	0	0	0	0	0	0	0	0	0	0	0	0	0	0	0	0	0	0	0	0	0	0	0	0	0	0	0	0	0	0	0	0	0	0	0	0	0	0	0	0	0	0	0
Q	88	Social work activities without accommodation		0	0.015	0	0	0	0	0	0.001	0.002	0.001	0.001	0.002	0	0	0	0	0	0	0	0	0	0	0.001	0.002	0	0	0	0	0	0	0	0	0	0	0	0	0.001	0	0	0	0	0	0	0	0.003	0
R. ARTS, ENTERTAINMENT AND RECREATION
R	90	Creative, arts and entertainment activities		0	0.222	0	0	0	0	0	0.076	0.004	0.005	0	0.002	0	0	0	0	0	0	0	0	0	0	0	0.003	0.001	0	0	0	0	0	0	0	0	0	0	0	0	0	0	0	0	0	0	0	0.009	0
R	91	Libraries, archives, museums and other cultural activities		0	0.141	0	0	0	0	0.005	0	0	0	0	0	0	0	0	0	0	0	0	0	0	0	0	0	0	0	0	0	0	0	0	0	0	0	0	0	0	0	0	0	0	0	0	0	0.014	0
R	92	Gambling and betting activities		0	0	0	0	0	0	0	0	0	0	0	0	0	0	0	0	0	0	0	0	0	0	0	0	0	0	0	0	0	0	0	0	0	0	0	0	0	0	0	0	0	0	0	0	0	0
R	93	Sports activities and amusement and recreation activities		0	0.006	0	0	0	0	0	0.001	0.001	0	0.001	0.003	0	0	0	0	0	0	0	0	0	0	0	0.001	0	0	0	0	0	0	0	0	0	0	0	0	0	0	0	0	0	0	0	0	0.002	0
S. OTHER SERVICE ACTIVITIES
S	94	Activities of membership organisations		0	0.004	0	0	0	0	0	0	0.002	0	0.002	0	0	0	0	0	0	0	0	0	0	0	0	0.004	0	0	0	0	0	0	0	0	0	0	0	0	0	0	0	0	0	0	0	0	0	0
S	95	Repair of computers and personal and household goods		0	0	0	0	0	0	0	0	0	0	0	0	0	0	0	0	0	0	0	0	0	0	0	0	0	0	0	0	0	0	0	0	0	0	0	0	0	0	0	0	0	0	0	0	0	0
S	96	Other personal service activities		0	0.006	0	0	0	0	0	0	0.001	0	0	0.001	0	0	0	0	0	0	0	0	0	0	0	0.001	0	0	0	0	0	0	0	0	0	0	0	0	0	0	0	0	0	0	0	0	0	0
T. ACTIVITIES OF HOUSEHOLDS AS EMPLOYERS; UNDIFFERENTIATED GOODS-AND SERVICES-PRODUCING ACTIVITIES OF HOUSEHOLDS FOR OWN USE
T	97	Activities of households as employers of domestic personnel		0	0	0	0	0	0	0	0	0	0	0	0	0	0	0	0	0	0	0	0	0	0	0	0	0	0	0	0	0	0	0	0	0	0	0	0	0	0	0	0	0	0	0	0	0	0
T	98	Undifferentiated goods- and services-producing activities of private households for own use		0	0	0	0	0	0	0	0	0	0	0	0	0	0	0	0	0	0	0	0	0	0	0	0	0	0	0	0	0	0	0	0	0	0	0	0	0	0	0	0	0	0	0	0	0	0
U. ACTIVITIES OF EXTRATERRITORIAL ORGANISATIONS AND BODIES
U	99	Activities of extraterritorial organisations and bodies		0	0	0	0	0	0	0	0	0	0	0	0	0	0	0	0	0	0	0	0	0	0	0	0	0	0	0	0	0	0	0	0	0	0	0	0	0	0	0	0	0	0	0	0	0	0
No. of Industries Hotspots Occurs in (>10% likelihood)				0	2	0	0	0	0	0	0	2	0	0	1	0	0	0	0	0	0	0	0	0	0	0	0	0	0	0	0	0	0	0	0	0	0	0	0	1	0	0	0	0	0	0	0	0	0
[truncated: 578 more columns]

## Sheet: Aggregated Mapper
			Aggregated Heading	Arts & Entertainment	Music & Audio	Performing Arts	TV & Video	Visual Art & Design	Autos & Vehicles	Fuel	Beauty & Fitness	Books & Literature	General Business & Industry	Agriculture & Forestry	Chemicals Industry	Construction & Maintenance	Electricity	Oil & Gas	Hospitality Industry	Industrial Materials & Equipment	Manufacturing	Metals & Mining	Pharmaceuticals & Biotech	Printing & Publishing	Retail Trade	Textiles & Nonwovens	Transportation & Logistics	Computers & Electronics	Finance	Food & Drink	Games	Health	Hobbies & Leisure	Home & Garden	Internet & Telecom	Jobs & Education	Law & Government	News	Pets & Animals	Real Estate	Science	Shopping	Apparel	Sports	Business Travel	Tourist Destinations	Water	Waste
Section	Division	Description
A. AGRICULTURE, FORESTRY AND FISHING				0.00698501	0	0.003	0	0.003	0.118139	0.14446	0.003	0	0.206746	0.999288	0.00797802	0.0788227	0	0	0	0.0717129	0.055232	0	0	0.003	0	0.001999	0.0709514	0.0208208	0.105102	0.109158	0	0.004993	0.0149192	0.005991	0.004993	0.003	0	0	0.005991	0.005991	0.009	0.047253	0.00698501	0	0.189297	0	0	0.006994
A	1	Crop and animal production, hunting and related service activities		0	0	0	0	0	0	0	0	0	0	0	0	0	0	0	0	0	0	0	0	0	0	0	0	0	0	0	0	0	0	0	0	0	0	0	0	0	0	0	0	0	0	0	0	0
A	2	Forestry and logging		0.003997	0	0.003	0	0.003	0.090157	0.127	0	0	0.172415	0.956194	0.005991	0.058202	0	0	0	0.051853	0.024	0	0	0.003	0	0.001	0.0492559	0.0119551	0.0860571	0.0677412	0	0.003997	0	0.005991	0.001	0.003	0	0	0.003	0.003	0.009	0.0337575	0.005991	0	0.143753	0	0	0.006
A	3	Fishing and aquaculture		0.003	0	0	0	0	0.0307548	0.02	0.003	0	0.0414832	0.983744	0.001999	0.021895	0	0	0	0.020946	0.032	0	0	0	0	0.001	0.0228195	0.00897303	0.0208386	0.0444268	0	0.001	0.0149192	0	0.003997	0	0	0	0.003	0.003	0	0.013967	0.001	0	0.0531906	0	0	0.001
B. MINING AND QUARRYING				0.00598602	0.001	0.001	0	0.001999	0.0614899	0.186	0.003994	0	0.288469	0.124884	0.0765983	0.191799	0	0	0.001	0.04192	0.015	0.913	0.001	0.001	0.002	0.002	0.0939507	0.00896508	0.0778732	0.0307094	0	0.00797305	0.00499101	0.002997	0.003995	0.003994	0	0.001	0.001	0.015971	0.001999	0.0248902	0.0179261	0.001999	0.0614927	0	0.001	0.063
B	5	Mining of coal and lignite		0	0	0	0	0	0	0	0	0	0	0	0	0	0	0	0	0	0	0	0	0	0	0	0	0	0	0	0	0	0	0	0	0	0	0	0	0	0	0	0	0	0	0	0	0
B	6	Extraction of crude petroleum and natural gas		0	0	0	0	0	0	0	0	0	0	0	0	0	0	0	0	0	0	0	0	0	0	0	0	0	0	0	0	0	0	0	0	0	0	0	0	0	0	0	0	0	0	0	0	0
B	7	Mining of metal ores		0	0	0	0	0	0	0	0	0	0	0	0	0	0	0	0	0	0	0	0	0	0	0	0	0	0	0	0	0	0	0	0	0	0	0	0	0	0	0	0	0	0	0	0	0
B	8	Other mining and quarrying		0.00598602	0.001	0.001	0	0.001999	0.0614899	0.186	0.003994	0	0.288469	0.124884	0.0765983	0.191799	0	0	0.001	0.04192	0.015	0.913	0.001	0.001	0.002	0.002	0.0939507	0.00896508	0.0778732	0.0307094	0	0.00797305	0.00499101	0.002997	0.003995	0.003994	0	0.001	0.001	0.015971	0.001999	0.0248902	0.0179261	0.001999	0.0614927	0	0.001	0.063
B	9	Mining support service activities		0	0	0	0	0	0	0	0	0	0	0	0	0	0	0	0	0	0	0	0	0	0	0	0	0	0	0	0	0	0	0	0	0	0	0	0	0	0	0	0	0	0	0	0	0
C. MANUFACTURING				0.12658	0.0697253	0.003997	0.003997	0.0516794	0.967885	0.126866	0.274319	0.002997	0.999699	0.780553	0.992461	0.998838	0	0.001999	0.0698699	0.999399	0.917468	0.862572	0.00698102	0.844027	0.0817777	0.895746	0.848972	0.96517	0.838532	0.996968	0.0209121	0.451287	0.179501	0.587052	0.204613	0.0392616	0	0.0149242	0.0384656	0.107955	0.0714877	0.907609	0.937141	0.11651	0.742598	0.002997	0.0247238	0.162419
C	10	Manufacture of food products		0.002	0	0	0	0.003995	0.0209141	0.003	0.002997	0	0.0777777	0.147506	0.018937	0.018952	0	0	0.025975	0.021	0.006	0	0	0	0.003	0	0.0454924	0.002998	0.0336048	0.85807	0	0.004993	0.003	0	0	0	0	0	0.0268411	0.005992	0.001	0.0538951	0.003997	0	0.0199081	0.001	0	0.003
C	11	Manufacture of beverages		0.01893	0	0	0	0	0.0277628	0.001	0.005	0	0.0797649	0.281334	0.0466059	0.0396	0	0	0.01	0.061939	0.015	0.005	0	0.005	0.001	0.001	0.0664512	0.001999	0.0287251	0.936163	0	0.001999	0.005	0.001	0.005995	0	0	0	0	0.001999	0.001	0.094	0.014941	0	0.0374578	0	0	0.005
C	12	Manufacture of tobacco products		0	0	0	0	0	0	0	0	0	0	0	0	0	0	0	0	0	0	0	0	0	0	0	0	0	0	0	0	0	0	0	0	0	0	0	0	0	0	0	0	0	0	0	0	0
C	13	Manufacture of textiles		0.004	0.002	0	0	0	0.057581	0.007	0.002	0	0.314352	0.0188862	0.0435248	0.084151	0	0	0.004	0.026908	0.07	0.002	0	0.004	0.011	0.684	0.0712753	0.002	0.0843272	0.0713426	0	0.005992	0.015952	0.175064	0.005992	0.002	0	0	0	0.005992	0	0.280338	0.0551056	0.002	0.0598443	0	0.002	0.007
C	14	Manufacture of wearing apparel		0.009975	0	0	0	0.005	0.0327825	0.001	0.005	0	0.0881464	0.0531294	0.01495	0.022888	0	0	0.001	0.002998	0.011	0.001	0	0.001	0.005	0.186	0.0835327	0.0119541	0.0839054	0.0694871	0	0.0149251	0.0149251	0.001	0.001999	0	0	0	0.005	0.001999	0.001	0.146	0.797389	0.005	0.0119551	0	0	0.001
C	15	Manufacture of leather and related products		0.00896706	0.001999	0.001	0	0.00499101	0.0385674	0.003	0.00697903	0.001	0.162984	0.0466698	0.0239171	0.030816	0	0	0.002	0.024954	0.005	0.002998	0.001	0.002	0.002	0.518	0.0841505	0.0307123	0.126595	0.0267117	0	0.0307282	0.00698003	0.00797305	0.0239151	0.00499001	0	0.001	0.001	0.00598901	0.003995	0.0863432	0.52335	0.003994	0.0683169	0.001	0.001	0.004
C	16	Manufacture of wood and of products of wood and cork, except furniture; manufacture of articles of straw and plaiting materials		0.00896706	0	0	0	0.003995	0.0660534	0.007	0.001999	0	0.596166	0.0540346	0.020892	0.931676	0	0	0	0.046954	0.028	0.005	0	0.002	0.002	0.001	0.040507	0.00797603	0.0509732	0.0408123	0	0.00598502	0.001	0.003995	0.002998	0	0	0.001	0	0.002998	0.002	0.0737154	0.0159221	0.002997	0.0585206	0	0.002	0.004
C	17	Manufacture of paper and paper products		0.003994	0	0	0	0.001	0.0238155	0.009	0.001999	0	0.39812	0.0346144	0.072048	0.088942	0	0	0.001	0.849151	0.049	0.001	0	0.016	0.016	0.001	0.182592	0.0198664	0.0865078	0.0582318	0	0.0277074	0.00998301	0.008992	0.002997	0.002997	0	0.008992	0	0.002998	0.001	0.0535012	0.01197	0.001999	0.0169062	0	0.001	0.017
C	18	Printing and reproduction of recorded media		0.0129521	0.001	0	0	0.00797902	0.0584302	0.001	0.001	0.001	0.293419	0.0208742	0.039601	0.069752	0	0	0.002	0.217783	0.056	0.012988	0.002	0.836	0.003996	0.04	0.127712	0.104201	0.154865	0.0613488	0	0.00995611	0.00797902	0.002998	0.010962	0.002998	0	0	0.001	0.009975	0.002998	0.189162	0.0405724	0	0.0434827	0	0	0.01
C	19	Manufacture of coke and refined petroleum products		0	0	0	0	0	0	0	0	0	0	0	0	0	0	0	0	0	0	0	0	0	0	0	0	0	0	0	0	0	0	0	0	0	0	0	0	0	0	0	0	0	0	0	0	0
C	20	Manufacture of chemicals and chemical products		0.001	0	0	0.003	0.003	0.043391	0.004	0.219295	0	0.134663	0.0258403	0.620067	0.14566	0	0	0.004	0.038962	0.038	0.001	0	0	0.001	0.004	0.102082	0.011961	0.0916709	0.082153	0	0.0218118	0.00798101	0.003	0.011	0.007	0	0	0	0.011	0.003	0.062764	0.007984	0.004	0.0258344	0	0	0.014
C	21	Manufacture of basic pharmaceutical products and pharmaceutical preparations		0	0	0	0	0	0	0	0	0	0	0	0	0	0	0	0	0	0	0	0	0	0	0	0	0	0	0	0	0	0	0	0	0	0	0	0	0	0	0	0	0	0	0	0	0
C	22	Manufacture of rubber and plastic products		0.002	0	0	0	0.003996	0.055043	0.002	0.002	0	0.339944	0.025895	0.955961	0.16115	0	0	0.002	0.119649	0.092	0.011	0	0.005	0	0.016	0.0869241	0.0119521	0.0654372	0.0268623	0	0.002	0.002	0.0109581	0.00598801	0.002	0	0	0	0.004994	0.002	0.0667443	0.00699	0.003	0.0287321	0	0.003	0.008
C	23	Manufacture of other non-metallic mineral products		0.003996	0	0	0	0.002	0.0407813	0.014	0.00797603	0	0.361773	0.0336492	0.083196	0.852289	0	0	0.003	0.034934	0.035	0.041	0.002	0	0.008	0.003	0.10343	0.004994	0.061637	0.0661349	0.002	0.003996	0.01296	0.0508082	0.004994	0.003	0	0	0	0.002	0.005	0.11256	0.0119491	0	0.0584749	0	0	0.013
C	24	Manufacture of basic metals		0.004996	0.004	0	0	0	0.0597829	0.005	0.004	0	0.455671	0.0179231	0.06975	0.099415	0	0	0	0.216	0.139	0.811648	0	0.004	0.004	0.001	0.0782825	0.007984	0.0702893	0.0326339	0	0.00897602	0.004996	0.004	0.001	0	0	0	0	0.001999	0.008	0.0298084	0.005	0.004	0.0408104	0	0	0.027
C	25	Manufacture of fabricated metal products, except machinery and equipment		0.001999	0	0	0	0.001	0.0754031	0.016	0.002997	0	0.381059	0.03168	0.033792	0.261425	0	0.001	0.001	0.10405	0.696	0.105	0	0.002	0.001	0.002	0.0356344	0.0109601	0.0529129	0.0427297	0	0.003994	0.003995	0.0457864	0.003997	0.001999	0	0	0.002	0.00698601	0.003	0.0568891	0.00598901	0.001	0.0721609	0	0.003	0.005
C	26	Manufacture of computer, electronic and optical products		0.005991	0	0	0	0	0.0535342	0.001	0	0	0.270116	0.00997302	0.021888	0.066988	0	0	0.003	0.180944	0.056	0.003	0	0.003	0	0.008	0.0912711	0.650213	0.122232	0.0426352	0	0.0218404	0.01097	0	0.0901592	0.003	0	0	0	0.003	0.01296	0.0989855	0.0149103	0	0.0356363	0	0	0.006
C	27	Manufacture of electrical equipment		0.0129362	0.001	0	0	0.001	0.0834266	0.008	0.002998	0	0.397224	0.0139391	0.011968	0.130446	0	0.001	0.002	0.108682	0.057	0.01	0.001	0.001	0.005	0.003	0.0561992	0.856683	0.0928613	0.0701333	0	0.00996406	0.002997	0.0447535	0.0159063	0.003	0	0.001	0	0.004	0.004993	0.0977123	0.00996704	0.003995	0.0936487	0	0.004	0.004
C	28	Manufacture of machinery and equipment nec		0.001	0.001	0	0	0.001999	0.0658511	0.017	0	0	0.239608	0.0901543	0.04746	0.100378	0	0	0.007	0.75448	0.099	0.032968	0	0.002	0.004	0.005	0.0745952	0.0267916	0.0789868	0.0610814	0	0.0159013	0.003995	0.003995	0.001999	0.002997	0	0.002	0	0.002998	0.004	0.035965	0.00996505	0	0.0475218	0	0.002	0.007
C	29	Manufacture of motor vehicles, trailers and semi-trailers		0	0.002	0	0	0.002	0.729675	0.006	0.00798002	0	0.275415	0.0248085	0.0376086	0.076543	0	0	0.002	0.058682	0.067	0.02	0	0	0.002	0.012	0.0988703	0.0119441	0.0943814	0.0883336	0	0.00798002	0.02	0.00598801	0.002	0	0	0	0	0.00996803	0	0.108634	0.002	0.002	0.0874827	0	0.004	0.01
C	30	Manufacture of other transport equipment		0.008	0	0.003	0	0.003	0.653473	0.01	0.003	0	0.244567	0.0218553	0.060126	0.107096	0	0	0	0.241453	0.066	0.013	0	0	0.003	0.013	0.091505	0.0169012	0.0599657	0.0503266	0	0.0169012	0.0385349	0	0.0119461	0	0	0	0	0.005	0.003	0.077	0.007985	0.005991	0.22008	0	0	0.003
C	31	Manufacture of furniture		0.010972	0.001	0	0	0.00698501	0.0641685	0.007	0.004992	0	0.715061	0.0424436	0.041563	0.32575	0	0	0.001	0.038892	0.059	0.007	0	0	0.005995	0.044	0.0970442	0.0159132	0.0964428	0.0697938	0	0.005995	0.00897403	0.301896	0.005995	0.001	0	0	0.001	0.00897902	0.00898501	0.229203	0.0149421	0.001999	0.0925178	0.001	0	0.023
C	32	Other manufacturing		0.00997701	0.050901	0	0.001	0	0.0447205	0.007	0.00797603	0.001	0.232536	0.0248036	0.0657428	0.067942	0	0	0	0.074716	0.26	0.026974	0.001	0.002	0.001	0.016	0.140198	0.0198604	0.122406	0.0565433	0.01895	0.308239	0.011964	0.119881	0.006994	0.002997	0	0.001	0.001999	0.00798301	0	0.18803	0.16804	0.073	0.0467094	0	0.002	0.004
C	33	Repair and installation of machinery and equipment		0.001999	0.006	0	0	0.001	0.123317	0.006	0.001999	0	0.198015	0.344399	0.022898	0.078142	0	0	0.001	0.905724	0.017	0.006	0	0.001	0.006	0.001	0.0357634	0.0347714	0.0770751	0.0435161	0	0.00798701	0.001999	0.006	0.006994	0	0	0	0	0.006994	0.006	0.057943	0.001999	0.006	0.123697	0	0.001	0.001
D. ELECTRICITY, GAS, STEAM AND AIR CONDITIONING SUPPLY				0	0	0	0	0	0	0	0	0	0	0	0	0	0	0	0	0	0	0	0	0	0	0	0	0	0	0	0	0	0	0	0	0	0	0	0	0	0	0	0	0	0	0	0	0
D	35	Electricity, gas, steam and air conditioning supply		0	0	0	0	0	0	0	0	0	0	0	0	0	0	0	0	0	0	0	0	0	0	0	0	0	0	0	0	0	0	0	0	0	0	0	0	0	0	0	0	0	0	0	0	0
E. WATER SUPPLY; SEWERAGE, WASTE MANAGEMENT AND REMEDIATION ACTIVITIES				0	0	0	0	0	0	0	0	0	0	0	0	0	0	0	0	0	0	0	0	0	0	0	0	0	0	0	0	0	0	0	0	0	0	0	0	0	0	0	0	0	0	0	0	0
E	36	Water collection, treatment and supply		0	0	0	0	0	0	0	0	0	0	0	0	0	0	0	0	0	0	0	0	0	0	0	0	0	0	0	0	0	0	0	0	0	0	0	0	0	0	0	0	0	0	0	0	0
E	37	Sewerage		0	0	0	0	0	0	0	0	0	0	0	0	0	0	0	0	0	0	0	0	0	0	0	0	0	0	0	0	0	0	0	0	0	0	0	0	0	0	0	0	0	0	0	0	0
E	38	Waste collection, treatment and disposal activities; materials recovery		0	0	0	0	0	0	0	0	0	0	0	0	0	0	0	0	0	0	0	0	0	0	0	0	0	0	0	0	0	0	0	0	0	0	0	0	0	0	0	0	0	0	0	0	0
E	39	Remediation activities and other waste management services		0	0	0	0	0	0	0	0	0	0	0	0	0	0	0	0	0	0	0	0	0	0	0	0	0	0	0	0	0	0	0	0	0	0	0	0	0	0	0	0	0	0	0	0	0
F. CONSTRUCTION				0.0149034	0.001	0	0	0.002997	0.203525	0.0395127	0.00499101	0	0.933252	0.074574	0.0393682	0.999656	0	0.001	0.003995	0.0870379	0.0433621	0.0139371	0.001	0.002997	0.004994	0.002998	0.0670162	0.0315801	0.190252	0.16031	0	0.0158894	0.0109561	0.0267048	0.0119412	0.00499001	0	0	0	0.0258037	0.00598701	0.224315	0.0198298	0.001999	0.222456	0	0.0337993	0.0521491
F	41	Construction of buildings		0.00698302	0.001	0	0	0.001	0.0563717	0.006	0.002998	0	0.521366	0.0258164	0.009976	0.958693	0	0.001	0.002	0.02291	0.013	0.006	0.001	0.001	0.002	0.001	0.0228611	0.0109561	0.109955	0.0476193	0	0.00698601	0.005992	0.00499101	0.003997	0.001999	0	0	0	0.019936	0.002998	0.0687992	0.00798101	0	0.059331	0	0.004	0.017
F	42	Civil engineering		0.002	0	0	0	0.001	0.0724595	0.015	0.001	0	0.645826	0.0337018	0.00898	0.95915	0	0	0.001	0.032838	0.014	0.005	0	0.001	0	0	0.0267993	0.002998	0.0403619	0.0595097	0	0.003995	0.002	0.001	0.002998	0.001999	0	0	0	0.002998	0.001	0.057943	0.00598901	0.001	0.0834435	0	0.003	0.027
F	43	Specialised construction activities		0.00598801	0	0	0	0.001	0.090006	0.019	0.001	0	0.606251	0.0169181	0.020896	0.796275	0	0	0.001	0.033907	0.017	0.003	0	0.001	0.003	0.002	0.0188952	0.0179082	0.0519512	0.0625374	0	0.00499101	0.003	0.0208435	0.004993	0.001	0	0	0	0.002998	0.002	0.115771	0.005991	0.001	0.0981618	0	0.027	0.009
G. WHOLESALE AND RETAIL TRADE; REPAIR OF MOTOR VEHICLES AND MOTORCYCLES				0.0178616	0.0247997	0	0	0.0119551	0.848176	0.0258332	0.0529732	0.011	0.491458	0.256747	0.0999591	0.318181	0	0	0.00698501	0.220276	0.0666676	0.0228872	0.005995	0.011965	0.131123	0.0735247	0.2936	0.117475	0.296976	0.627738	0.005991	0.0970813	0.0373876	0.127855	0.0257079	0.00698003	0	0.00798701	0.00798701	0.0286719	0.002997	0.364921	0.204594	0.00896706	0.116559	0.001	0.005991	0.0336333
G	45	Wholesale and retail trade and repair of motor vehicles and motorcycles		0.00598901	0.001	0	0	0.001	0.836562	0.017	0.001999	0	0.139687	0.0277537	0.015952	0.047473	0	0	0.001	0.024934	0.01	0.003	0	0.001	0.003	0.002	0.0549824	0.0109511	0.0842386	0.0585187	0	0.00598602	0.008992	0.001	0.005991	0.001	0	0.001	0	0.01495	0.001	0.0948989	0.00996605	0.001999	0.0710136	0	0.001	0.016
G	46	Wholesale trade, except of motor vehicles and motorcycles		0.003997	0.014973	0	0	0.001	0.035706	0.007	0.037667	0	0.250626	0.203247	0.0668048	0.216574	0	0	0.003	0.176478	0.038	0.017	0.001	0.003	0.021895	0.036	0.168802	0.0500493	0.153997	0.286862	0	0.0208515	0.00797902	0.0573239	0.00698202	0.002997	0	0.001	0.001	0.003997	0.001	0.0639819	0.059424	0.001	0.0218525	0.001	0.004	0.01
G	47	Retail trade, except of motor vehicles and motorcycles		0.00797902	0.00898501	0	0	0.00997602	0.0366654	0.002	0.0139341	0.011	0.211193	0.0405179	0.0198931	0.08632	0	0	0.003	0.028972	0.02	0.002998	0.005	0.008	0.109	0.037	0.100696	0.0606911	0.0925648	0.445549	0.005991	0.0723	0.0208406	0.0738935	0.0129441	0.002998	0	0.006	0.006994	0.00997302	0.001	0.250372	0.145828	0.00598801	0.0277818	0	0.001	0.008
H. TRANSPORTATION AND STORAGE				0.0119402	0.001	0.001	0	0.002997	0.1205	0.07974	0.00896806	0	0.204978	0.0699763	0.0129322	0.0703301	0	0	0.005995	0.0258374	0.024844	0.003997	0.001	0.001	0.001999	0.003996	0.894784	0.022796	0.0920896	0.116512	0.001999	0.0247504	0.0178953	0.001999	0.0109571	0.00499001	0	0.001999	0	0.0178963	0.001999	0.059828	0.0129441	0.001999	0.744808	0.01	0.001999	0.024844
H	49	Land transport and transport via pipelines		0	0	0	0	0	0	0	0	0	0	0	0	0	0	0	0	0	0	0	0	0	0	0	0	0	0	0	0	0	0	0	0	0	0	0	0	0	0	0	0	0	0	0	0	0
H	50	Water transport		0.00499101	0.001	0.001	0	0.001	0.0501963	0.021	0.002997	0	0.0306776	0.0356478	0.004992	0.017935	0	0	0.001	0.004996	0.012	0.001	0.001	0.001	0.001	0.002	0.39203	0.0169102	0.0443107	0.0732994	0	0.0169102	0.011979	0.001999	0.003995	0.003994	0	0.001	0	0.002998	0.001999	0.0298902	0.00598602	0.001999	0.724133	0.01	0.001	0.012
H	51	Air transport		0	0	0	0	0	0	0	0	0	0	0	0	0	0	0	0	0	0	0	0	0	0	0	0	0	0	0	0	0	0	0	0	0	0	0	0	0	0	0	0	0	0	0	0	0
H	52	Warehousing and support activities for transportation		0.00698401	0	0	0	0.001999	0.0740193	0.06	0.00598901	0	0.179817	0.0355974	0.00798002	0.053352	0	0	0.005	0.020946	0.013	0.003	0	0	0.001	0.002	0.826939	0.00598701	0.0499942	0.0466301	0.001999	0.00797504	0.00598801	0	0.00699	0.001	0	0.001	0	0.0149431	0	0.0308603	0.007	0	0.0749462	0	0.001	0.013
H	53	Postal and courier activities		0	0	0	0	0	0	0	0	0	0	0	0	0	0	0	0	0	0	0	0	0	0	0	0	0	0	0	0	0	0	0	0	0	0	0	0	0	0	0	0	0	0	0	0	0
I. ACCOMMODATION AND FOOD SERVICE ACTIVITIES				0.218833	0.001	0	0	0.001999	0.0817031	0.012	0.00698003	0	0.190305	0.0776145	0.00499101	0.126828	0	0.005995	0.067868	0.0189051	0.01198	0.001	0	0.001	0.002998	0.003997	0.0355298	0.00896706	0.106992	0.948751	0	0.0119451	0.00897303	0.003995	0.0179082	0.003994	0	0.001	0	0.0267234	0.002997	0.237612	0.0139193	0	0.947797	0.001999	0.01099	0.049384
I	55	Accommodation		0.010966	0.001	0	0	0.001	0.0686974	0.012	0.003995	0	0.154502	0.0570165	0.002998	0.107264	0	0.005	0.002	0.011989	0.01	0.001	0	0.001	0.002	0.003	0.01594	0.00698202	0.0861622	0.401304	0	0.00798202	0.004996	0.002998	0.011989	0.002997	0	0.001	0	0.0169191	0.002997	0.200013	0.00797803	0	0.946793	0.001	0.01	0.028
I	56	Food and beverage service activities		0.210172	0	0	0	0.001	0.013965	0	0.002997	0	0.0423452	0.0218434	0.001999	0.021915	0	0.001	0.066	0.007	0.002	0	0	0	0.001	0.001	0.0199071	0.001999	0.0227939	0.914399	0	0.003995	0.003997	0.001	0.005991	0.001	0	0	0	0.00997302	0	0.047	0.00598901	0	0.0188704	0.001	0.001	0.022
J. INFORMATION AND COMMUNICATION				0.970424	0.180407	0.0208376	0.003995	0.034549	0.407546	0.0665132	0.0489025	0.006994	0.87036	0.131274	0.035445	0.293332	0	0	0.00598701	0.136488	0.0470918	0.0178804	0.003	0.899186	0.0393496	0.0228196	0.358093	0.619625	0.669106	0.684732	0.0238424	0.0917541	0.0450606	0.00995909	0.922595	0.0584498	0	0.402019	0	0.098382	0.0325552	0.719818	0.0891678	0.0139193	0.61054	0.001	0.006989	0.0267401
J	58	Publishing activities		0.0228892	0.005991	0.003	0	0.003	0.0770507	0.003	0.003	0.006	0.235339	0.0149281	0.011964	0.04849	0	0	0	0.023	0.014	0.003	0.003	0.896	0.003	0.011	0.176782	0.0384967	0.165024	0.0999074	0.003	0.0237761	0.011964	0.003	0.019	0.005991	0	0.003	0	0.016934	0.006	0.149549	0.0199071	0.003	0.0690139	0	0	0.011
J	59	Motion picture, video and television programme production, sound recording and music publishing activities		0.860779	0.002	0.004	0.002	0.017968	0.0739734	0.004	0.002	0	0.242911	0.0258164	0.00598801	0.058312	0	0	0.002	0.022	0.008	0.002	0	0.002	0.01	0.002	0.0452771	0.0355034	0.15367	0.127	0	0.0119481	0.005992	0.002	0.0198644	0	0	0.002	0	0.019964	0	0.31356	0.005992	0.005992	0.186432	0	0	0.001
J	60	Programming and broadcasting activities		0.762692	0.17216	0.005	0	0.005995	0.103595	0.006	0.01	0	0.229389	0.0326631	0.001999	0.061139	0	0	0.001	0.021979	0.002	0.001	0	0.01	0.005	0.006	0.0486595	0.0168943	0.127004	0.123082	0.005	0.0208554	0.009975	0.001	0.02098	0.005	0	0	0	0.015945	0.005995	0.226885	0.011989	0	0.23615	0	0.005	0.001
J	61	Telecommunications		0.021895	0	0	0	0.004	0.103926	0.036	0.0149281	0	0.278022	0.0238174	0.001999	0.069031	0	0	0	0.042748	0.005	0.001	0	0.004	0.008	0.001	0.0307612	0.0850248	0.140705	0.125323	0	0.0119521	0.007	0	0.78883	0.004	0	0.004	0	0.015985	0.007	0.115	0.0119521	0	0.13899	0	0	0.004
J	62	Computer programming, consultancy and related activities		0.0178883	0.001999	0.001	0.001999	0.002998	0.0837492	0.003	0.0099581	0.001	0.405392	0.0149321	0.003995	0.0652	0	0	0.002	0.023977	0.01	0.002998	0	0.007	0.005995	0.002	0.0520827	0.535214	0.236932	0.0906208	0.001	0.0218128	0.00897005	0.002997	0.429216	0.0129352	0	0.001	0	0.0169141	0.005991	0.194663	0.0168864	0.00499001	0.084155	0.001	0.001	0.008
J	63	Information service activities		0.0462609	0	0.008	0	0.001	0.0581298	0.016	0.00998301	0	0.323088	0.0268063	0.009991	0.03475	0	0	0.001	0.01099	0.009	0.008	0	0.008	0.008	0.001	0.0655779	0.0189341	0.181991	0.424789	0.015	0.00499001	0.001999	0.001	0.317787	0.0316663	0	0.396	0	0.016928	0.008	0.128991	0.0258233	0	0.146335	0	0.001	0.002
K. FINANCIAL AND INSURANCE ACTIVITIES				0	0	0	0	0	0	0	0	0	0	0	0	0	0	0	0	0	0	0	0	0	0	0	0	0	0	0	0	0	0	0	0	0	0	0	0	0	0	0	0	0	0	0	0	0
K	64	Financial service activities, except insurance and pension funding		0	0	0	0	0	0	0	0	0	0	0	0	0	0	0	0	0	0	0	0	0	0	0	0	0	0	0	0	0	0	0	0	0	0	0	0	0	0	0	0	0	0	0	0	0
K	65	Insurance, reinsurance and pension funding, except compulsory social security		0	0	0	0	0	0	0	0	0	0	0	0	0	0	0	0	0	0	0	0	0	0	0	0	0	0	0	0	0	0	0	0	0	0	0	0	0	0	0	0	0	0	0	0	0
K	66	Activities auxiliary to financial services and insurance activities		0	0	0	0	0	0	0	0	0	0	0	0	0	0	0	0	0	0	0	0	0	0	0	0	0	0	0	0	0	0	0	0	0	0	0	0	0	0	0	0	0	0	0	0	0
L. REAL ESTATE ACTIVITIES				0	0	0	0	0	0	0	0	0	0	0	0	0	0	0	0	0	0	0	0	0	0	0	0	0	0	0	0	0	0	0	0	0	0	0	0	0	0	0	0	0	0	0	0	0
L	68	Real estate activities		0	0	0	0	0	0	0	0	0	0	0	0	0	0	0	0	0	0	0	0	0	0	0	0	0	0	0	0	0	0	0	0	0	0	0	0	0	0	0	0	0	0	0	0	0
M. PROFESSIONAL, SCIENTIFIC AND TECHNICAL ACTIVITIES				0.119024	0.00798202	0.001	0.00898001	0.453554	0.365752	0.0615581	0.0305521	0.00898001	0.991954	0.179862	0.108594	0.425948	0	0	0.010963	0.193764	0.111028	0.0247927	0.010966	0.0682746	0.0564957	0.0621023	0.259687	0.112101	0.637742	0.391606	0.001	0.330175	0.222142	0.025706	0.0974559	0.0256991	0	0.00798301	0.827273	0.268246	0.833825	0.749035	0.0734641	0.0109571	0.444942	0.001	0.0129441	0.0701334
M	69	Legal and accounting activities		0	0	0	0	0	0	0	0	0	0	0	0	0	0	0	0	0	0	0	0	0	0	0	0	0	0	0	0	0	0	0	0	0	0	0	0	0	0	0	0	0	0	0	0	0
M	70	Activities of head offices; management consultancy activities		0	0	0	0	0	0	0	0	0	0	0	0	0	0	0	0	0	0	0	0	0	0	0	0	0	0	0	0	0	0	0	0	0	0	0	0	0	0	0	0	0	0	0	0	0
M	71	Architectural and engineering activities; technical testing and analysis		0.0129411	0.001999	0.001	0	0.00898001	0.135624	0.023	0.00896806	0	0.858294	0.0336542	0.012958	0.165022	0	0	0.003	0.048742	0.027	0.005	0.001	0.004	0.003	0.003	0.0443491	0.0277273	0.166358	0.0936469	0	0.0178695	0.00998301	0.00598602	0.0218623	0.00499101	0	0.001	0	0.0179121	0.0848331	0.11167	0.010963	0	0.142035	0.001	0.004	0.009
M	72	Scientific research and development		0.012988	0	0	0.006	0.006994	0.0454972	0.012	0.001999	0.006	0.295231	0.0423561	0.0414619	0.104791	0	0	0.006	0.059244	0.019	0.012	0.006	0.006	0.001	0.001	0.113067	0.0484512	0.259893	0.0520091	0	0.052791	0.006994	0.006994	0.0188803	0	0	0	0	0.017928	0.815115	0.094906	0.013945	0	0.0598697	0	0.006	0.029
M	73	Advertising and market research		0.0520014	0.005	0	0.002998	0.006	0.0794526	0.007	0.00896607	0.002998	0.855267	0.0208663	0.011961	0.088039	0	0	0.001	0.055945	0.043	0.006	0.004	0.057	0.003	0.011	0.0655571	0.0277045	0.171847	0.140578	0	0.023783	0.00698601	0.00499001	0.0394766	0.00798301	0	0.002	0.001	0.014974	0.001999	0.226353	0.0248603	0.00996704	0.138344	0	0.001	0.012
M	74	Other professional, scientific and technical activities		0.0248124	0.001	0	0	0.439686	0.0941189	0.018	0.002997	0	0.387642	0.011964	0.015945	0.111235	0	0	0.001	0.007993	0.014	0.002	0	0.002	0.003	0.045	0.0346888	0.00996406	0.0888733	0.1159	0.001	0.00797504	0.003997	0.005	0.014973	0.003995	0	0	0	0.009979	0.004996	0.568629	0.00997701	0.001	0.13377	0	0.002	0.004
M	75	Veterinary activities		0.0218564	0	0	0	0.003	0.0781462	0.003	0.00797902	0	0.0909406	0.083916	0.03097	0.05248	0	0	0	0.038	0.013	0	0	0	0.047	0.003	0.0317111	0.003	0.221865	0.0680867	0	0.256506	0.2	0.003	0.005991	0.00897303	0	0.005	0.8271	0.222	0.010976	0.0647	0.0159062	0	0.0780368	0	0	0.018
N. ADMINISTRATIVE AND SUPPORT SERVICE ACTIVITIES				0.0804203	0.00598801	0.005991	0.001	0.00997103	0.344044	0.217666	0.028623	0	0.91957	0.133155	0.0364962	0.276674	0	0	0.00797902	0.0867458	0.0425275	0.00698501	0.002	0.0307702	0.0178952	0.014953	0.194175	0.065091	0.356799	0.459057	0.001999	0.0974888	0.027679	0.525205	0.0793172	0.746947	0	0.001	0.00996605	0.0403328	0.00996207	0.49113	0.0614082	0.00896408	0.487878	0.003995	0.006988	0.0425712
N	77	Rental and leasing activities		0	0	0	0	0	0	0	0	0	0	0	0	0	0	0	0	0	0	0	0	0	0	0	0	0	0	0	0	0	0	0	0	0	0	0	0	0	0	0	0	0	0	0	0	0
N	78	Employment activities		0.0523465	0.003997	0.004	0.001	0.001999	0.0992399	0.01	0.00897005	0	0.330665	0.0248124	0.002998	0.09196	0	0	0.004	0.009984	0.006	0.001999	0	0.01	0.008	0.001	0.0598989	0.0287517	0.193936	0.131927	0.001	0.0605414	0.007985	0.00996008	0.0307088	0.744912	0	0	0.001	0.016945	0.001999	0.104205	0.0258682	0.003994	0.0949784	0.002998	0	0.005
N	79	Travel agency, tour operator and other reservation service and related activities		0	0	0	0	0	0	0	0	0	0	0	0	0	0	0	0	0	0	0	0	0	0	0	0	0	0	0	0	0	0	0	0	0	0	0	0	0	0	0	0	0	0	0	0	0
N	80	Security and investigation activities		0	0	0	0	0	0	0	0	0	0	0	0	0	0	0	0	0	0	0	0	0	0	0	0	0	0	0	0	0	0	0	0	0	0	0	0	0	0	0	0	0	0	0	0	0
N	81	Services to buildings and landscape activities		0.00997202	0.001	0.001	0	0.002	0.19059	0.187	0.00797802	0	0.423385	0.077366	0.012968	0.10982	0	0	0.001	0.024934	0.009	0.001	0	0.001	0.005	0.003	0.0405125	0.00499101	0.0888562	0.269319	0	0.0119471	0.00798701	0.517055	0.023956	0.003994	0	0	0.006989	0.00698501	0.002	0.267204	0.0109581	0.001999	0.346558	0	0.004	0.03
N	82	Office administrative, office support and other business support activities		0.0198505	0.001	0.001	0	0.006	0.100301	0.028	0.0119481	0	0.791605	0.0365618	0.020902	0.105148	0	0	0.002998	0.053947	0.028	0.004	0.002	0.02	0.005	0.011	0.106639	0.0325867	0.12423	0.147161	0.001	0.0277124	0.011961	0.00698501	0.0268353	0.003997	0	0.001	0.002	0.0169241	0.005991	0.224798	0.0258084	0.002997	0.134021	0.001	0.003	0.008
O. PUBLIC ADMINISTRATION AND DEFENCE; COMPULSORY SOCIAL SECURITY				0.0179381	0.001	0.001	0	0.001999	0.266456	0.167	0.003994	0.001	0.455628	0.0345987	0.017941	0.200419	0	0	0.014	0.15669	0.142	0.002	0.001	0.001	0.002	0.014	0.133306	0.0208813	0.114407	0.229666	0	0.0316742	0.00598602	0.0297346	0.015971	0.003994	0	0.001	0.001	0.016956	0.014986	0.211952	0.00598602	0.001999	0.31576	0	0.001	0.015
O	84	Public administration and defence; compulsory social security		0.0179381	0.001	0.001	0	0.001999	0.266456	0.167	0.003994	0.001	0.455628	0.0345987	0.017941	0.200419	0	0	0.014	0.15669	0.142	0.002	0.001	0.001	0.002	0.014	0.133306	0.0208813	0.114407	0.229666	0	0.0316742	0.00598602	0.0297346	0.015971	0.003994	0	0.001	0.001	0.016956	0.014986	0.211952	0.00598602	0.001999	0.31576	0	0.001	0.015
P. EDUCATION				0.0109611	0.001	0.002	0	0.001	0.0821044	0.036	0.00598801	0	0.141436	0.0188922	0.003996	0.086793	0	0.006	0.027973	0.006994	0.005	0.002	0	0.002	0.003	0.002	0.0218584	0.0168824	0.123495	0.141741	0	0.0198575	0.011968	0.001999	0.0218573	0.707727	0	0	0.001	0.015941	0.003	0.145429	0.00998301	0.004992	0.120976	0	0.006	0.028
P	85	Education		0.0109611	0.001	0.002	0	0.001	0.0821044	0.036	0.00598801	0	0.141436	0.0188922	0.003996	0.086793	0	0.006	0.027973	0.006994	0.005	0.002	0	0.002	0.003	0.002	0.0218584	0.0168824	0.123495	0.141741	0	0.0198575	0.011968	0.001999	0.0218573	0.707727	0	0	0.001	0.015941	0.003	0.145429	0.00998301	0.004992	0.120976	0	0.006	0.028
Q. HUMAN HEALTH AND SOCIAL WORK ACTIVITIES				0.0393665	0.002998	0.00598701	0.002998	0.0129362	0.141378	0.0209141	0.0286318	0.002998	0.374033	0.0755485	0.0227772	0.251575	0.003	0.102418	0.0189051	0.0433728	0.0218692	0.003997	0.001999	0.009991	0.0129481	0.013947	0.0717707	0.0431238	0.372576	0.635052	0.002	0.991765	0.0635643	0.0178616	0.0976162	0.216111	0	0.002998	0.00698601	0.0886872	0.00896905	0.366343	0.0538248	0.0139133	0.130981	0.003995	0.0518051	0.0933497
Q	86	Human health activities		0.006989	0	0.001	0	0.001	0.0437605	0.003	0.0109551	0.001	0.0879234	0.00897602	0.004994	0.03871	0	0	0.001	0.006994	0.002	0.001	0.001	0.001	0.002	0.001	0.0189012	0.00797404	0.0931607	0.0983301	0	0.750965	0.004993	0	0.005992	0.00698202	0	0.001	0	0.011973	0.002998	0.0658711	0.0129511	0.001	0.0434856	0.001	0.001	0.008
Q	87	Residential care activities		0.007	0	0.002	0.002	0.002	0.0416184	0.002	0.003996	0	0.0878755	0.0198693	0.00698401	0.076648	0	0.006	0.005	0.01198	0.007	0	0	0	0.005	0.005	0.009975	0.00698401	0.0950908	0.30729	0	0.963936	0.00996306	0	0.00699	0.004994	0	0	0	0.032717	0.002	0.0636407	0.012954	0.003996	0.0237819	0	0.003	0.013
Q	88	Social work activities without accommodation		0.0257859	0.002998	0.002998	0.001	0.00996804	0.0630927	0.016	0.0139322	0.002	0.24757	0.0482652	0.010965	0.156808	0.003	0.097	0.012988	0.024954	0.013	0.003	0.001	0.009	0.006	0.008	0.0443555	0.0286484	0.235415	0.415706	0.002	0.0830983	0.0493943	0.0178616	0.0857861	0.206637	0	0.002	0.00698601	0.0464464	0.003997	0.275556	0.0288294	0.00896607	0.06934	0.002998	0.048	0.074
R. ARTS, ENTERTAINMENT AND RECREATION				0.414482	0.004993	0.533285	0.001999	0.723855	0.18832	0.0208722	0.0335815	0.001	0.465056	0.245755	0.022788	0.277023	0	0.001999	0.0159171	0.0879338	0.0579795	0.00698302	0	0.0129451	0.0179131	0.0198713	0.135662	0.0325163	0.235496	0.527641	0	0.0402726	0.304632	0.0218089	0.0374324	0.0286356	0	0.001999	0.418439	0.0718431	0.00698003	0.495583	0.0577027	0.0499609	0.288186	0.217003	0.015945	0.0685517
R	90	Creative, arts and entertainment activities		0.295407	0.003997	0.53	0.001	0.100422	0.0711175	0.004	0.003994	0.001	0.197923	0.0287328	0.008982	0.067966	0	0.001	0.004	0.024954	0.014	0.003997	0	0.005	0.001	0.006	0.0561103	0.0198387	0.108916	0.181191	0	0.0159122	0.0159043	0.00698003	0.014961	0.00897005	0	0.001	0.002	0.029791	0.001999	0.238585	0.0169022	0.00499101	0.159242	0.001	0	0.008
R	91	Libraries, archives, museums and other cultural activities		0.157261	0	0.005	0	0.692413	0.0494998	0.005	0.014	0	0.194876	0.0958221	0.005995	0.142848	0	0	0.005	0.03772	0.033	0.001	0	0.005	0.01	0.005	0.0542809	0.001999	0.0632922	0.117349	0	0.006989	0.005995	0.009	0.010965	0.009975	0	0	0	0.009975	0.001	0.141155	0.001999	0.009975	0.0480496	0.139812	0.005	0.032
R	92	Gambling and betting activities		0	0	0	0	0	0	0	0	0	0	0	0	0	0	0	0	0	0	0	0	0	0	0	0	0	0	0	0	0	0	0	0	0	0	0	0	0	0	0	0	0	0	0	0	0
R	93	Sports activities and amusement and recreation activities		0.0139282	0.001	0.002	0.001	0.002	0.0806695	0.012	0.0159291	0	0.171621	0.141145	0.007984	0.095028	0	0.001	0.007	0.027925	0.012	0.002	0	0.003	0.007	0.009	0.0317216	0.0109571	0.0840813	0.346417	0	0.0178903	0.289133	0.00598701	0.011979	0.00996803	0	0.001	0.417274	0.0337045	0.003995	0.228647	0.0395821	0.0355753	0.110633	0.088826	0.011	0.03
S. OTHER SERVICE ACTIVITIES				0.0159033	0.004996	0	0	0.00598701	0.117264	0.002998	0.852843	0	0.343653	0.0734304	0.0119511	0.238186	0	0	0.0208982	0.0589606	0.031745	0.002998	0	0.007988	0.004994	0.006988	0.0470823	0.0480401	0.29841	0.165401	0	0.0717793	0.907742	0.058785	0.0315976	0.0237682	0	0.002	0	0.0971224	0.00997202	0.275341	0.0178843	0.00698202	0.0923408	0	0.037835	0.034706
S	94	Activities of membership organisations		0.00798002	0.004	0	0	0.003996	0.0514664	0.001	0.00996406	0	0.176974	0.0631626	0.00699	0.200157	0	0	0.0189361	0.050422	0.017	0.002	0	0.006	0.002	0.004	0.0316722	0.0451785	0.248735	0.0519818	0	0.0413499	0.907372	0.0277016	0.0208584	0.0198525	0	0.002	0	0.0531567	0.007988	0.0456768	0.010972	0.00598801	0.0471521	0	0.033	0.021
S	95	Repair of computers and personal and household goods		0	0	0	0	0	0	0	0	0	0	0	0	0	0	0	0	0	0	0	0	0	0	0	0	0	0	0	0	0	0	0	0	0	0	0	0	0	0	0	0	0	0	0	0	0
S	96	Other personal service activities		0.00798701	0.001	0	0	0.001999	0.0693681	0.002	0.851362	0	0.202519	0.01096	0.004996	0.047545	0	0	0.002	0.008992	0.015	0.001	0	0.002	0.003	0.003	0.0159142	0.002997	0.0661218	0.119639	0	0.0317419	0.003996	0.031969	0.010968	0.003995	0	0	0	0.046434	0.002	0.240657	0.006989	0.001	0.0474249	0	0.005	0.014
T. ACTIVITIES OF HOUSEHOLDS AS EMPLOYERS; UNDIFFERENTIATED GOODS-AND SERVICES-PRODUCING ACTIVITIES OF HOUSEHOLDS FOR OWN USE				0	0	0	0	0	0	0	0	0	0	0	0	0	0	0	0	0	0	0	0	0	0	0	0	0	0	0	0	0	0	0	0	0	0	0	0	0	0	0	0	0	0	0	0	0
T	97	Activities of households as employers of domestic personnel		0	0	0	0	0	0	0	0	0	0	0	0	0	0	0	0	0	0	0	0	0	0	0	0	0	0	0	0	0	0	0	0	0	0	0	0	0	0	0	0	0	0	0	0	0
T	98	Undifferentiated goods- and services-producing activities of private households for own use		0	0	0	0	0	0	0	0	0	0	0	0	0	0	0	0	0	0	0	0	0	0	0	0	0	0	0	0	0	0	0	0	0	0	0	0	0	0	0	0	0	0	0	0	0
U. ACTIVITIES OF EXTRATERRITORIAL ORGANISATIONS AND BODIES				0	0	0	0	0	0	0	0	0	0	0	0	0	0	0	0	0	0	0	0	0	0	0	0	0	0	0	0	0	0	0	0	0	0	0	0	0	0	0	0	0	0	0	0	0
U	99	Activities of extraterritorial organisations and bodies		0	0	0	0	0	0	0	0	0	0	0	0	0	0	0	0	0	0	0	0	0	0	0	0	0	0	0	0	0	0	0	0	0	0	0	0	0	0	0	0	0	0	0	0	0

## Sheet: Figure 3 Data
Section	Description	Top Hotspot	Second Hotspot	Third Hotspot
A	Agri	Agriculture & Forestry	General Business & Industry	Business Travel
B	Mining	Metals & Mining	General Business & Industry	Construction & Maintenance
C	Manufacturing	General Business & Industry	Industrial Materials & Equipment	Construction & Maintenance
F	Construction	Construction & Maintenance	General Business & Industry	Shopping
G	Wholesale & Retail	Autos & Vehicles	Food & Drink	General Business & Industry
H	Transportation	Transportation & Logistics	Business Travel	General Business & Industry
I	Accomm & Food Services	Food & Drink	Business Travel	Shopping
M	Prof Activities	General Business & Industry	Science	Pets & Animals
N	Admin Services	General Business & Industry	Jobs & Education	Home & Garden
O	Public	General Business & Industry	Business Travel	Autos & Vehicles
P	Education	Jobs & Education	Shopping	Food & Drink
Q	Health	Health	Food & Drink	General Business & Industry
R	Arts	Visual Art & Design	Performing Arts	Food & Drink
S	Other	Hobbies & Leisure	Beauty & Fitness	General Business & Industry
